# Supplementary material for: Defense Compounds Rather Than Nutrient Availability Shape Aggressiveness Trait Variation Along a Leaf Maturity Gradient in a Biotrophic Plant Pathogen
Source: PubMed Central journal article supplement (PMC6172983; doi:10.3389/fpls.2018.01396), 2018-09-28

## *Supplementary Material*

### **Defense compounds rather than nutrient availability shape aggressiveness trait variation along a leaf maturity gradient in a biotrophic plant pathogen**

Agathe Maupetit, Romain Larbat, Michaël Pernaci, Axelle Andrieux, Cécile Guinet, Anne-Laure Boutigny, Bénédicte Fabre, Pascal Frey and Fabien Halkett

*Frontiers in Plant Science* (2018) 9:1396. doi: 10.3389/fpls.2018.01396

#### **Table of Content:**

|                                                                                                                                                                                                                                                                                                                                                                                                                                                                                                                                                                                                                      |                |
|----------------------------------------------------------------------------------------------------------------------------------------------------------------------------------------------------------------------------------------------------------------------------------------------------------------------------------------------------------------------------------------------------------------------------------------------------------------------------------------------------------------------------------------------------------------------------------------------------------------------|----------------|
| <b>Figure S1:</b>                                                                                                                                                                                                                                                                                                                                                                                                                                                                                                                                                                                                    | <b>Page 2</b>  |
| Experimental design for the 24 cell culture plates. Numbers correspond to the 3 eight LPIs and colours to the three plants.                                                                                                                                                                                                                                                                                                                                                                                                                                                                                          |                |
| <b>Figure S2:</b>                                                                                                                                                                                                                                                                                                                                                                                                                                                                                                                                                                                                    | <b>Page 4</b>  |
| Principal component analysis on leaf chemical content (carbon, nitrogen, glucose, 9 fructose, sucrose, salicin, total phenolics, Flavan-3-ols (Catechin, Proanthocyanidin dimers), 10 Hydroxycinnamic acid esters (chlorogenic acid, caffeoyl shikimate, caffeoyl glucose isomer1 11 and isomer2, coumaroyl glucose isomer1 and isomer2), Flavonols (rutin, quercitrin) and 12 Salicinoids (Salicine, salicortin, acetylsalicortin, homaloside D, tremulacin and a putative 13 populoside), LPI and plant are supplementary variables. Colors correspond to variables' 14 contribution to the first and second axes. |                |
| <b>Figure S3:</b>                                                                                                                                                                                                                                                                                                                                                                                                                                                                                                                                                                                                    | <b>Page 5</b>  |
| Barplots of trait means and standard error, (i) across LPI: (A) infection efficiency, 18 (D) latent period, (G) mycelium quantity, and (J) spore volume; (ii) for each inoculation day 19 and each plant: (B and C) infection efficiency, (E and F) latent period, (H and I) mycelium 20 quantity, (K and L) spore volume, (M and N) uredinia size, (O and P) sporulation capacity, 21 and (Q) sporulation rate (for each day only).                                                                                                                                                                                 |                |
| <b>Note S1:</b>                                                                                                                                                                                                                                                                                                                                                                                                                                                                                                                                                                                                      | <b>Page 8</b>  |
| ImageJ script for uredinia size analysis                                                                                                                                                                                                                                                                                                                                                                                                                                                                                                                                                                             |                |
| <b>Note S2:</b>                                                                                                                                                                                                                                                                                                                                                                                                                                                                                                                                                                                                      | <b>Page 10</b> |
| Script and outputs of statistical analyses using R (RMarkdown document)                                                                                                                                                                                                                                                                                                                                                                                                                                                                                                                                              |                |

**Figure S1:** Experimental design for the 24 cell culture plates. Numbers correspond to the eight LPIs and colours to the three plants.

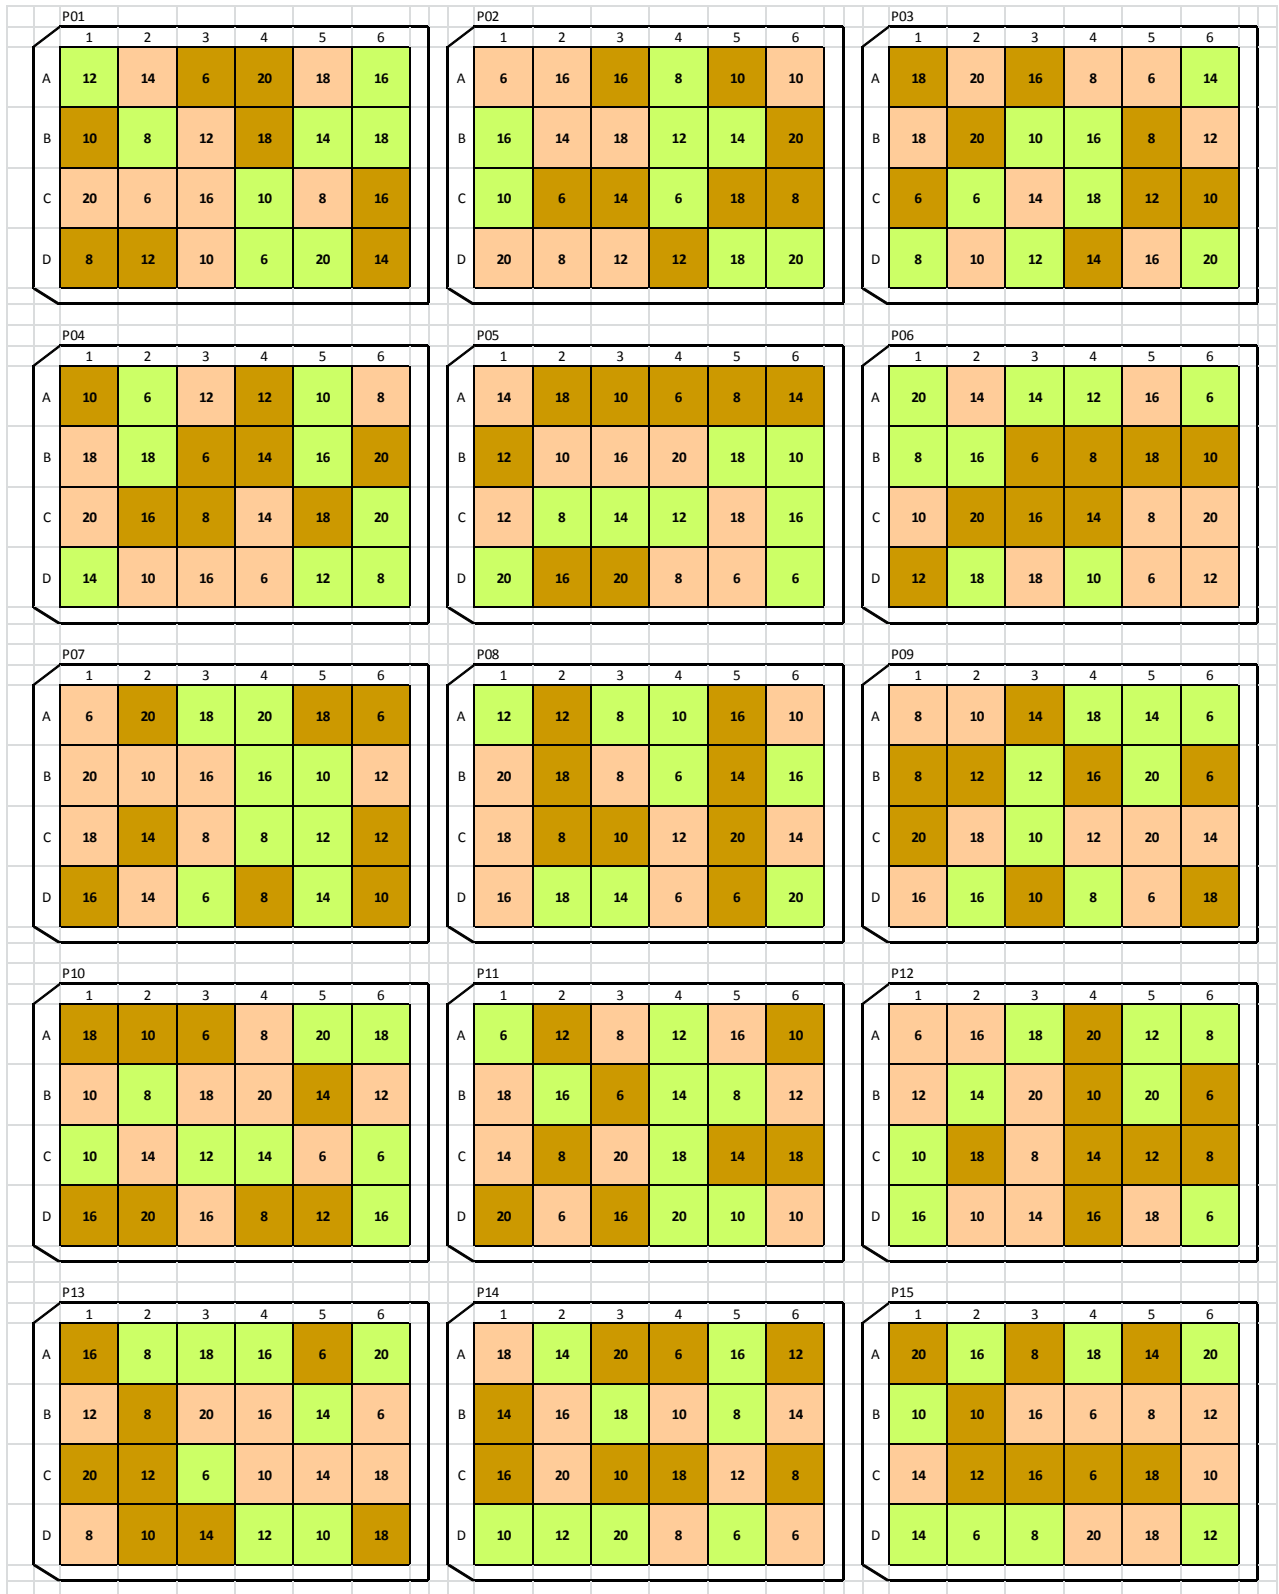

| P19 |    |    |    |    |    |    | P20 |    |    |    |    |    |    | P21 |    |    |    |    |    |    |
|-----|----|----|----|----|----|----|-----|----|----|----|----|----|----|-----|----|----|----|----|----|----|
|     | 1  | 2  | 3  | 4  | 5  | 6  |     | 1  | 2  | 3  | 4  | 5  | 6  |     | 1  | 2  | 3  | 4  | 5  | 6  |
| A   | 20 | 14 | 10 | 20 | 20 | 14 | A   | 16 | 8  | 20 | 16 | 6  | 6  | A   | 6  | 18 | 18 | 14 | 12 | 20 |
| B   | 12 | 18 | 16 | 12 | 10 | 6  | B   | 10 | 20 | 8  | 14 | 6  | 16 | B   | 6  | 12 | 6  | 20 | 14 | 10 |
| C   | 6  | 6  | 12 | 8  | 8  | 18 | C   | 14 | 10 | 12 | 14 | 18 | 8  | C   | 8  | 14 | 16 | 16 | 12 | 16 |
| D   | 16 | 14 | 8  | 10 | 16 | 18 | D   | 18 | 12 | 20 | 12 | 10 | 18 | D   | 10 | 10 | 20 | 8  | 8  | 18 |

  

| P22 |    |    |    |    |    |    | P23 |    |    |    |    |    |    | P24 |    |    |    |    |    |    |
|-----|----|----|----|----|----|----|-----|----|----|----|----|----|----|-----|----|----|----|----|----|----|
|     | 1  | 2  | 3  | 4  | 5  | 6  |     | 1  | 2  | 3  | 4  | 5  | 6  |     | 1  | 2  | 3  | 4  | 5  | 6  |
| A   | 16 | 14 | 10 | 18 | 6  | 12 | A   | 12 | 12 | 6  | 16 | 10 | 8  | A   | 8  | 6  | 12 | 20 | 18 | 12 |
| B   | 20 | 10 | 18 | 6  | 16 | 20 | B   | 10 | 20 | 6  | 20 | 8  | 14 | B   | 16 | 18 | 10 | 16 | 20 | 16 |
| C   | 12 | 18 | 10 | 16 | 8  | 6  | C   | 12 | 16 | 6  | 14 | 18 | 14 | C   | 8  | 12 | 20 | 14 | 10 | 10 |
| D   | 14 | 8  | 8  | 14 | 20 | 12 | D   | 10 | 16 | 18 | 20 | 8  | 18 | D   | 18 | 14 | 6  | 14 | 8  | 6  |

**Figure S2:** Principal component analysis on leaf chemical content (carbon, nitrogen, glucose, fructose, sucrose, salicin, total phenolics, Flavan-3-ols (Catechin, Proanthocyanidin dimers), Hydroxycinnamic acid esters (chlorogenic acid, caffeoyl shikimate, caffeoyl glucose isomer1 and isomer2, coumaroyl glucose isomer1 and isomer2), Flavonols (rutin, quercitrin) and Salicinoids (Salicine, salicortin, acetylsalicortin, homaloside D, tremulacin and a putative populoside), LPI and plant are supplementary variables. Colors correspond to variables' contribution to the first and second axes.

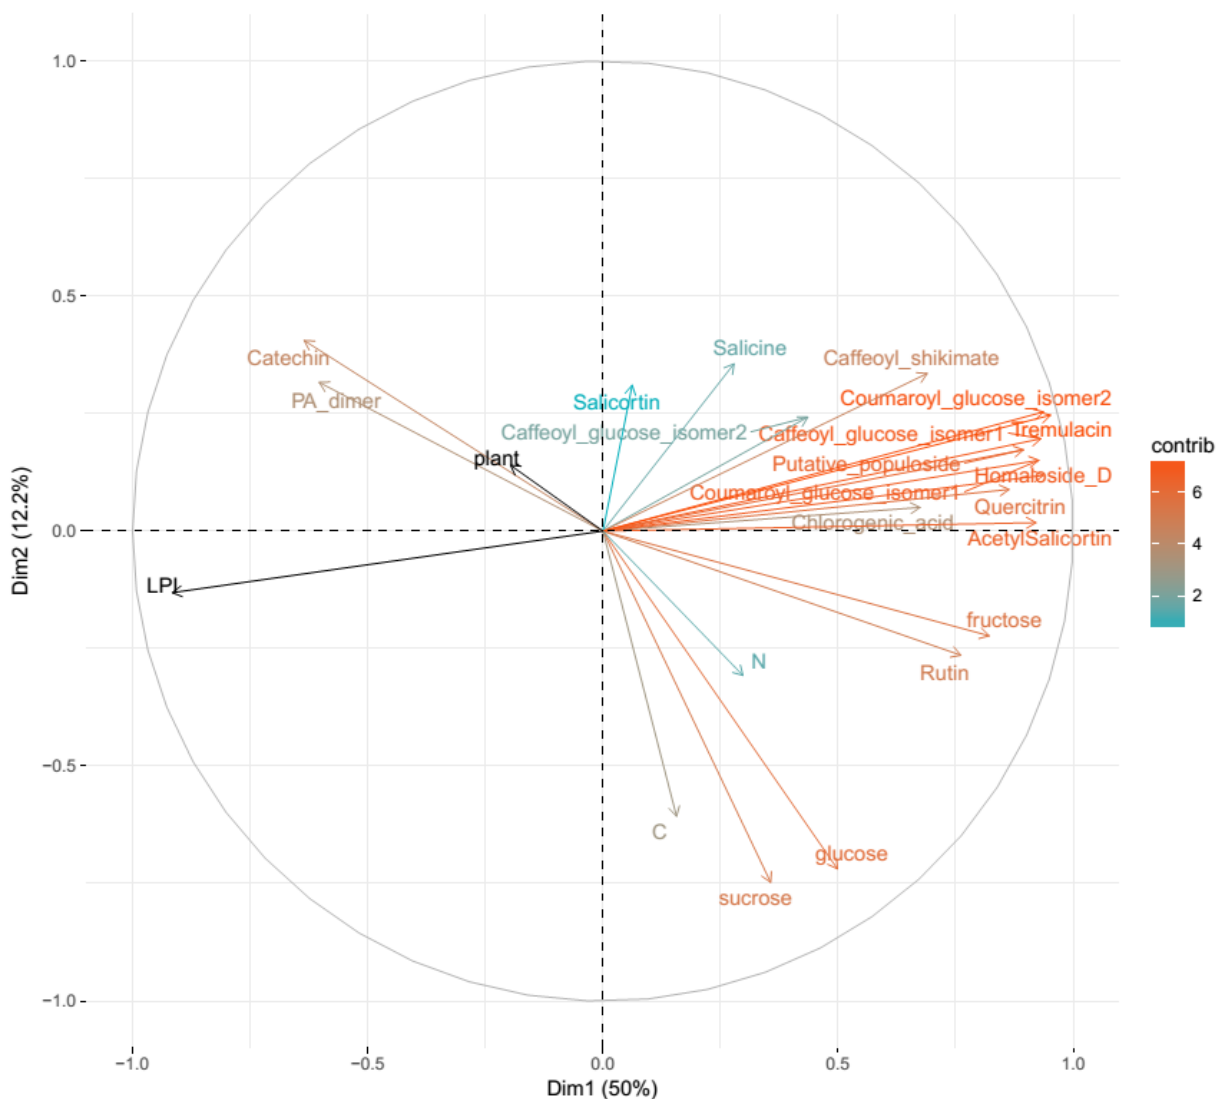

**Figure S3:** Barplots of trait means and standard error, (i) across LPI: **(A)** infection efficiency, **(D)** latent period, **(G)** mycelium quantity, and **(J)** spore volume; (ii) for each inoculation day and each plant: **(B and C)** infection efficiency, **(E and F)** latent period, **(H and I)** mycelium quantity, **(K and L)** spore volume, **(M and N)** uredinia size, **(O and P)** sporulation capacity, and **(Q)** sporulation rate (for each day only).

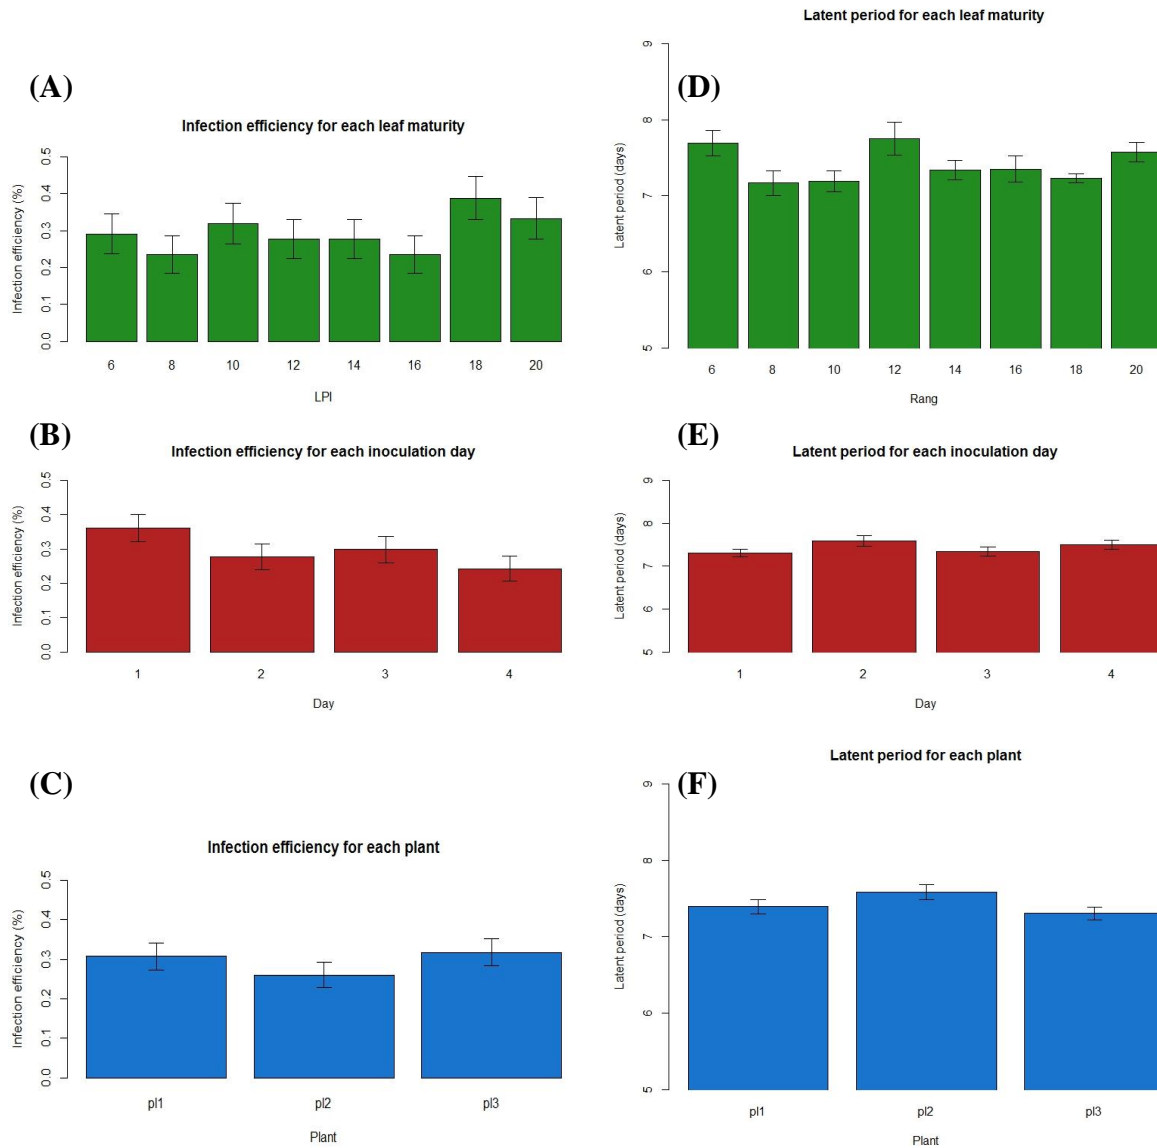

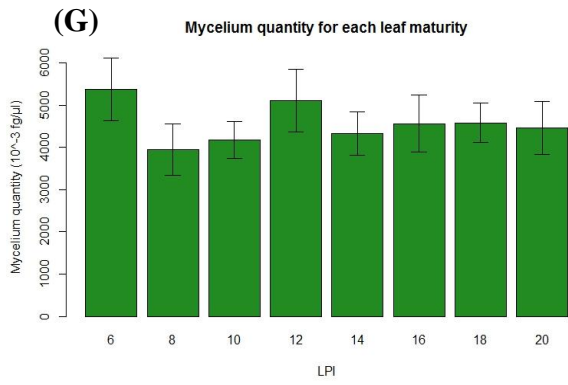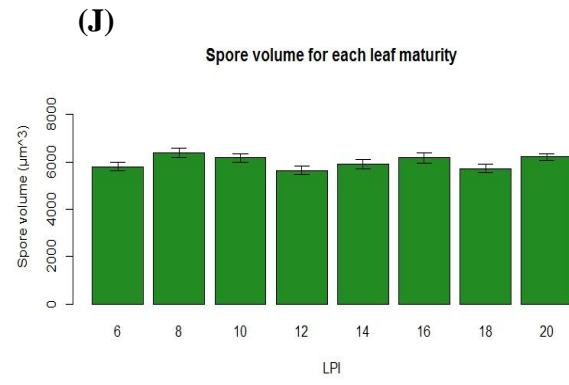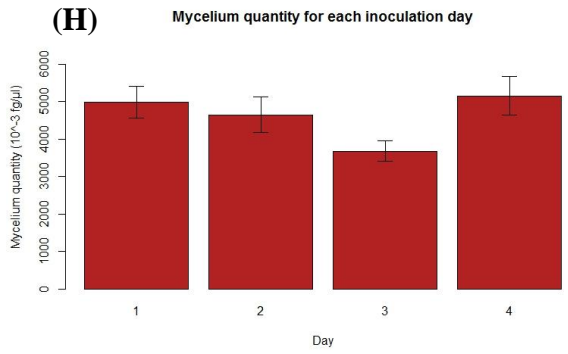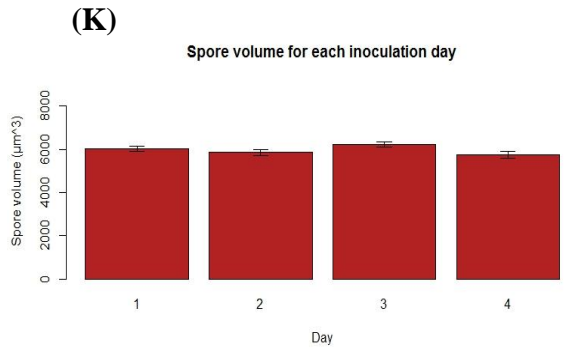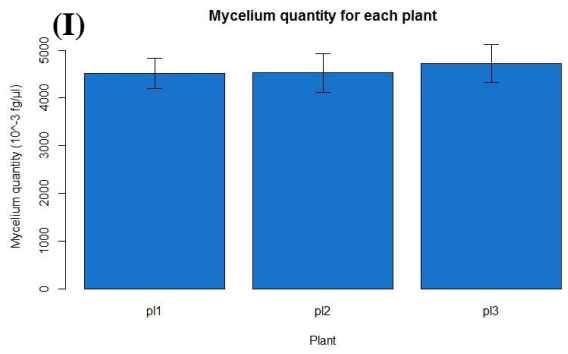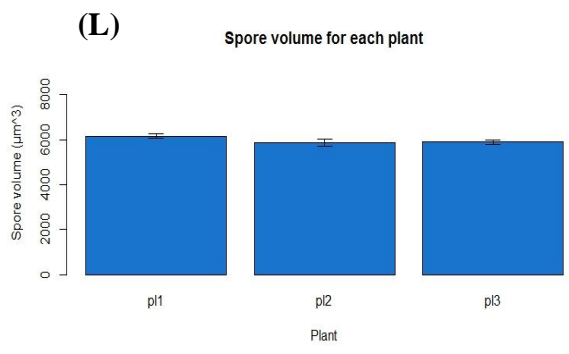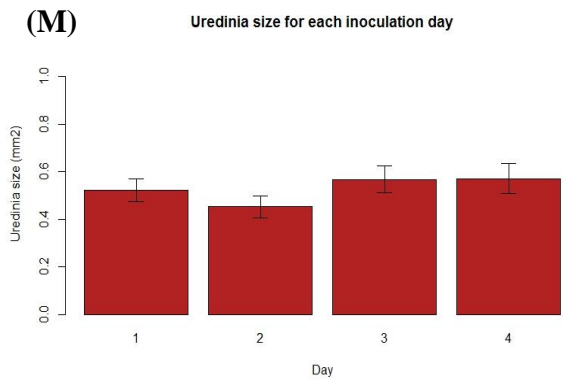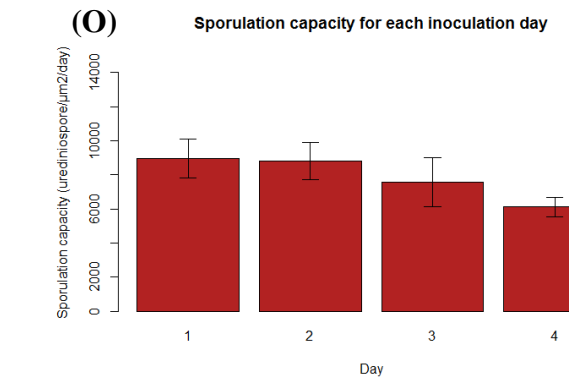

(N)

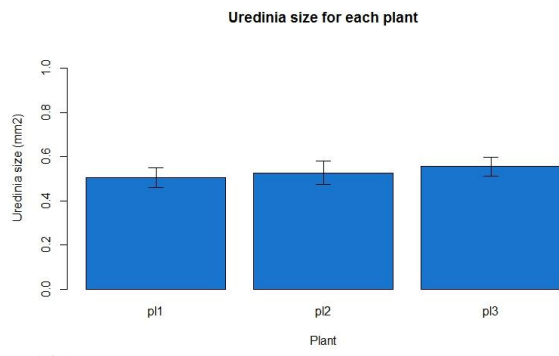

(P)

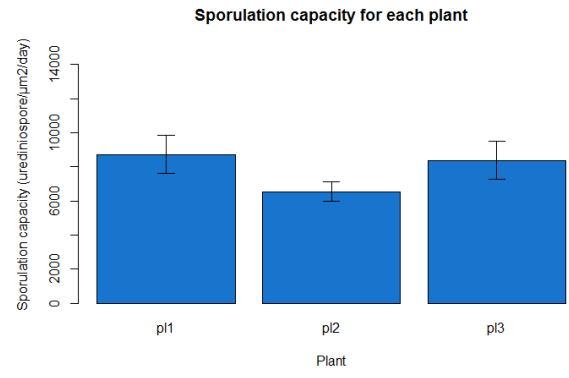

(Q)

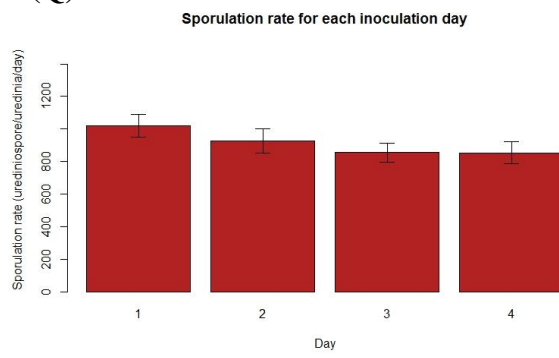

**Note S1:** ImageJ script for uredinia size analysis

```
// Area calculation for all pictures in the directory
input = "Z:\\Rangf\\Rgf_photoU\\";
list = getFileList(input);

for (p = 0; p < list.length; p++) {
open(list[p]) ;
// Color Thresholder 1.49v
// Autogenerated macro, single images only!
    min=newArray(3);
    max=newArray(3);
    filter=newArray(3);
    a=getTitle();
    run("HSB Stack");
    run("Convert Stack to Images");
    selectWindow("Hue");
    rename("0");
    selectWindow("Saturation");
    rename("1");
    selectWindow("Brightness");
    rename("2");
    min[0]=0;
    max[0]=37;
    filter[0]="pass";
    min[1]=0;
    max[1]=255;
    filter[1]="pass";
    min[2]=0;
    max[2]=255;
    filter[2]="pass";
    for (i=0;i<3;i++){
        selectWindow(""+i);
        setThreshold(min[i], max[i]);
        run("Convert to Mask");
        if (filter[i]=="stop") run("Invert");
    }
    imageCalculator("AND create", "0","1");
    imageCalculator("AND create", "Result of 0","2");
    for (i=0;i<3;i++){
        selectWindow(""+i);
        close();
    }
    selectWindow("Result of 0");
    close();
}
```



```
selectWindow("Result of Result of 0");
rename(a);
// Colour Thresholding-----
run("8-bit");
run("Close-");
run("Fill Holes");
run("Set Scale...", "distance=392 known=1000 pixel=1 unit=microm");
run("Analyze Particles...", "size=19000.00-Infinity display exclude");
run("Close All");
}
```

**Note S2:** Script and outputs of statistical analyses using R (RMarkdown document)

## Analysis: Leaf maturity

```
knitr::opts_chunk$set(echo = T, include = T, message = T, error = T, warning = F)
setwd("C:/OneDrive Entreprise 1/Rangf")
rm(list=ls())

library(sciplot) # bargraph
library(car) # Anova
library(agricolae) # HSD.test
library(Hmisc) # test of correlations
library(lme4) # (g)lmer
library(ggplot2) # plots
library(factoextra) # plot PCA
library(ade4) # PCA
library(plotrix) # locator in plot
library(corrplot) # correlation matrix representation
library(knitr) # table
```

## Dataset

```
results <- read.table('M:/Rangf/Rgf_results.txt', header = T, dec = ".")
results <- results[,c(2:7,9:12)]
names(results) <- c("LPI", "plant", "day", "infection_efficiency", "latent_period", "uredinia_size", "spore_volume", "sporulation_rate", "sporulation_capacity", "mycelium_quantity")

# Add LPI-plant id
results$leaf_id <- paste("lpi", results$LPI, results$plant, sep = "")

# Add sugars and phenolics contents
sugar <- read.table('M:/Rangf/Rgf_sugar.txt', header = T)
sugar$leaf_id <- paste("lpi", sugar$LPI, "pl", sugar$plant, sep = "")
phenolics <- read.table('M:/Rangf/phenolicsRomain.txt', header = T)
phenolics$leaf_id <- paste("lpi", phenolics$LPI, "pl", phenolics$plant, sep = "")

results$sugars <- NA
results$sucrose <- NA
results$salicin <- NA
results$glucose <- NA
results$fructose <- NA
results$Chlorogenic_acid <- NA
results$PA_dimer <- NA
```

```

results$Salicine <- NA
results$Caffeoyl_glucose_isomer1 <- NA
results$Catechin <- NA
results$Coumaroyl_glucose_isomer1 <- NA
results$Caffeoyl_glucose_isomer2 <- NA
results$Coumaroyl_glucose_isomer2 <- NA
results$Caffeoyl_shikimate <- NA
results$Salicortin <- NA
results$Rutin <- NA
results$AcetylSalicortin <- NA
results$Quercitrin <- NA
results$Homaloside_D <- NA
results$Putative_populoside <- NA
results$Tremulacin <- NA
results$flavan3ol <- NA
results$hydroxycinnamic_acid_esters <- NA
results$flavonol <- NA
results$salicinoid <- NA

i=1 # Line of results
for (li in 1:nrow(results)){
  t=1 # Line of sugar
  for (t in 1:nrow(sugar)){
    if (results[i,"leaf_id"] == sugar[t,"leaf_id"]){
      results[i,"sugars"] = sugar[t,"total.sugar"];
      results[i,"sucrose"] = sugar[t,"sucrose"];
      results[i,"salicin"] = sugar[t,"salicin"];
      results[i,"glucose"] = sugar[t,"glucose"];
      results[i,"fructose"] = sugar[t,"fructose"];
      results[i,"Chlorogenic_acid"] = phenolics[t,"Chlorogenic_acid"];
      results[i,"PA_dimer"] = phenolics[t,"PA_dimer"];
      results[i,"Salicine"] = phenolics[t,"Salicine"];
      results[i,"Caffeoyl_glucose_isomer1"] = phenolics[t,"Caffeoyl_glucose
_isomer1"];
      results[i,"Catechin"] = phenolics[t,"Catechin"];
      results[i,"Coumaroyl_glucose_isomer1"] = phenolics[t,"Coumaroyl_gluco
se_isomer1"];
      results[i,"Caffeoyl_glucose_isomer2"] = phenolics[t,"Caffeoyl_glucose
_isomer2"];
      results[i,"Coumaroyl_glucose_isomer2"] = phenolics[t,"Coumaroyl_gluco
se_isomer2"];
      results[i,"Caffeoyl_shikimate"] = phenolics[t,"Caffeoyl_shikimate"];
      results[i,"Salicortin"] = phenolics[t,"Salicortin"];
      results[i,"Rutin"] = phenolics[t,"Rutin"];
      results[i,"AcetylSalicortin"] = phenolics[t,"AcetylSalicortin"];
      results[i,"Quercitrin"] = phenolics[t,"Quercitrin"];
      results[i,"Homaloside_D"] = phenolics[t,"Homaloside_D"];
    }
  }
}

```

```

    results[i,"Putative_populoside"] = phenolics[t,"Putative_populoside"]
;
    results[i,"Tremulacin"] = phenolics[t,"Tremulacin"];
    results[i,"flavan3ol"] = phenolics[t,"flavan3ol"];
    results[i,"hydroxycinnamic_acid_esters"] = phenolics[t,"hydroxycinnam
ic_acid_esters"];
    results[i,"flavonol"] = phenolics[t,"flavonol"];
    results[i,"salicinoid"] = phenolics[t,"salicinoid"];}
    else{t=t+1}
}
i=i+1
}

# Add C and N content
CN <- read.table('C:/OneDrive Entreprise 1/Rangf/Rgf_CN.txt', header=T)
CN$leaf_id <- paste("lpi", CN$LPI, "pl",CN$plant, sep="")
results$C <- NA
results$N <- NA
i=1 # Line of results
for (li in 1:nrow(results)){
  t=1 # Line of CN
  for (t in 1:nrow(CN)){
    if (results[i,"leaf_id"] == CN[t,"leaf_id"])
    {results[i,"C"] = CN[t,"C"];
    results[i,"N"] = CN[t,"N"]}
    else{t=t+1}
  }
  i=i+1
}

# Add total_phenolics content
phenol <- read.table('Rgf_phenol.txt', header=T)
phenol$leaf_id <- paste("lpi", phenol$LPI, "pl", phenol$plant, sep="")
results$total_phenolics <- NA
i=1 # Line of results
for (li in 1:nrow(results)){
  t=1 # Line of phenol
  for (t in 1:nrow(phenol)){
    if (results[i,"leaf_id"] == phenol[t,"leaf_id"]){results[i,"total_pheno
lics"] = phenol[t,"polyphenols"]}
    else{t=t+1}
  }
  i=i+1
}

# Create dataset without NA
resna <- na.omit(results)

```

```
print(results[1:5,])
```

```
##  LPI plant day infection_efficiency latent_period uredinia_size
## 1  12  pl2  1                0                NA                NA
## 2  14  pl3  1                0                NA                NA
## 3   6  pl1  1                0                NA                NA
## 4  20  pl1  1                0                NA                NA
## 5  18  pl3  1                0                NA                NA
##  spore_volume sporulation_rate sporulation_capacity mycelium_quantity
## 1                NA                NA                NA                NA
## 2                NA                NA                NA                NA
## 3                NA                NA                NA                NA
## 4                NA                NA                NA                NA
## 5                NA                NA                NA                NA
##  leaf_id sugars sucrose salicin glucose fructose Chlorogenic_acid
## 1 lpi12pl2 11.5433 5.9248 3.3874 1.7929 0.4382 293.3551
## 2 lpi14pl3 12.4972 6.6359 2.9483 2.5042 0.4088 235.6265
## 3 lpi6pl1 19.5985 8.4850 7.0431 3.2729 0.7975 329.5043
## 4 lpi20pl1 9.9788 5.5914 2.2550 1.7540 0.3784 144.9384
## 5 lpi18pl3 13.3956 7.1842 2.4821 3.2714 0.4579 208.6286
##  PA_dimer Salicine Caffeoyle_gluco_e_isomer1 Catechin
## 1 102.09041 225.5841                225.11115 194.6124
## 2  83.63304 212.9060                243.87910 232.0630
## 3 105.26757 402.4872                828.99821 258.8848
## 4 169.07114 192.3394                64.12952 491.6920
## 5  60.43040 217.1388                114.77916 230.8109
##  Coumaroyl_gluco_e_isomer1 Caffeoyle_gluco_e_isomer2
## 1                374.29476                390.6262
## 2                434.34332                383.9139
## 3                1606.89498                605.2932
## 4                64.94667                168.3602
## 5                207.05440                359.4917
##  Coumaroyl_gluco_e_isomer2 Caffeoyle_shikimate Salicortin  Rutin
## 1                170.5567                527.2811 2183.894 3863.224
## 2                177.3747                519.3555 2286.413 5446.480
## 3                485.8900                596.7956 2515.940 3922.821
## 4                175.0707                560.6161 7817.305 2379.541
## 5                103.3844                406.3848 1749.402 3909.784
##  AcetylSalicortin Quercitrin Homaloside_D Putative_populoside Tremulaci
n
## 1                1954.644 6432.348 3051.530                2175.010 487.539
6
## 2                2525.289 7793.757 3043.833                2594.959 555.302
2
## 3                3326.623 9308.485 4290.555                5048.813 1429.551
3
```

```

## 4      1294.262  4549.841  2361.481      1457.454  284.545
8
## 5      1592.809  4713.801  2596.871      1408.428  304.051
5
## flavan3ol hydroxycinnamic_acid_esters flavonol salicinoid      C
## 1 296.7028      1981.225 10295.572 10078.202 43.87680
## 2 315.6960      1994.493 13240.237 11218.703 43.60076
## 3 364.1524      4453.376 13231.306 17013.969 43.71679
## 4 660.7631      1178.062 6929.382 13407.387 43.72755
## 5 291.2413      1399.723 8623.585 7868.701 43.40789
##      N total_phenolics
## 1 1.746716      41.1
## 2 2.334496      37.7
## 3 2.139641      54.5
## 4 1.862166      39.3
## 5 2.237561      32.3

```

**summary(results)**

```

##      LPI      plant      day      infection_efficiency
## Min.   : 6.0    pl1:192  Min.   :1.00  Min.   :0.0000
## 1st Qu.: 9.5    pl2:192  1st Qu.:1.75  1st Qu.:0.0000
## Median :13.0   pl3:192  Median :2.50  Median :0.0000
## Mean   :13.0           Mean   :2.50  Mean   :0.2951
## 3rd Qu.:16.5           3rd Qu.:3.25  3rd Qu.:1.0000
## Max.   :20.0           Max.   :4.00  Max.   :1.0000
##
## latent_period  uredinia_size  spore_volume  sporulation_rate
## Min.   : 6.000  Min.   :0.0266  Min.   :3326  Min.   : 98.0
## 1st Qu.: 7.000  1st Qu.:0.2431  1st Qu.:5522  1st Qu.: 309.8
## Median : 7.250  Median :0.4429  Median :6019  Median : 413.4
## Mean   : 7.413  Mean   :0.5213  Mean   :5988  Mean   : 458.3
## 3rd Qu.: 7.500  3rd Qu.:0.7383  3rd Qu.:6497  3rd Qu.: 608.5
## Max.   :10.000  Max.   :1.6141  Max.   :9109  Max.   :1241.1
## NA's   :410    NA's   :410    NA's   :417    NA's   :417
## sporulation_capacity mycelium_quantity  leaf_id
## Min.   : 2092      Min.   : 613.1  Length:576
## 1st Qu.: 4322      1st Qu.: 2692.8  Class :character
## Median : 6255      Median : 4309.4  Mode  :character
## Mean   : 7945      Mean   : 4607.5
## 3rd Qu.: 9110      3rd Qu.: 5692.0
## Max.   :64429      Max.   :14388.9
## NA's   :417      NA's   :411
##      sugars      sucrose      salicin      glucose
## Min.   : 3.232  Min.   :1.586  Min.   :0.8027  Min.   :0.4798
## 1st Qu.: 8.580  1st Qu.:3.889  1st Qu.:2.1578  1st Qu.:1.6700
## Median :11.912  Median :5.914  Median :2.6902  Median :2.2866
## Mean   :11.135  Mean   :5.511  Mean   :2.9631  Mean   :2.1963

```

```

## 3rd Qu.:14.130 3rd Qu.:7.188 3rd Qu.:3.8746 3rd Qu.:2.9285
## Max. :19.599 Max. :8.485 Max. :7.0431 Max. :3.4722
##
## fructose Chlorogenic_acid PA_dimer Salicine
## Min. :0.3273 Min. :144.9 Min. : 36.02 Min. :182.2
## 1st Qu.:0.3782 1st Qu.:235.0 1st Qu.: 79.25 1st Qu.:193.1
## Median :0.4401 Median :280.4 Median :104.60 Median :217.0
## Mean :0.4644 Mean :279.1 Mean :106.59 Mean :240.9
## 3rd Qu.:0.5192 3rd Qu.:322.6 3rd Qu.:130.10 3rd Qu.:246.2
## Max. :0.7975 Max. :427.5 Max. :212.45 Max. :491.6
##
## Caffeoyl_glucose_isomer1 Catechin Coumaroyl_glucose_isomer1
## Min. : 64.13 Min. :171.3 Min. : 64.95
## 1st Qu.:141.72 1st Qu.:223.3 1st Qu.: 223.32
## Median : 234.28 Median :252.5 Median : 385.07
## Mean : 314.29 Mean :271.4 Mean : 598.48
## 3rd Qu.: 370.11 3rd Qu.:311.2 3rd Qu.: 824.29
## Max. :1131.92 Max. :491.7 Max. :2430.21
##
## Caffeoyl_glucose_isomer2 Coumaroyl_glucose_isomer2 Caffeoyl_shikimate
## Min. :168.4 Min. :101.7 Min. :406.4
## 1st Qu.:388.9 1st Qu.:116.9 1st Qu.:474.1
## Median :442.3 Median :175.1 Median :510.3
## Mean :432.7 Mean :213.7 Mean :516.2
## 3rd Qu.:469.2 3rd Qu.:275.5 3rd Qu.:549.9
## Max. :605.3 Max. :485.9 Max. :658.6
##
## Salicortin Rutin AcetylSalicortin Quercitrin
## Min. :1576 Min. :2380 Min. :1250 Min. : 4550
## 1st Qu.:1812 1st Qu.:2984 1st Qu.:1575 1st Qu.: 5032
## Median :2253 Median :3883 Median :1996 Median : 6652
## Mean :2487 Mean :4177 Mean :2289 Mean : 6830
## 3rd Qu.:2527 3rd Qu.:4510 3rd Qu.:3096 3rd Qu.: 8358
## Max. :7817 Max. :8637 Max. :4391 Max. :11105
##
## Homaloside_D Putative_populoside Tremulacin flavan3ol
## Min. :2361 Min. :1408 Min. : 183.7 Min. :209.3
## 1st Qu.:2643 1st Qu.:1666 1st Qu.: 331.9 1st Qu.:291.9
## Median :3048 Median :2217 Median : 506.3 Median :361.8
## Mean :3159 Mean :2674 Mean : 612.9 Mean :378.0
## 3rd Qu.:3502 3rd Qu.:3319 3rd Qu.: 736.5 3rd Qu.:434.0
## Max. :4348 Max. :5049 Max. :1450.8 Max. :660.8
##
## hydroxycinnamic_acid_esters flavonol salicinoid
## Min. :1178 Min. : 6929 Min. : 7425
## 1st Qu.:1653 1st Qu.: 8502 1st Qu.: 8298
## Median :1998 Median :10860 Median :10824

```

```
## Mean :2354 Mean :11007 Mean :11462
## 3rd Qu.:2718 3rd Qu.:13234 3rd Qu.:13403
## Max. :5529 Max. :17380 Max. :18781
##
## C N total_phenolics
## Min. :43.07 Min. :1.721 Min. :28.70
## 1st Qu.:43.41 1st Qu.:1.846 1st Qu.:33.73
## Median :43.64 Median :2.004 Median :38.15
## Mean :43.62 Mean :2.071 Mean :37.61
## 3rd Qu.:43.79 3rd Qu.:2.262 3rd Qu.:41.15
## Max. :44.04 Max. :2.697 Max. :54.50
##
```

Check for biological replicates

```
# replicates per LPI
dim(resna[which(resna$LPI == 6),])[1]
## [1] 21

dim(resna[which(resna$LPI == 8),])[1]
## [1] 15

dim(resna[which(resna$LPI == 10),])[1]
## [1] 20

dim(resna[which(resna$LPI == 12),])[1]
## [1] 19

dim(resna[which(resna$LPI == 14),])[1]
## [1] 19

dim(resna[which(resna$LPI == 16),])[1]
## [1] 17

dim(resna[which(resna$LPI == 18),])[1]
## [1] 24

dim(resna[which(resna$LPI == 20),])[1]
## [1] 23

# replicates per LPI in plant1
plant1 <- resna[which(resna$plant == 'p11'),]
dim(plant1[which(plant1$LPI == 6),])[1]
## [1] 4
```



```

dim(plant1[which(plant1$LPI == 8),])[1]
## [1] 7
dim(plant1[which(plant1$LPI == 10),])[1]
## [1] 9
dim(plant1[which(plant1$LPI == 12),])[1]
## [1] 6
dim(plant1[which(plant1$LPI == 14),])[1]
## [1] 8
dim(plant1[which(plant1$LPI == 16),])[1]
## [1] 5
dim(plant1[which(plant1$LPI == 18),])[1]
## [1] 8
dim(plant1[which(plant1$LPI == 20),])[1]
## [1] 9

# replicates per LPI in plant2
plant2 <- resna[which(resna$plant == 'p12'),]
dim(plant2[which(plant2$LPI == 6),])[1]
## [1] 5
dim(plant2[which(plant2$LPI == 8),])[1]
## [1] 4
dim(plant2[which(plant2$LPI == 10),])[1]
## [1] 4
dim(plant2[which(plant2$LPI == 12),])[1]
## [1] 6
dim(plant2[which(plant2$LPI == 14),])[1]
## [1] 4
dim(plant2[which(plant2$LPI == 16),])[1]
## [1] 7
dim(plant2[which(plant2$LPI == 18),])[1]

```

```

## [1] 10

dim(plant2[which(plant2$LPI == 20),])[1]

## [1] 7

# replicates per LPI in plant3
plant3 <- resna[which(resna$plant == 'p13'),]
dim(plant3[which(plant3$LPI == 6),])[1]

## [1] 12

dim(plant3[which(plant3$LPI == 8),])[1]

## [1] 4

dim(plant3[which(plant3$LPI == 10),])[1]

## [1] 7

dim(plant3[which(plant3$LPI == 12),])[1]

## [1] 7

dim(plant3[which(plant3$LPI == 14),])[1]

## [1] 7

dim(plant3[which(plant3$LPI == 16),])[1]

## [1] 5

dim(plant3[which(plant3$LPI == 18),])[1]

## [1] 6

dim(plant3[which(plant3$LPI == 20),])[1]

## [1] 7

rm(plant1, plant2, plant3)

```

## Phenotypic data exploration: PCA

Describe the raw fungal data:

```

# PCA on fungal data
pca <- dudi.pca(resna[,c('latent_period', 'uredinia_size', 'spore_volume',
' sporulation_rate', 'sporulation_capacity', 'mycelium_quantity')], center=T
, scale=T, nf=3, scannf=FALSE)
resna$plantN <- as.numeric(resna$plant)
sup <- supcol(pca, scalewt(resna[c('LPI', 'plantN', 'day')]))$cosup
p <- fviz_pca_var(pca,

```

```

col.var = "contrib", # Color by contributions to the PC
gradient.cols = c("#00AFBB", "#FC4E07"),
repel = TRUE) # Avoid text overlapping
# Add experimental (LPI, plant and day) data as supplementary variables
fviz_add(p, sup, geom="arrow", linetype='solid', color = "black")

```

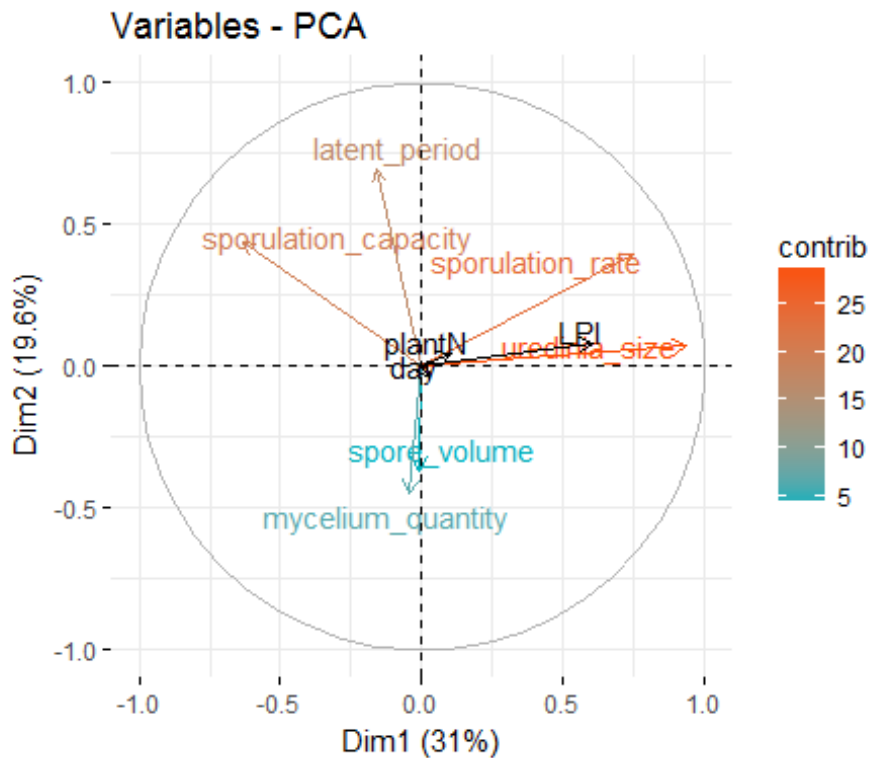

```

# color scale for LPI representation on 1st and 2nd axis
cc <- scales::seq_gradient_pal("blue", "red", "Lab")(seq(0,1,length.out=8))
s.class(dfxy = pca$li, fac = as.factor(resna$LPI), col = cc, clabel = 0.9, g
rid= 0, xax = 1, yax = 2, add.plot= F, cellipse = F)

```

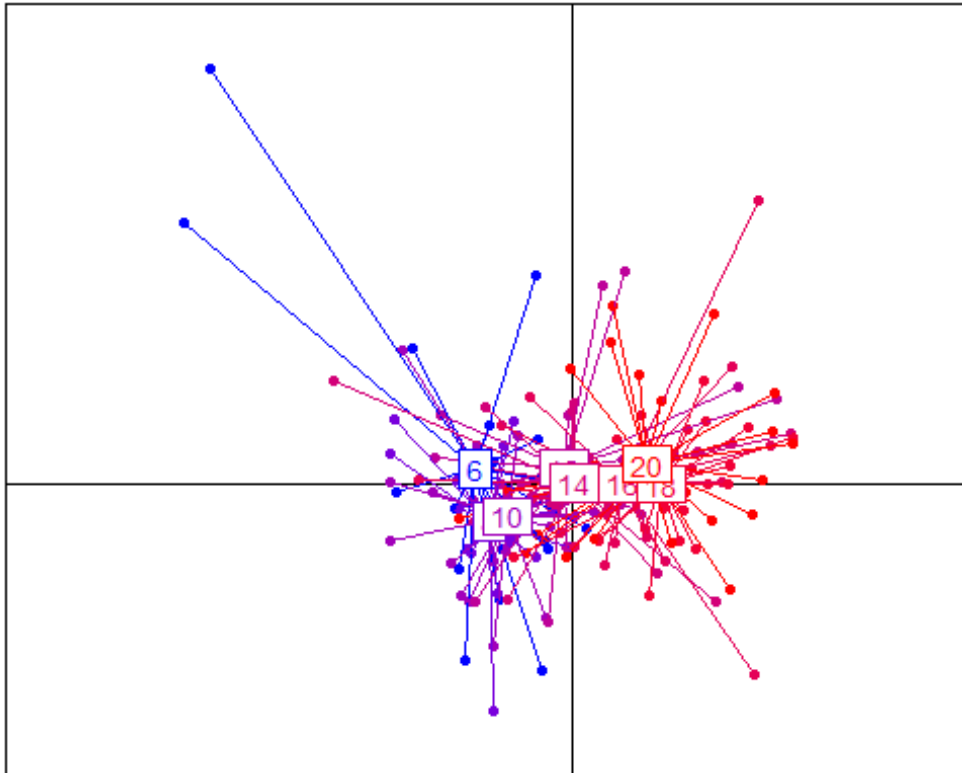

Uredinia size and sporulation rate shape the 1st axis. The experimental variable LPI well explained this 1st axis even if some residual variance is not explained. Noteworthy the two other experimental variables (plant and day) do not contributed to the 1st or 2nd axis. This is consistent with GLM results: LPI has a significant effect on uredinia size and sporulation rate.

```
# PCA representation of 1st and 3rd axis
fviz_pca_var(pca, axes = c(2, 3),
  col.var = "contrib", # Color by contributions to the PC
  gradient.cols = c("#00AFBB", "#FC4E07"),
  repel = TRUE)      # Avoid text overlapping
```

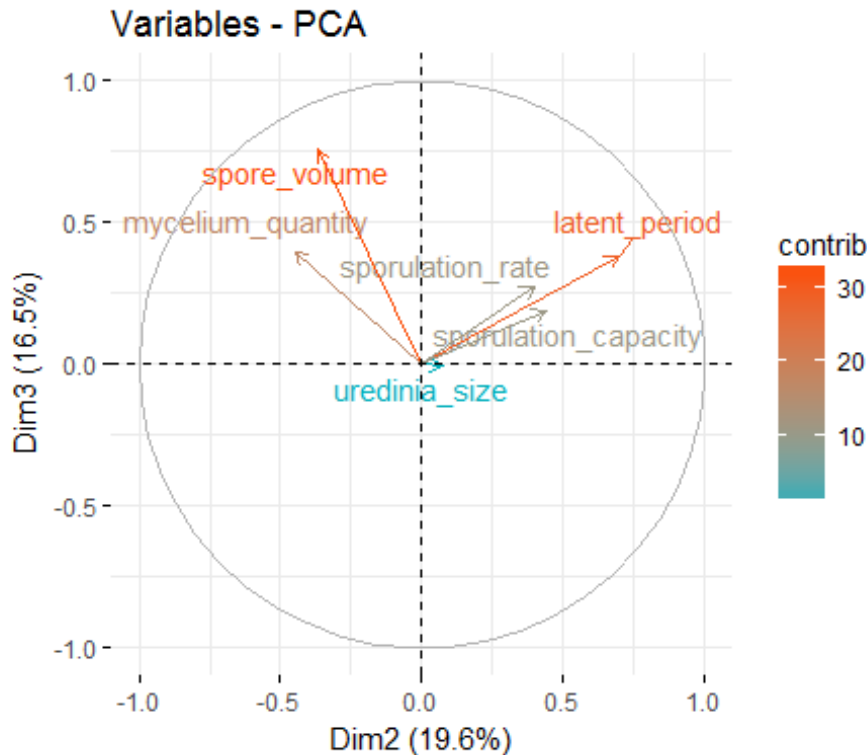

# PCA variances explained on the 3 first axis

```
pca.var <- data.frame(pca$co)
kable(pca.var)
```

|                      | Comp1      | Comp2      | Comp3      |
|----------------------|------------|------------|------------|
| latent_period        | -0.1580970 | 0.6958418  | 0.3825418  |
| uredinia_size        | 0.9344581  | 0.0729967  | -0.0021118 |
| spore_volume         | -0.0110515 | -0.3672860 | 0.7577132  |
| sporulation_rate     | 0.7473166  | 0.3964454  | 0.2771676  |
| sporulation_capacity | -0.6344263 | 0.4396288  | 0.1862767  |
| mycelium_quantity    | -0.0453659 | -0.4492560 | 0.3995747  |

Spore volume and latent period shape the 2nd axis. Mycelium quantity shapes the 3rd axis. These axes are not explained by experimental variables (LPI, plant and day) but by something else not taken into account in our experimental design.

## Test for experimental data effect on fungus traits: Barplots and GLM

Color gradient

```
cc <- scales::seq_gradient_pal("blue", "red", "Lab")(seq(0,0.9,length.out=8))
```

Data transformation to better fit normality

Error family:

infection efficiency: binomial family

latent period: Gamma family, link= identity

```
shapiro.test(results$uredinia_size) # not normal

##
##  Shapiro-Wilk normality test
##
## data:  results$uredinia_size
## W = 0.93982, p-value = 1.792e-06

shapiro.test(sqrt(results$uredinia_size)) # much better

##
##  Shapiro-Wilk normality test
##
## data:  sqrt(results$uredinia_size)
## W = 0.98341, p-value = 0.04482

shapiro.test(results$spore_volume) # normal

##
##  Shapiro-Wilk normality test
##
## data:  results$spore_volume
## W = 0.98802, p-value = 0.1927

shapiro.test(results$sporulation_rate) # not normal

##
##  Shapiro-Wilk normality test
##
## data:  results$sporulation_rate
## W = 0.93841, p-value = 2.195e-06

shapiro.test(sqrt(results$sporulation_rate)) # normal

##
##  Shapiro-Wilk normality test
##
## data:  sqrt(results$sporulation_rate)
## W = 0.98702, p-value = 0.1466

shapiro.test(results$sporulation_capacity) # not normal

##
##  Shapiro-Wilk normality test
##
```

```

## data: results$sporulation_capacity
## W = 0.54072, p-value < 2.2e-16

shapiro.test(results$mycelium_quantity) # not normal

##
## Shapiro-Wilk normality test
##
## data: results$mycelium_quantity
## W = 0.9178, p-value = 4.876e-08

shapiro.test(sqrt(results$mycelium_quantity)) # normal

##
## Shapiro-Wilk normality test
##
## data: sqrt(results$mycelium_quantity)
## W = 0.98487, p-value = 0.07016

```

uredinia size: square root transformation, Gaussian family  
 spore volume: Gaussian family  
 sporulation rate: square root transformation, Gaussian family  
 sporulation capacity: Gamma family, link= inverse  
 mycelium quantity: square root transformation, Gaussian family

Experimental data effect on infection efficiency

```

# Distribution
hist(results$infection_efficiency, col='blue')

```

Histogram of results\$infection\_efficiency

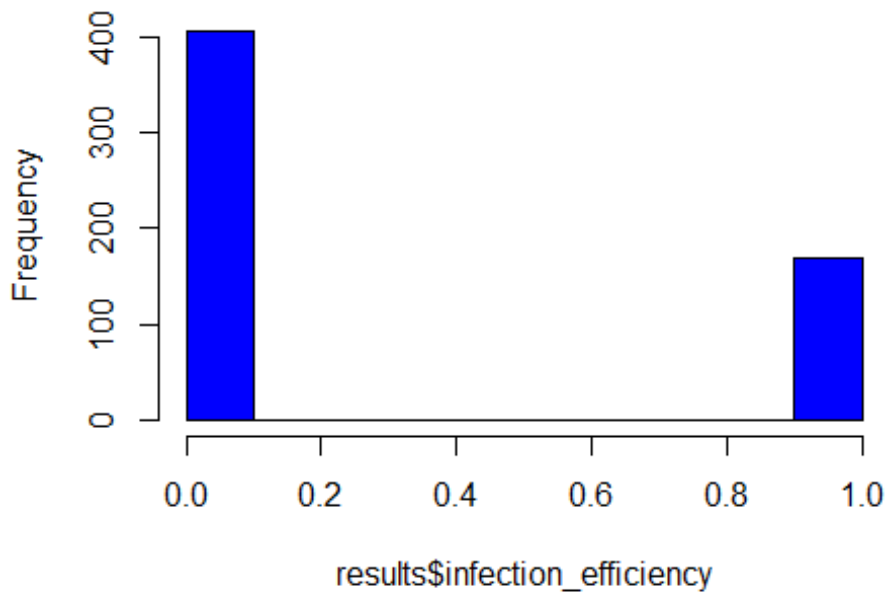

```
# Infection efficiency per LPI
graphe=with(results,bargraph.CI(x.factor=LPI,response=infection_efficiency,
fun=mean,xlab="LPI",ylab="Infection efficiency (%)",main="Infection efficie
ncy for each leaf maturity",col=cc, ylim=c(0,0.5), xpd=T,legend = T, lc=T,u
c=T,ci.fun= function(x) c(mean(x)-se(x), mean(x) + se(x))))
```

Infection efficiency for each leaf maturity

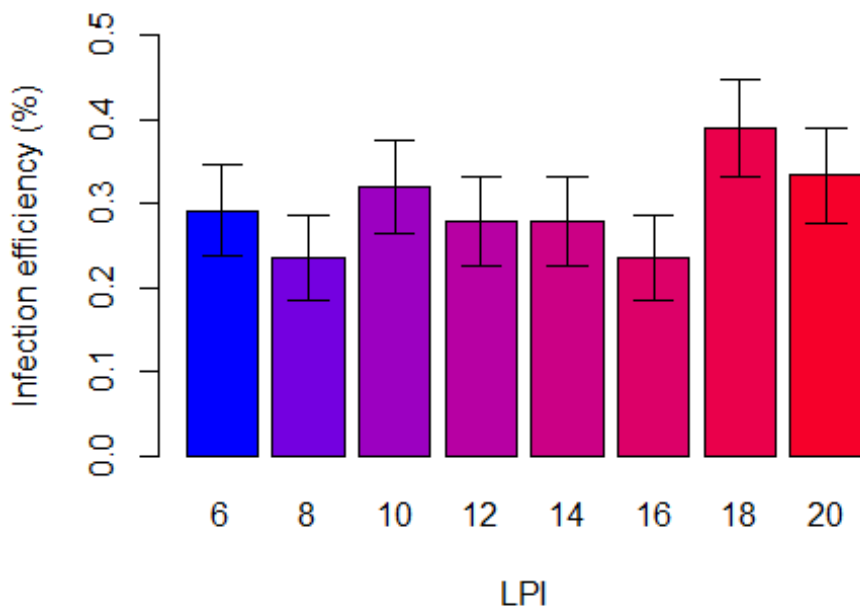



```
# Infection efficiency per plant
graphe=with(results,bargraph.CI(x.factor=plant,response=infection_efficiency,
fun=mean,xlab="Plant",ylab="Infection efficiency (%)",main="Infection efficiency for each plant",col='grey',ylim=c(0,0.5),xpd=T,legend = T, lc=T,uc=T,ci.fun= function(x) c(mean(x)-se(x), mean(x) + se(x))))
```

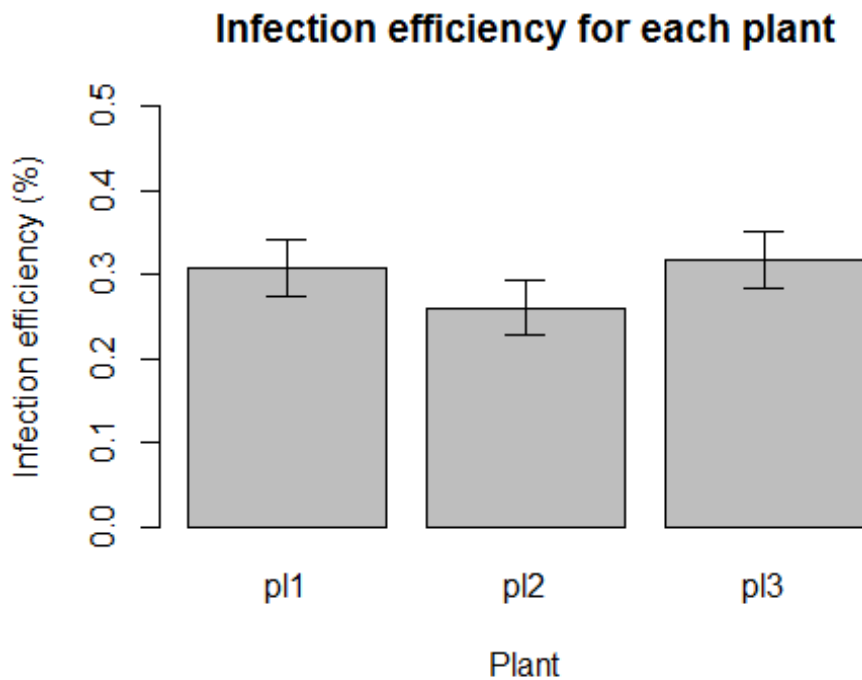

```
# Infection efficiency per inoculation day
graphe=with(results,bargraph.CI(x.factor=day,response=infection_efficiency,
fun=mean,xlab="Day",ylab="Infection efficiency (%)",main="Infection efficiency for each inoculation day",col='grey',ylim=c(0,0.5),xpd=T,legend = T, lc=T,uc=T,ci.fun= function(x) c(mean(x)-se(x), mean(x) + se(x))))
```

## Infection efficiency for each inoculation day

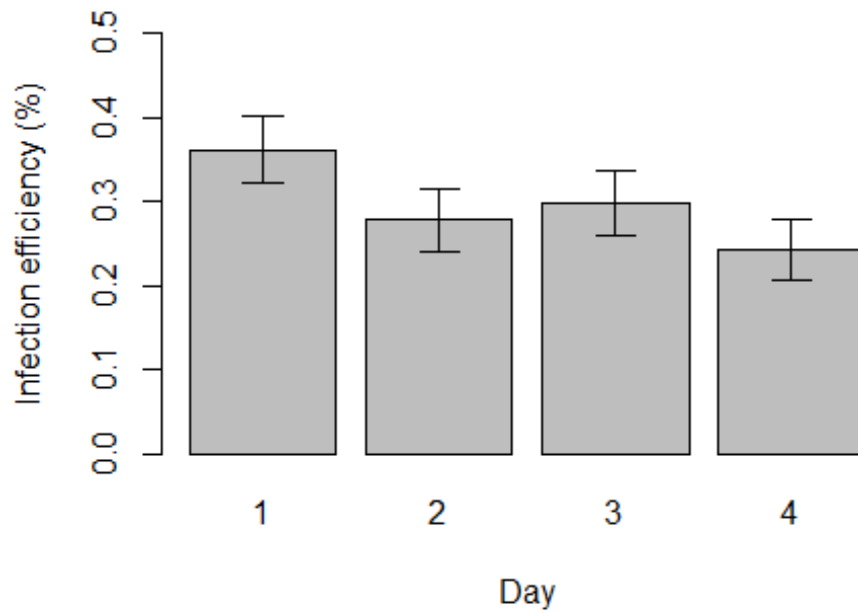

GLM

```
glmeff = glm(infection_efficiency ~ day + LPI*plant, results, family = binomial)
plot(glmeff, ask=F)
```

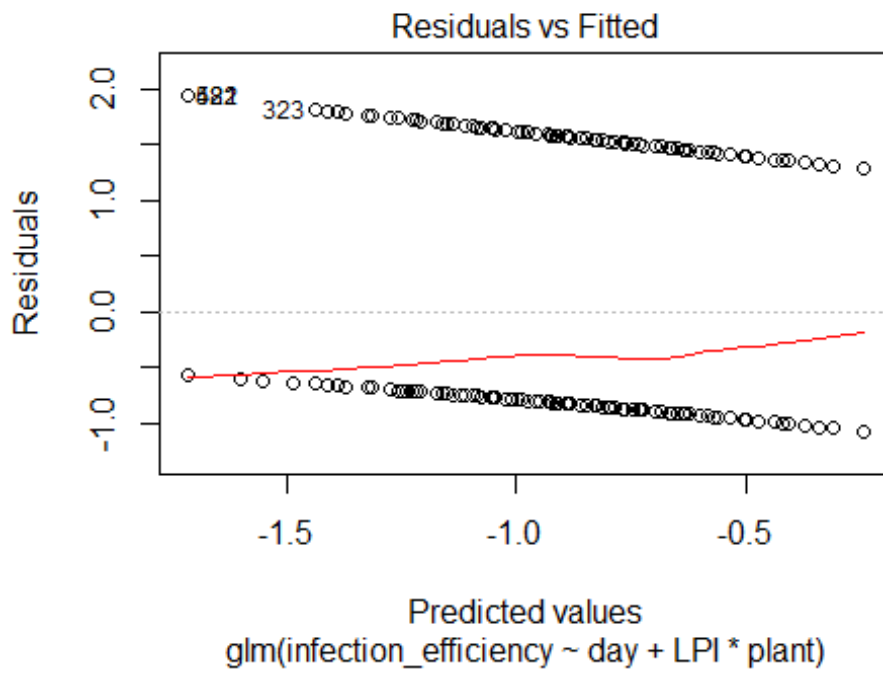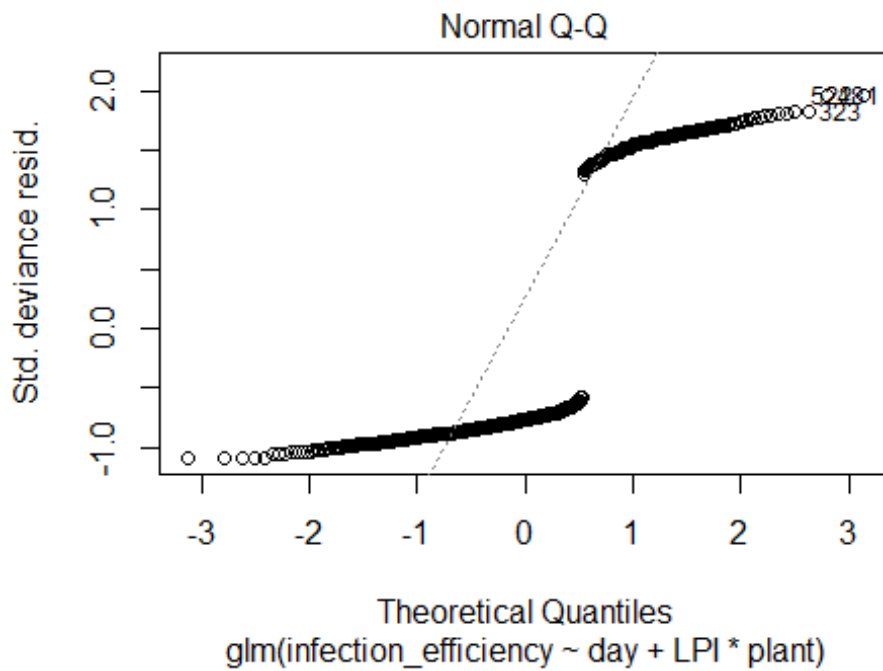

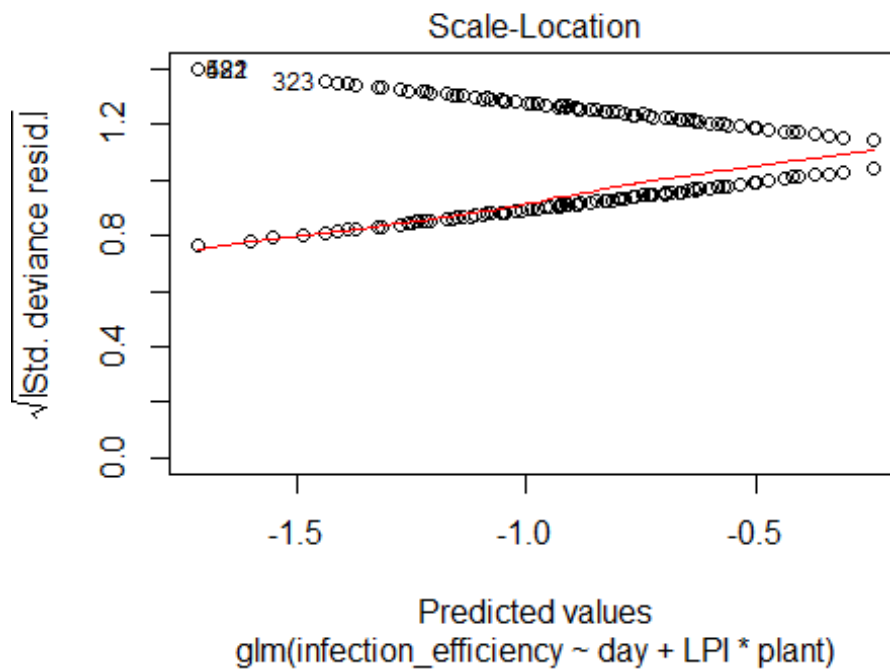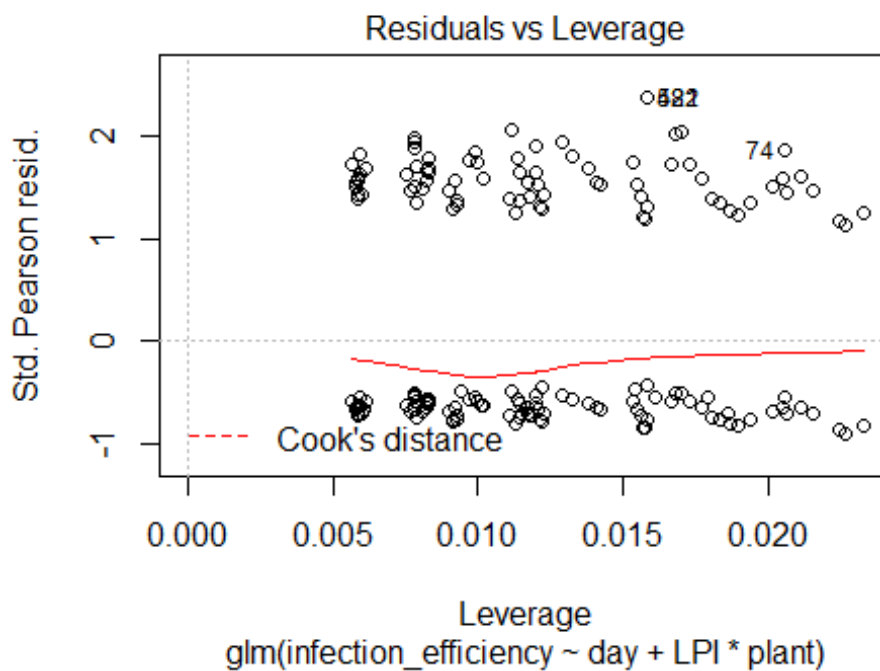

```
summary(glmeff) # Sign : Intercept, day, plant
##
## Call:
## glm(formula = infection_efficiency ~ day + LPI * plant, family = binomial,
##      data = results)
```

```
##
## Deviance Residuals:
##   Min       1Q   Median       3Q      Max
## -1.0754  -0.8738  -0.7607   1.3957   1.9399
##
## Coefficients:
##              Estimate Std. Error z value Pr(>|z|)
## (Intercept) -1.051171   0.527589  -1.992  0.0463 *
## day          -0.162994   0.082825  -1.968  0.0491 *
## LPI           0.048469   0.034643   1.399  0.1618
## plantpl2     -0.358953   0.716938  -0.501  0.6166
## plantpl3      1.090348   0.673628   1.619  0.1055
## LPI:plantpl2  0.009178    0.050390   0.182  0.8555
## LPI:plantpl3 -0.079680   0.048616  -1.639  0.1012
## ---
## Signif. codes:  0 '***' 0.001 '**' 0.01 '*' 0.05 '.' 0.1 ' ' 1
##
## (Dispersion parameter for binomial family taken to be 1)
##
##   Null deviance: 698.91  on 575  degrees of freedom
## Residual deviance: 687.96  on 569  degrees of freedom
## AIC: 701.96
##
## Number of Fisher Scoring iterations: 4

aov.eff <- anova(glmeff, test="Chisq")
kable(aov.eff) # Sign: None
```

|           | Df | Deviance | Resid. Df | Resid. Dev | Pr(>Chi)  |
|-----------|----|----------|-----------|------------|-----------|
| NULL      | NA | NA       | 575       | 698.9058   | NA        |
| day       | 1  | 3.854980 | 574       | 695.0508   | 0.0495985 |
| LPI       | 1  | 1.347044 | 573       | 693.7038   | 0.2457956 |
| plant     | 2  | 1.754594 | 571       | 691.9492   | 0.4159056 |
| LPI:plant | 2  | 3.992344 | 569       | 687.9568   | 0.1358544 |

No experimental effect on infection efficiency.

Experimental data effect on latent period

```
# Distribution
hist(results$latent_period, col='blue')
```

### Histogram of results\$latent\_period

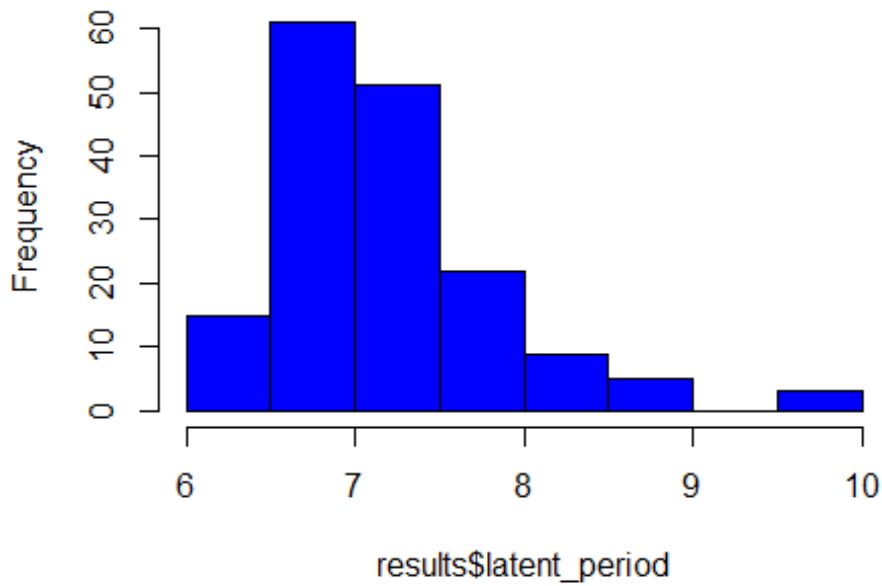

```
# Latent period per LPI
```

```
graphe=with(resna,bargraph.CI(x.factor=LPI,response=latent_period,fun=mean,  
xlab="LPI",ylab="Latent period (days)",main="Latent period for each leaf ma  
turity",col=cc,xpd=F,legend = T, lc=T,uc=T, ylim=c(5,9),ci.fun= function(x)  
c(mean(x)-se(x), mean(x) + se(x))))
```

### Latent period for each leaf maturity

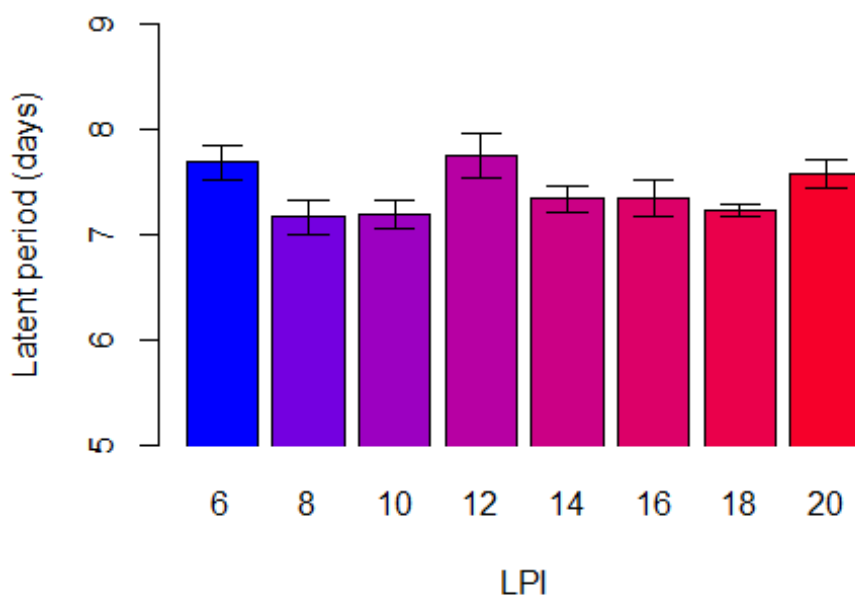

```
# Latent period per plant
graphe=with(resna,bargraph.CI(x.factor=plant,response=latent_period,fun=mean,xlab="Plant",ylab="Latent period (days)",main="Latent period for each plant",col='grey',xpd=F,legend = T, lc=T,uc=T, ylim=c(5,9),ci.fun= function(x) c(mean(x)-se(x), mean(x) + se(x))))
```

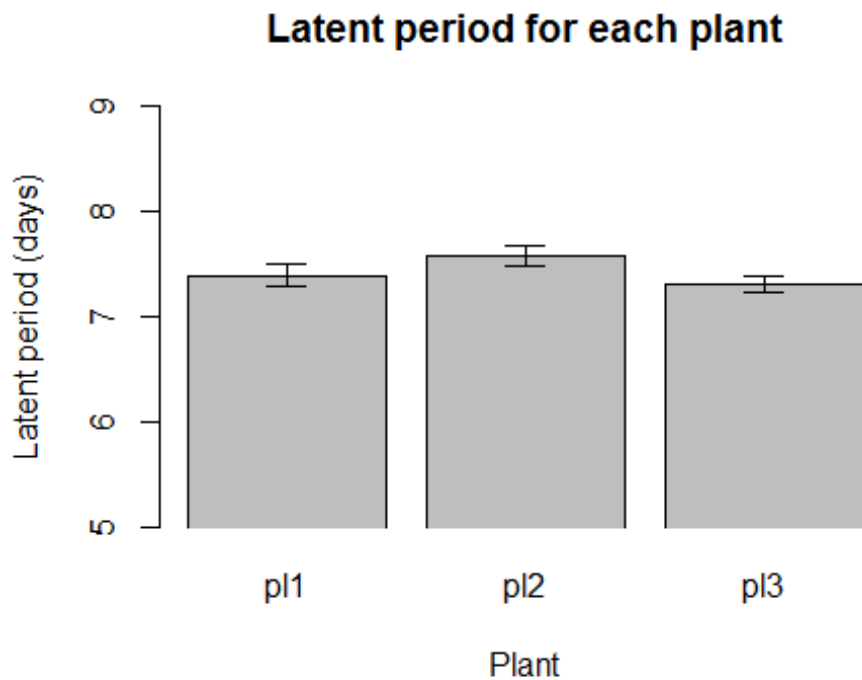

```
# Latent period per inoculation day
graphe=with(resna,bargraph.CI(x.factor=day,response=latent_period,fun=mean,xlab="Day",ylab="Latent period (days)",main="Latent period for each inoculation day",col='grey',xpd=F,legend = T, lc=T,uc=T, ylim=c(5,9),ci.fun= function(x) c(mean(x)-se(x), mean(x) + se(x))))
```

## Latent period for each inoculation day

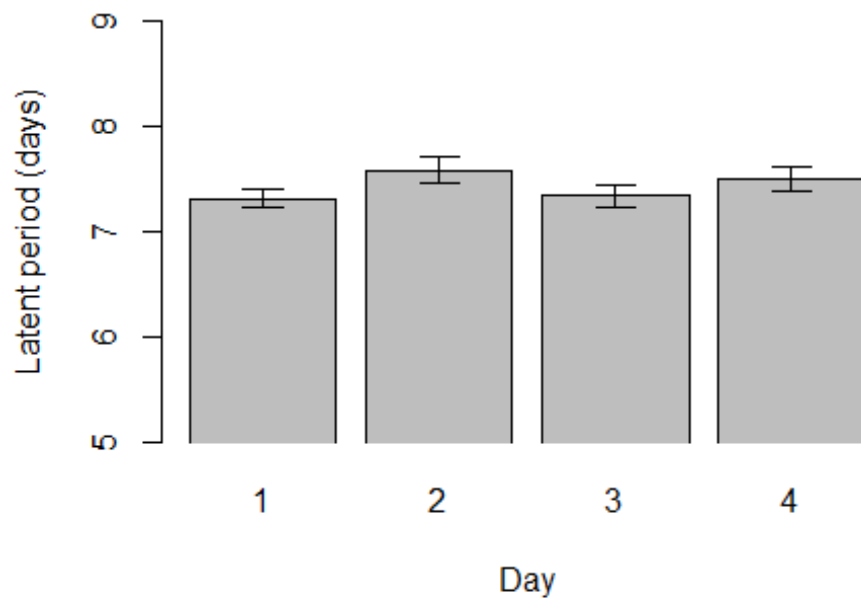

GLM

```
glmlat = glm(latent_period ~ day + LPI*plant, results, family = Gamma(link=identity))  
plot(glmlat, ask=F)
```



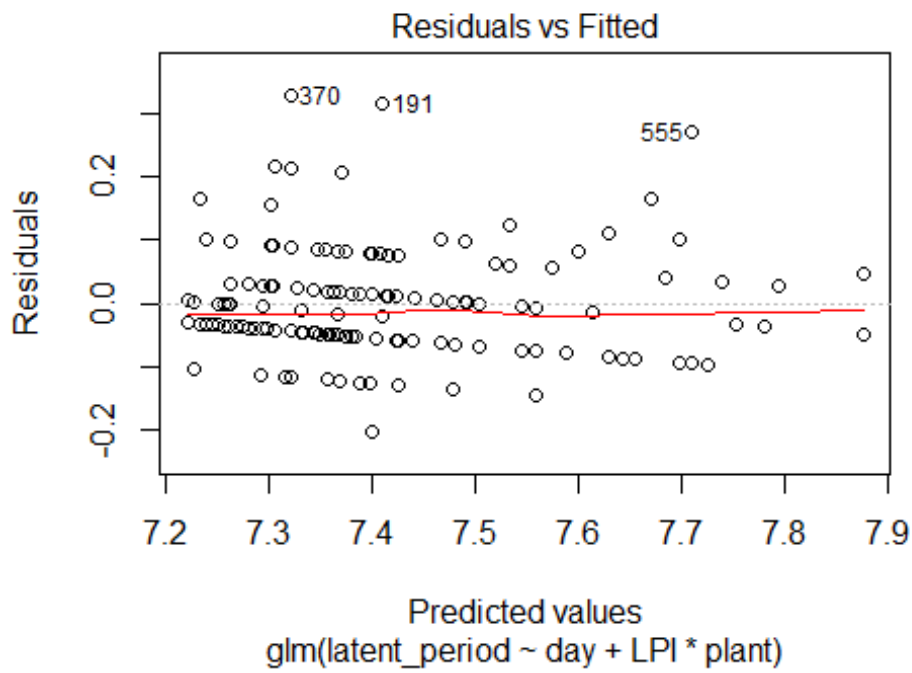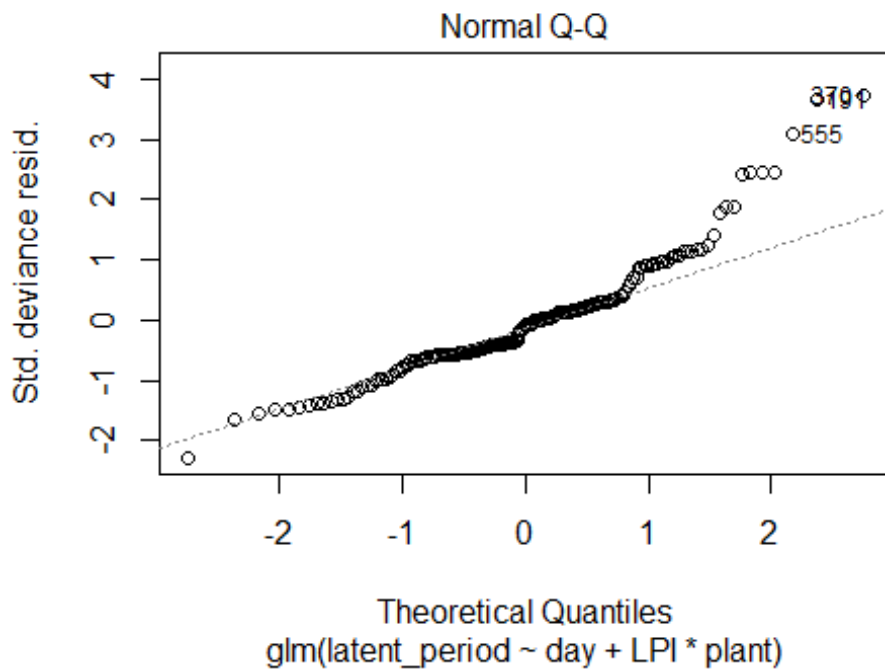

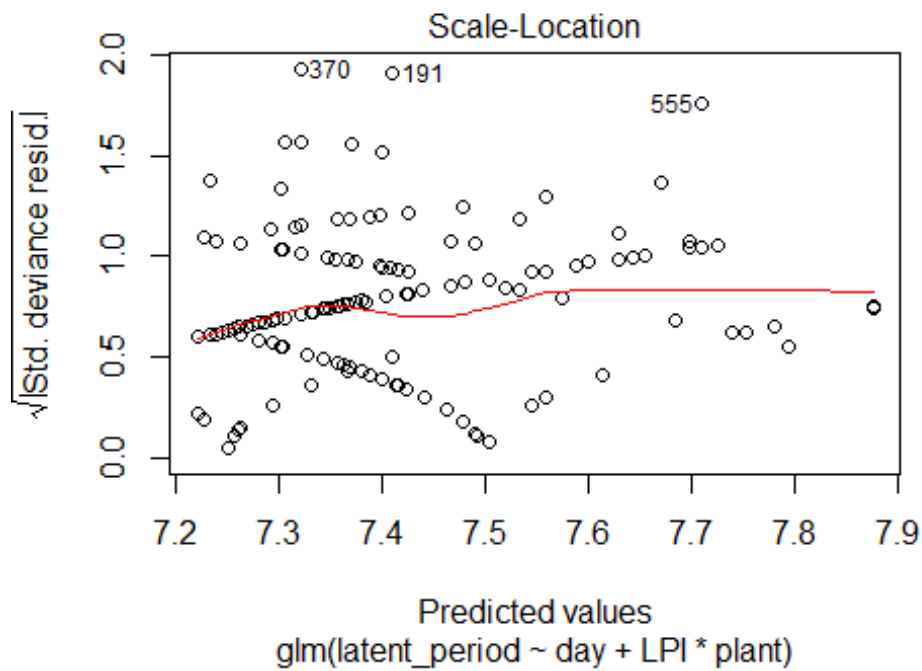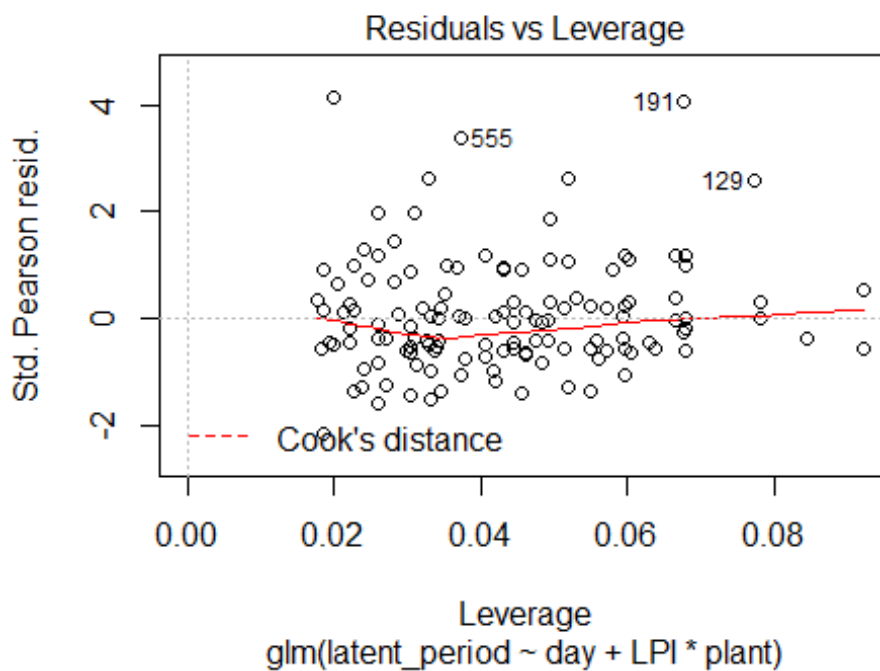

```
summary(glm1at) # Sign : Intercept
##
## Call:
## glm(formula = latent_period ~ day + LPI * plant, family = Gamma(link = i
dentify),
##   data = results)
```

```
##
## Deviance Residuals:
##      Min        1Q      Median        3Q        Max
## -0.20271  -0.05140  -0.00952   0.02678   0.32892
##
## Coefficients:
##              Estimate Std. Error t value Pr(>|t|)
## (Intercept)   7.367096   0.296804  24.821  <2e-16 ***
## day           0.040862   0.046537   0.878   0.381
## LPI          -0.006368   0.019083  -0.334   0.739
## plantpl2     0.510198   0.416502   1.225   0.222
## plantpl3    -0.205383   0.364056  -0.564   0.573
## LPI:plantpl2 -0.021166   0.028456  -0.744   0.458
## LPI:plantpl3  0.009429   0.026138   0.361   0.719
## ---
## Signif. codes:  0 '***' 0.001 '**' 0.01 '*' 0.05 '.' 0.1 ' ' 1
##
## (Dispersion parameter for Gamma family taken to be 0.007991393)
##
##      Null deviance: 1.2558  on 165  degrees of freedom
## Residual deviance: 1.1912  on 159  degrees of freedom
## (410 observations deleted due to missingness)
## AIC: 331.55
##
## Number of Fisher Scoring iterations: 4

aov.lat <- anova(glmLat, test="Chisq")
kable(aov.lat) # Sign: none
```

|           | Df | Deviance  | Resid. Df | Resid. Dev | Pr(>Chi)  |
|-----------|----|-----------|-----------|------------|-----------|
| NULL      | NA | NA        | 165       | 1.255796   | NA        |
| day       | 1  | 0.0050837 | 164       | 1.250713   | 0.4251101 |
| LPI       | 1  | 0.0024763 | 163       | 1.248236   | 0.5777575 |
| plant     | 2  | 0.0470148 | 161       | 1.201222   | 0.0527818 |
| LPI:plant | 2  | 0.0099845 | 159       | 1.191237   | 0.5354210 |

No experimental effect of latent period.

Experimental data effect on uredinia size

```
# Distribution
hist(results$uredinia_size, col='blue')
```

Histogram of results\$uredinia\_size

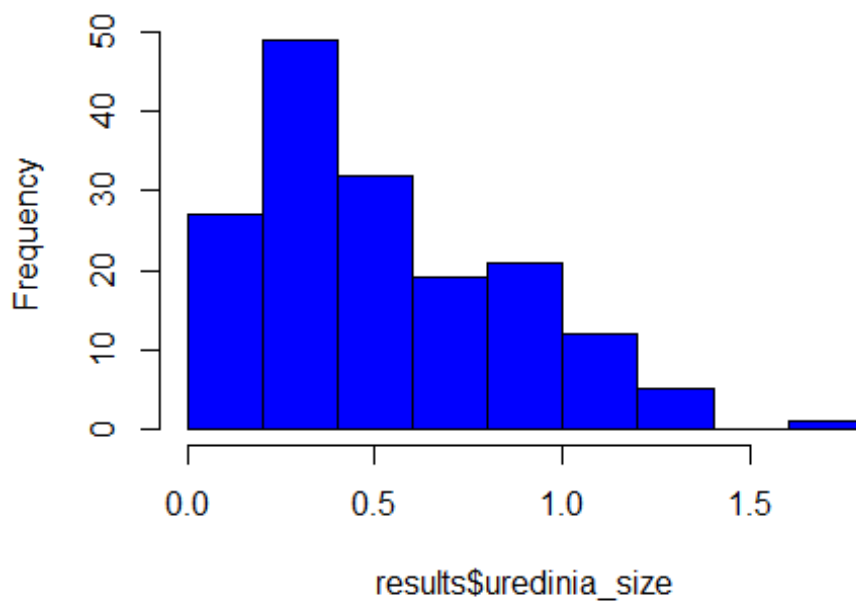

```
# Uredinia size per LPI
graphe=with(resna,bargraph.CI(x.factor=LPI,response=uredinia_size,fun=mean,
xlab="LPI",ylab="Uredinia size (mm2)", main="Uredinia size for each leaf ma
turity", col=cc, ylim=c(0,1), xpd=T,legend = T, lc=T,uc=T, ci.fun= function
(x) c(mean(x)-se(x), mean(x) + se(x))))
text(graphe$xvals,graphe$vals+0.15,c('c', 'c', 'c', 'bc', 'bc', 'ab', 'a',
'ab')) # add Tukey coefficients
```

### Uredinia size for each leaf maturity

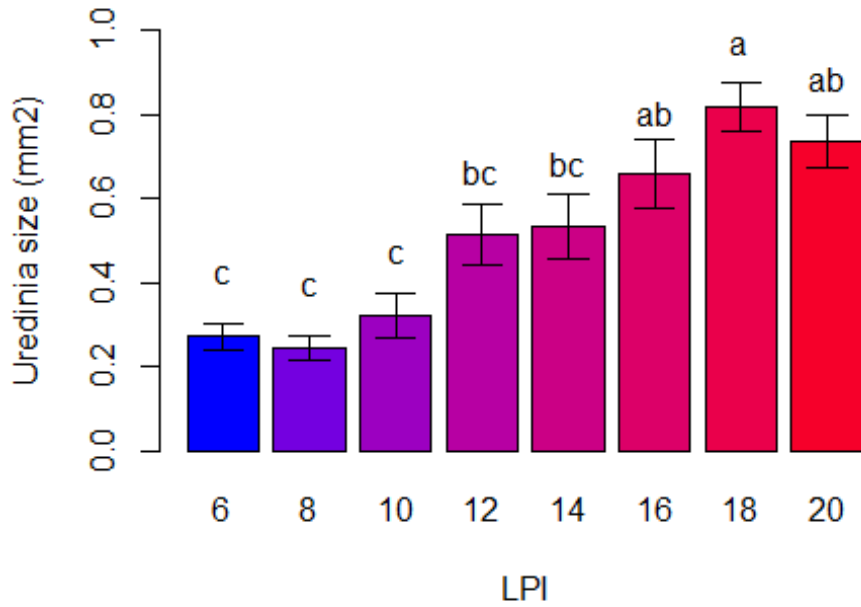

# Uredinia size per plant

```
graphe=with(resna,bargraph.CI(x.factor=plant,response=uredinia_size,fun=mean,xlab="Plant",ylab="Uredinia size mm2"),main="Uredinia size for each plant", col='grey', ylim=c(0,1), xpd=T,legend = T, lc=T,uc=T, ci.fun= function(x) c(mean(x)-se(x), mean(x) + se(x))))
```

### Uredinia size for each plant

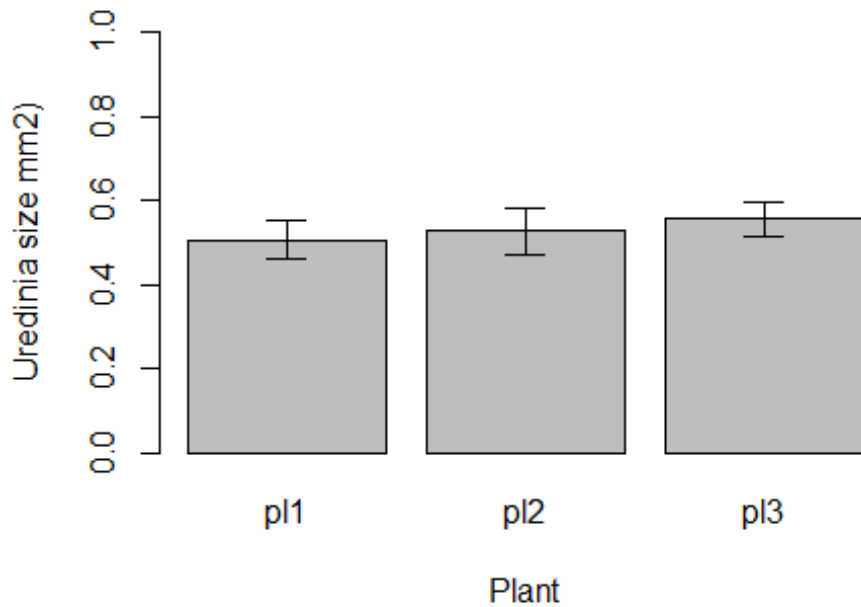

```
# Uredinia size per inoculation day
graphe=with(resna,bargraph.CI(x.factor=day,response=uredinia_size,fun=mean,
xlab="Day",ylab="Uredinia size (mm2)",main="Uredinia size for each inoculat
ion day", col='grey', ylim=c(0,1), xpd=T,legend = T, lc=T,uc=T, ci.fun= fun
ction(x) c(mean(x)-se(x), mean(x) + se(x))))
```

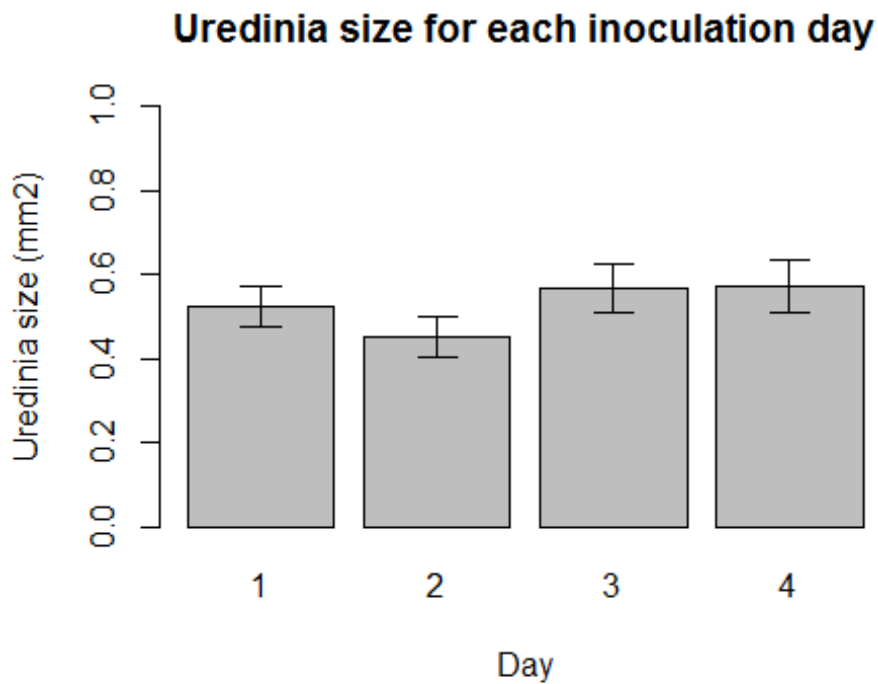

GLM

```
glmus = glm(sqrt(uredinia_size) ~ day + LPI*plant, results, family = gaussian)
plot(glmus, ask=F)
```

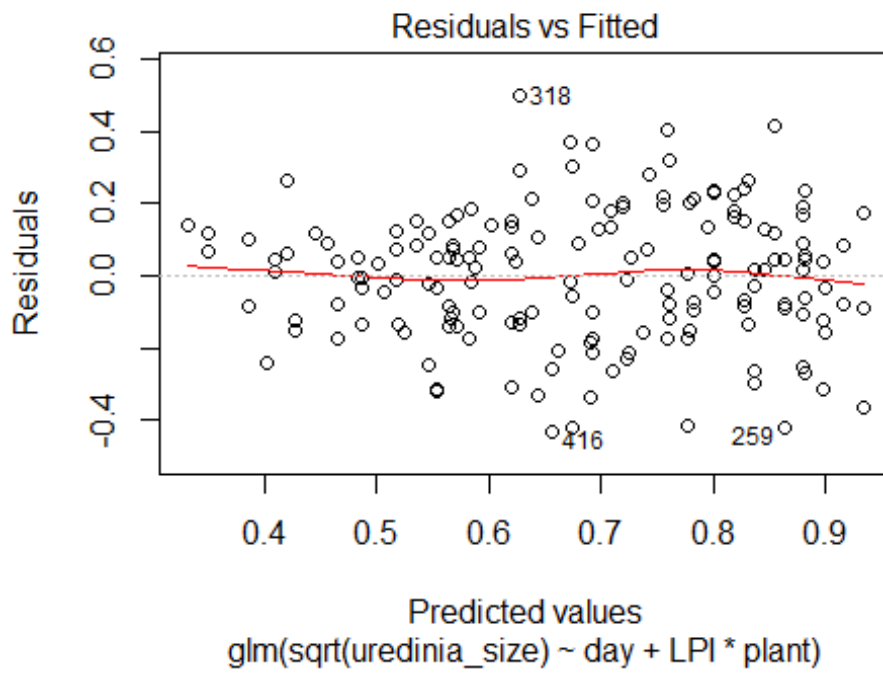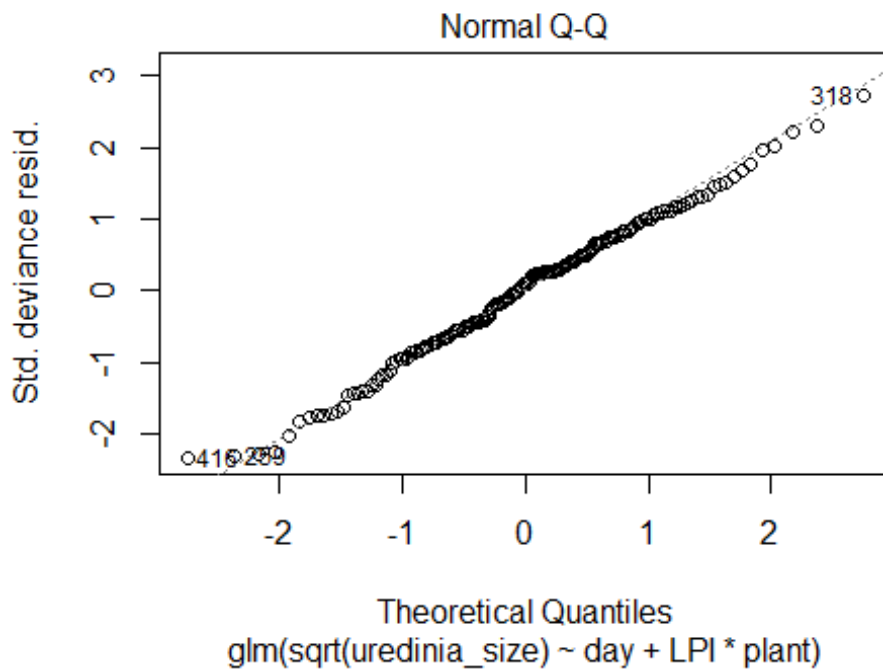

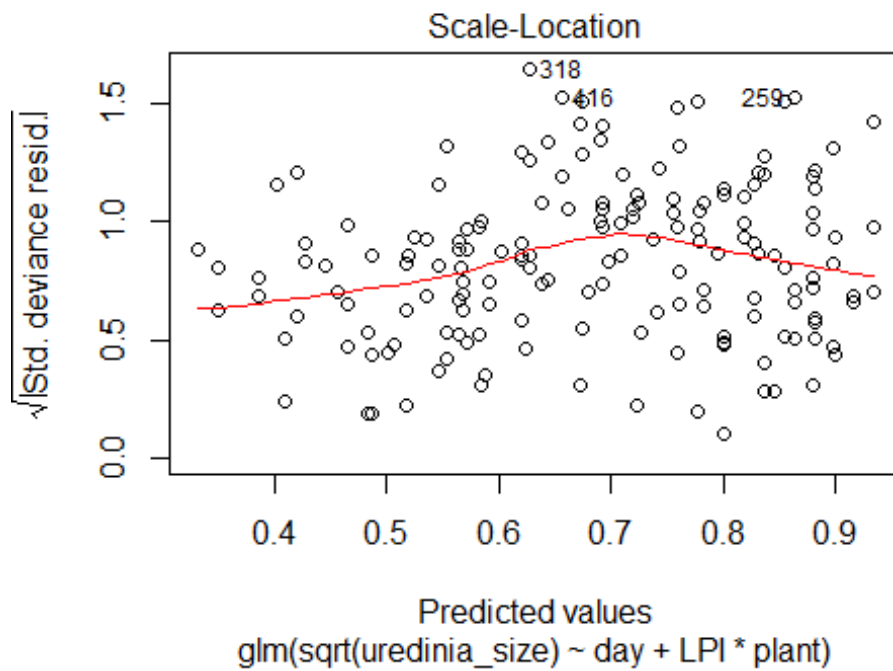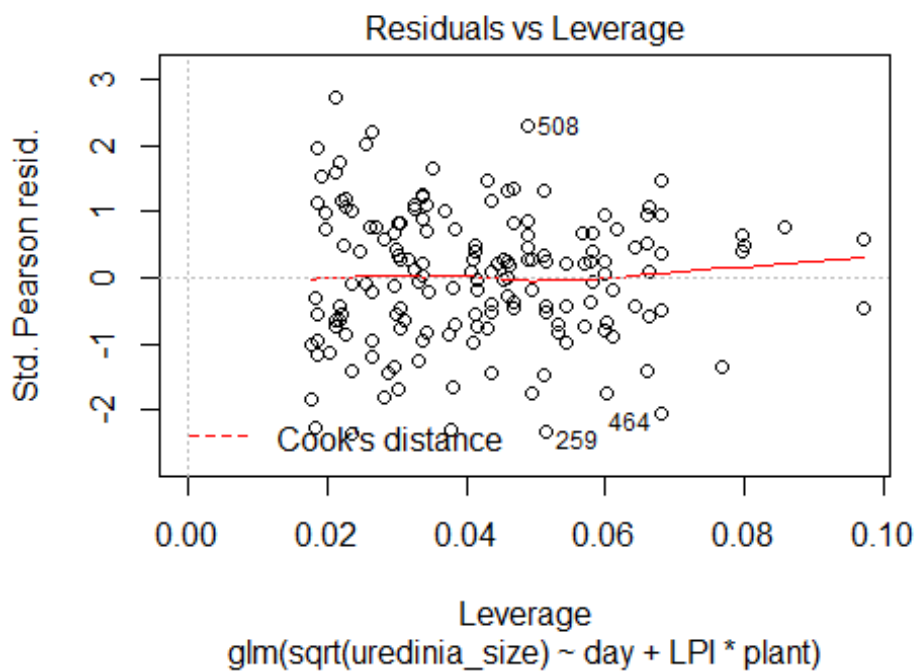

```
summary(glmus) # Sign : LPI
##
## Call:
## glm(formula = sqrt(uredinia_size) ~ day + LPI * plant, family = gaussian
##     data = results)
```



```
##
## Deviance Residuals:
##      Min        1Q      Median        3Q        Max
## -0.43038 -0.12384  0.01469  0.13009  0.49962
##
## Coefficients:
##              Estimate Std. Error t value Pr(>|t|)
## (Intercept)  0.194478  0.083547  2.328  0.0212 *
## day          0.018056  0.013060  1.383  0.1687
## LPI          0.031655  0.005383  5.881 2.33e-08 ***
## plantpl2    -0.115543  0.114705 -1.007  0.3153
## plantpl3     0.149476  0.103124  1.449  0.1492
## LPI:plantpl2 0.007458  0.007885  0.946  0.3456
## LPI:plantpl3 -0.005764  0.007414 -0.777  0.4380
## ---
## Signif. codes:  0 '***' 0.001 '**' 0.01 '*' 0.05 '.' 0.1 ' ' 1
##
## (Dispersion parameter for gaussian family taken to be 0.0346197)
##
##      Null deviance: 9.3355  on 165  degrees of freedom
## Residual deviance: 5.5045  on 159  degrees of freedom
## (410 observations deleted due to missingness)
## AIC: -78.377
##
## Number of Fisher Scoring iterations: 2

aov.us <- anova(glmus, test="Chisq")
kable(aov.us) # LPI***
```

|           | Df | Deviance  | Resid. Df | Resid. Dev | Pr(>Chi)  |
|-----------|----|-----------|-----------|------------|-----------|
| NULL      | NA | NA        | 165       | 9.335536   | NA        |
| day       | 1  | 0.0767535 | 164       | 9.258783   | 0.1364938 |
| LPI       | 1  | 3.3899649 | 163       | 5.868818   | 0.0000000 |
| plant     | 2  | 0.2623572 | 161       | 5.606460   | 0.0226152 |
| LPI:plant | 2  | 0.1019284 | 159       | 5.504532   | 0.2294396 |

```
Tukey_LPI <- HSD.test(glmus, "LPI", group=TRUE, main="Uredinia size for each LPI")
kable(Tukey_LPI$groups)
```

|    | sqrt(uredinia_size) | groups |
|----|---------------------|--------|
| 18 | 0.8772363           | a      |
| 20 | 0.8423182           | ab     |
| 16 | 0.7827109           | ab     |
| 12 | 0.6872449           | bc     |

|    |           |     |
|----|-----------|-----|
| 14 | 0.6759903 | bcd |
| 10 | 0.5297664 | cde |
| 6  | 0.4978778 | de  |
| 8  | 0.4813555 | e   |

LPI effect on uredinia size.

Experimental data effect on spore volume

```
# Distribution
hist(results$spore_volume, col='blue')
```

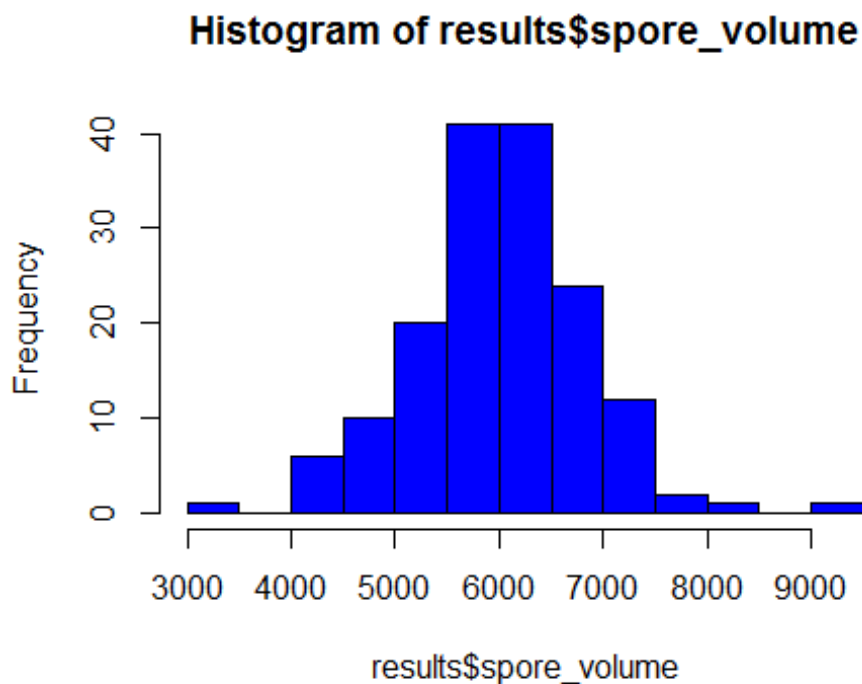

```
# Spore volume per LPI
graphe=with(resna,bargraph.CI(x.factor=LPI,response=spore_volume,fun=mean,x
lab="LPI",ylab="Spore volume ()",main="Spore volume for each leaf maturity"
, col='forestgreen',ylim=c(0,9000),xpd=T,legend = T, lc=T,uc=T, ci.fun= fun
ction(x) c(mean(x)-se(x), mean(x) + se(x))))
```

## Spore volume for each leaf maturity

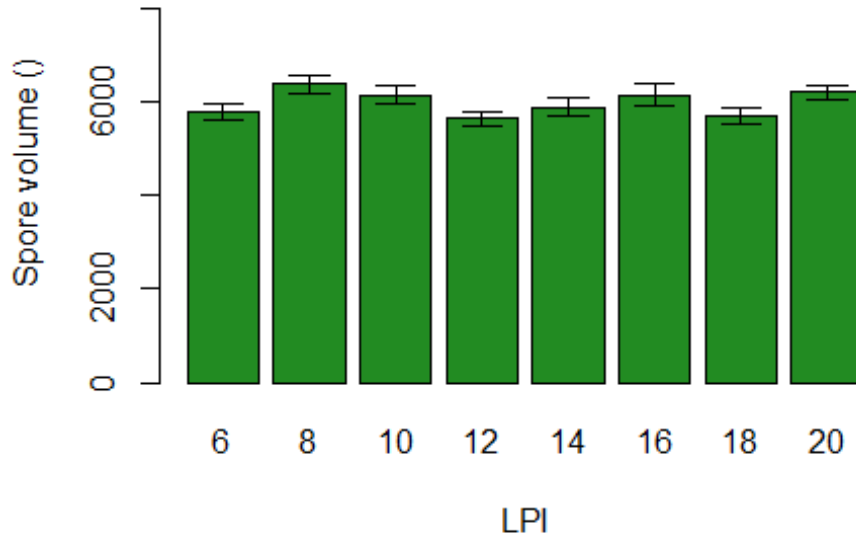

```
# Spore volume per plant
```

```
graphe=with(resna,bargraph.CI(x.factor=plant,response=spore_volume,fun=mean,  
,xlab="Plant",ylab="Spore volume ()",main="Spore volume for each plant",col  
'grey',ylim=c(0,9000),xpd=T,legend = T, lc=T,uc=T, ci.fun= function(x) c(m  
ean(x)-se(x), mean(x) + se(x))))
```

## Spore volume for each plant

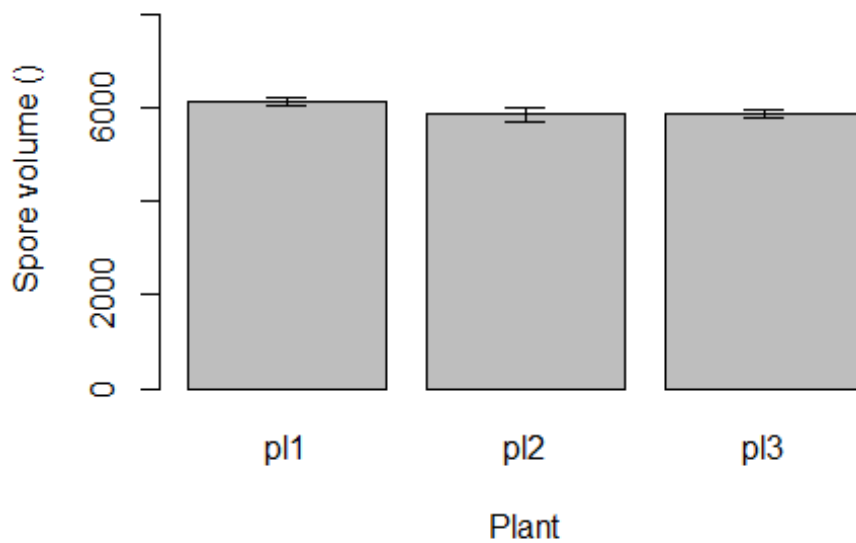

```
# Spore volume per inoculation day
graphe=with(resna,bargraph.CI(x.factor=day,response=spore_volume,fun=mean,x
lab="Day",ylab="Spore volume ()",main="Spore volume for each inoculation da
y", col='grey', ylim=c(0,9000), xpd=T,legend = T, lc=T,uc=T, ci.fun= functi
on(x) c(mean(x)-se(x), mean(x) + se(x))))
```

### Spore volume for each inoculation day

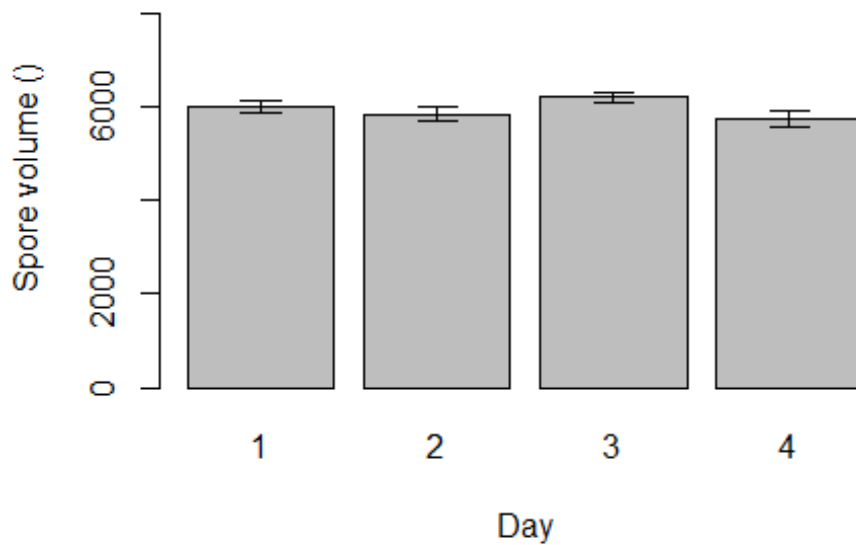

GLM

```
glmvol = glm(spore_volume ~ day + LPI*plant, results, family = gaussian)
plot(glmvol, ask=F)
```

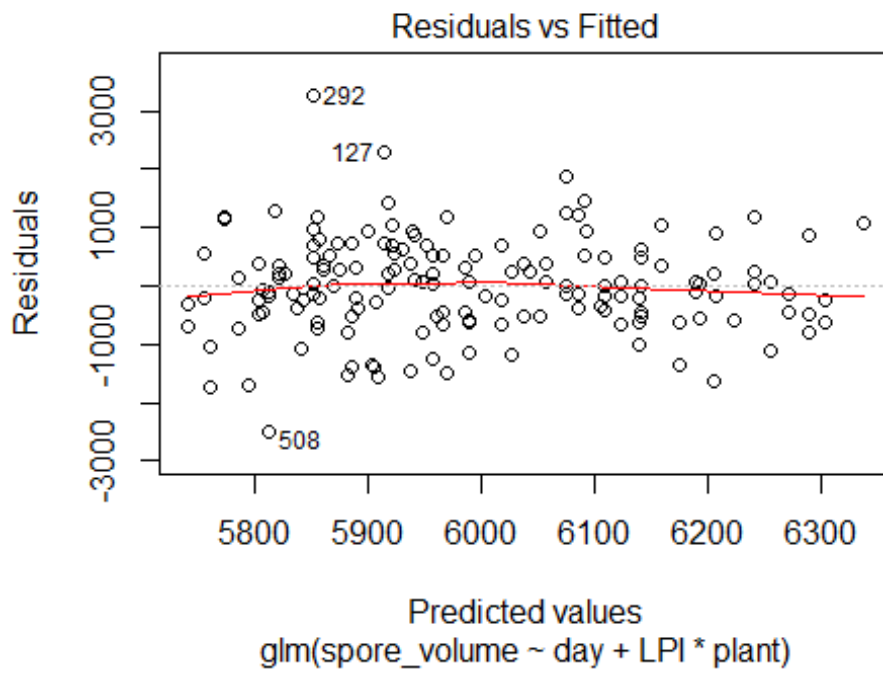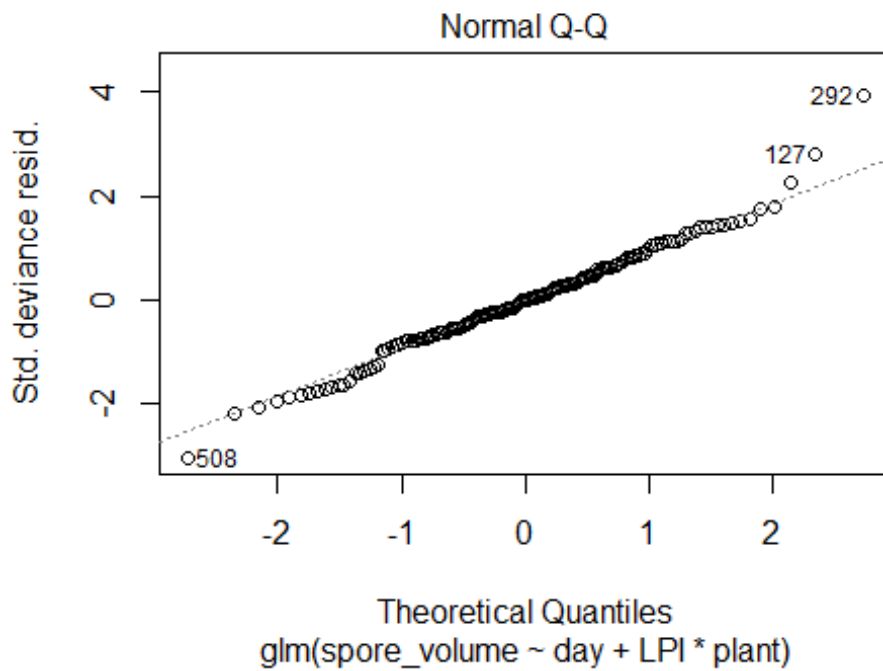

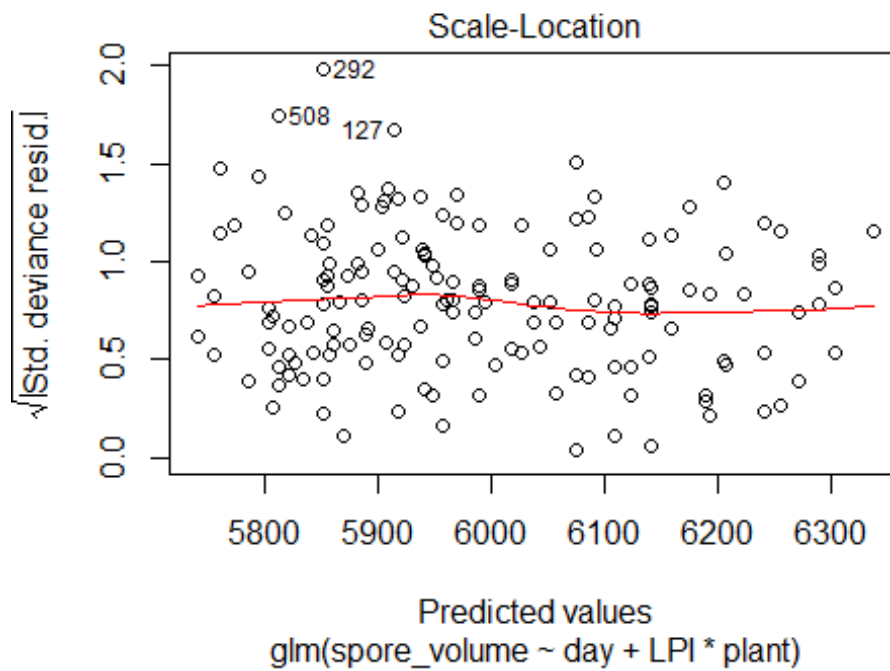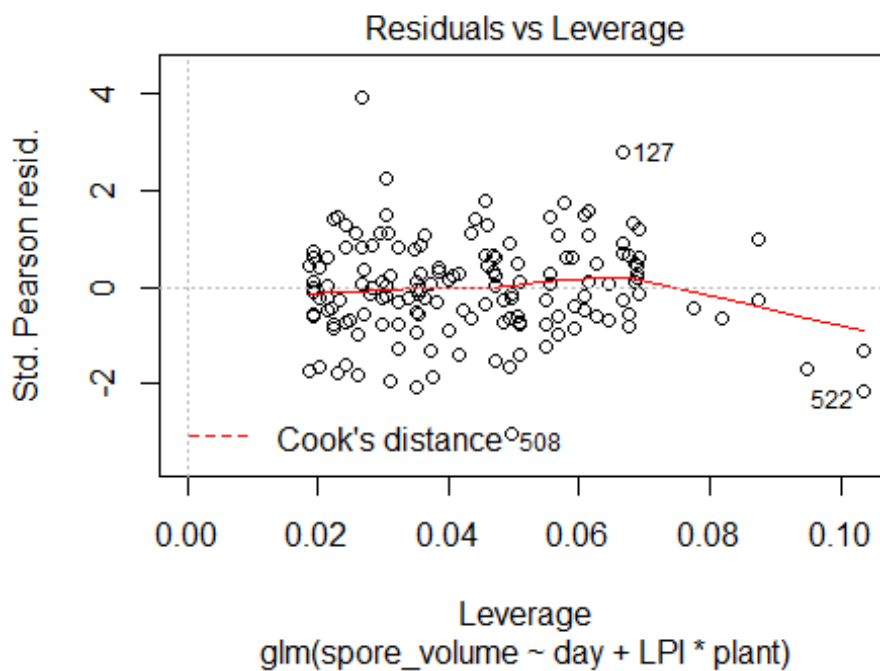

```
summary(glmvol) # Sign : Intercept
##
## Call:
## glm(formula = spore_volume ~ day + LPI * plant, family = gaussian,
##      data = results)
##
```

```

## Deviance Residuals:
##      Min       1Q   Median       3Q      Max
## -2486.2  -516.1     1.4    512.4   3257.5
##
## Coefficients:
##              Estimate Std. Error t value Pr(>|t|)
## (Intercept)   6054.69    381.32  15.878 <2e-16 ***
## day           -48.26     60.49  -0.798  0.426
## LPI            16.52     25.00   0.661  0.510
## plantpl2     -128.87    532.64  -0.242  0.809
## plantpl3      178.73    473.62   0.377  0.706
## LPI:plantpl2  -12.12     36.58  -0.331  0.741
## LPI:plantpl3  -33.24     34.34  -0.968  0.335
## ---
## Signif. codes:  0 '***' 0.001 '**' 0.01 '*' 0.05 '.' 0.1 ' ' 1
##
## (Dispersion parameter for gaussian family taken to be 708260.9)
##
##      Null deviance: 111235622  on 158  degrees of freedom
## Residual deviance: 107655664  on 152  degrees of freedom
## (417 observations deleted due to missingness)
## AIC: 2601.9
##
## Number of Fisher Scoring iterations: 2

aov.vol <- anova(glmvol, test="Chisq")
kable(aov.vol) # Sign: non

```

|           | Df | Deviance    | Resid. Df | Resid. Dev | Pr(>Chi)  |
|-----------|----|-------------|-----------|------------|-----------|
| NULL      | NA | NA          | 158       | 111235622  | NA        |
| day       | 1  | 247095.924  | 157       | 110988526  | 0.5547495 |
| LPI       | 1  | 3317.049    | 156       | 110985209  | 0.9454392 |
| plant     | 2  | 2644704.792 | 154       | 108340505  | 0.1545804 |
| LPI:plant | 2  | 684841.000  | 152       | 107655664  | 0.6166420 |

No effect of environmental factor on spore volume.

Experimental data effect on sporulation rate

```

# Distribution
hist(results$sporulation_rate, col='blue')

```

Histogram of results\$sporulation\_rate

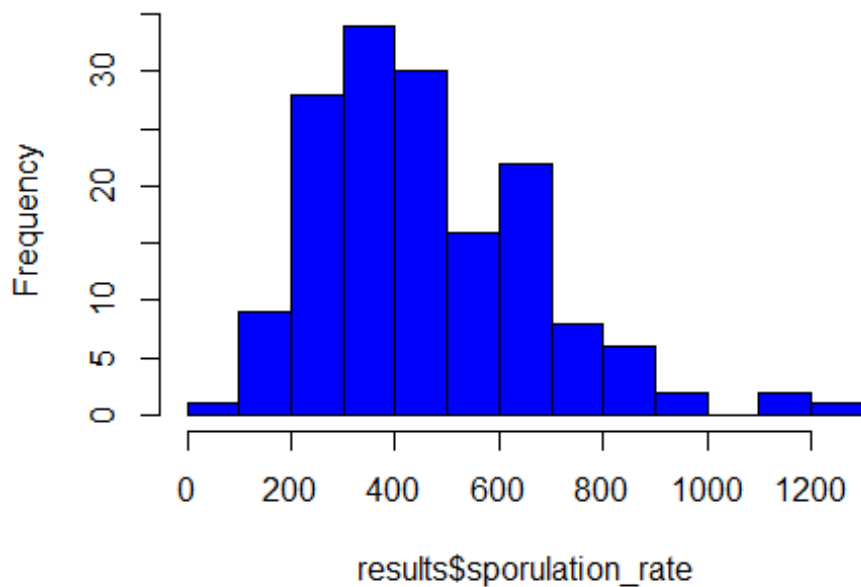

```
# Sporulation rate per LPI
graphe=with(resna,bargraph.CI(x.factor=LPI,response=sporulation_rate,fun=me
an,xlab="LPI",ylab="Sporulation rate (urediniospore/day)",main="Sporulation
rate for each leaf maturity", ylim=c(0,1000), col=cc, xpd=T,legend = T, lc=
T,uc=T, ci.fun= function(x) c(mean(x)-se(x), mean(x) + se(x))))
text(graphe$xvals,graphe$vals+300,c("c","c","c","bc","abc","ab","ab","a"))
# add Tukey coefficients
```



### Sporulation rate for each leaf maturity

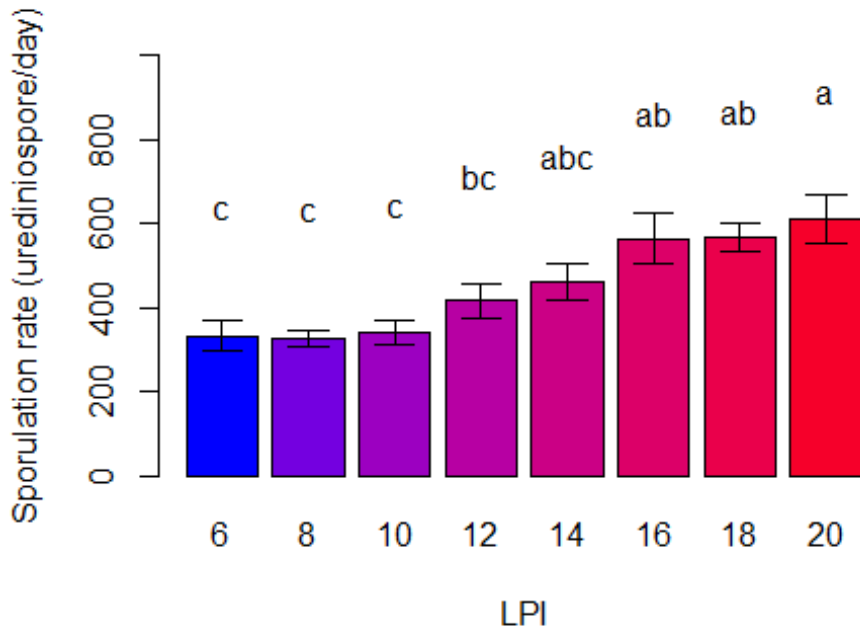

```
# Sporulation rate per plant
graphe=with(resna,bargraph.CI(x.factor=plant,response=sporulation_rate,fun=
mean,xlab="Plant",ylab="Sporulation rate (urediniospore/uredinia/day)",main
="Sporulation rate for each plant",ylim=c(0,1000),col='grey',xpd=T,legend =
T, lc=T,uc=T, ci.fun= function(x) c(mean(x)-se(x), mean(x) + se(x))))
text(graphe$xvals,graphe$vals+300,c("ab","b","a")) # add Tukey coefficients
```

### Sporulation rate for each plant

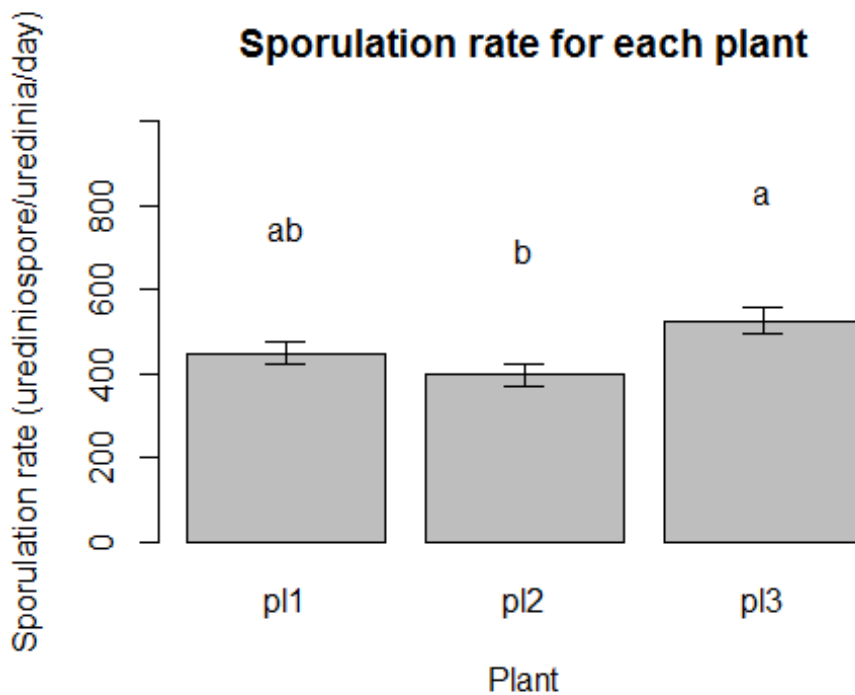

```
# Sporulation rate per inoculation day
graphe=with(resna,bargraph.CI(x.factor=day,response=sporulation_rate,fun=mean,xlab="Day",ylab="Sporulation rate (urediniospore/uredinia/day)",main="Sporulation rate for each inoculation day",ylim=c(0,1000),col='grey',xpd=T,legend = T, lc=T,uc=T, ci.fun= function(x) c(mean(x)-se(x), mean(x) + se(x)))
)
```

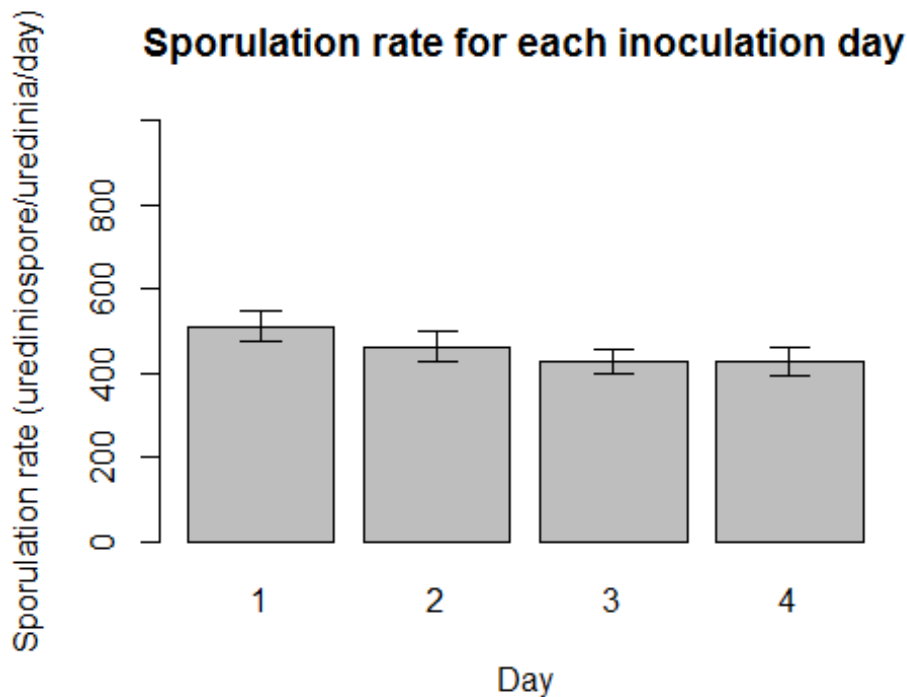

GLM

```
glmrate = glm(sqrt(sporulation_rate) ~ day+LPI*plant, results, family = gaussian)
plot(glmrate, ask=F)
```

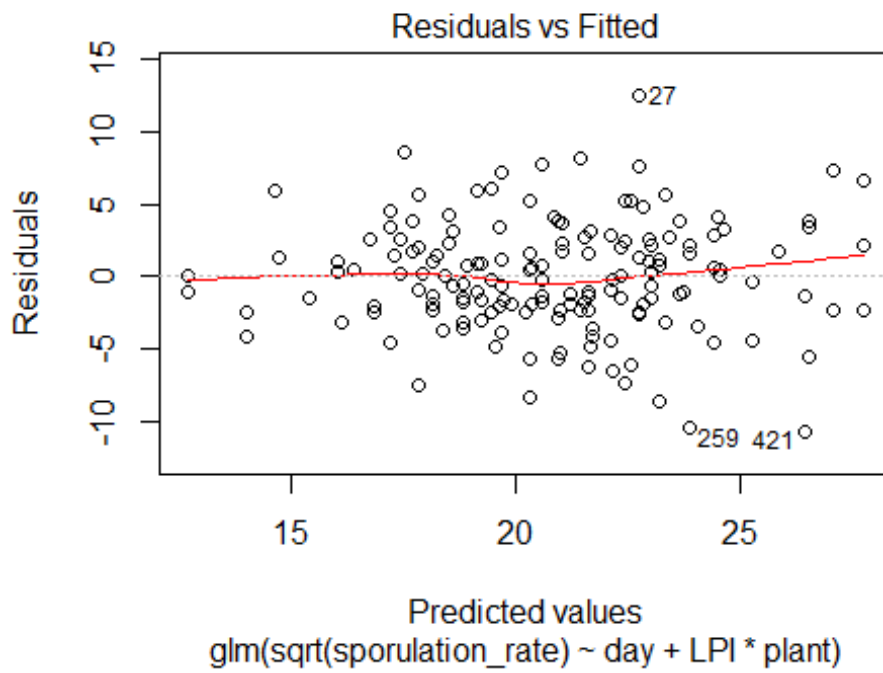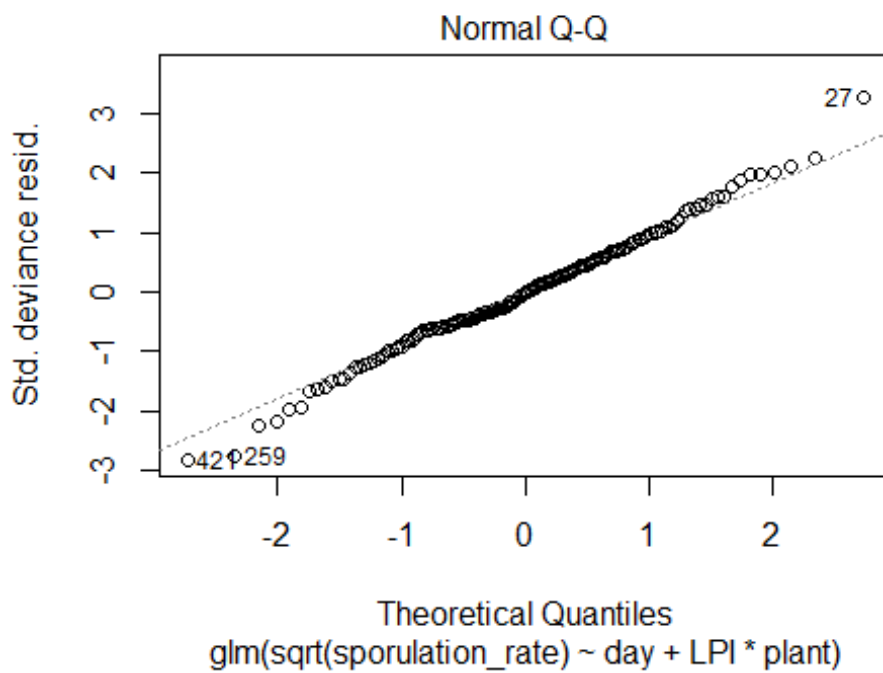

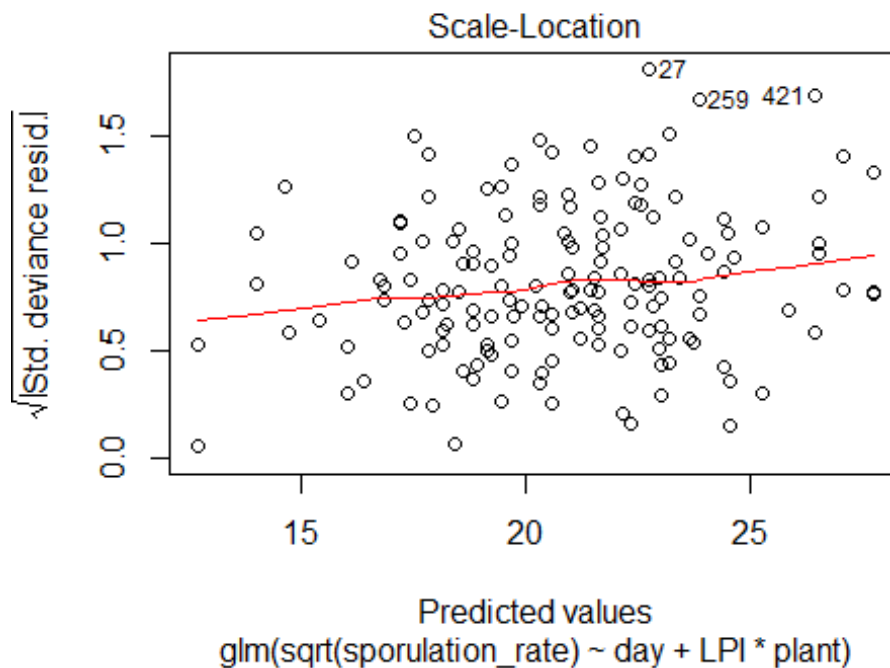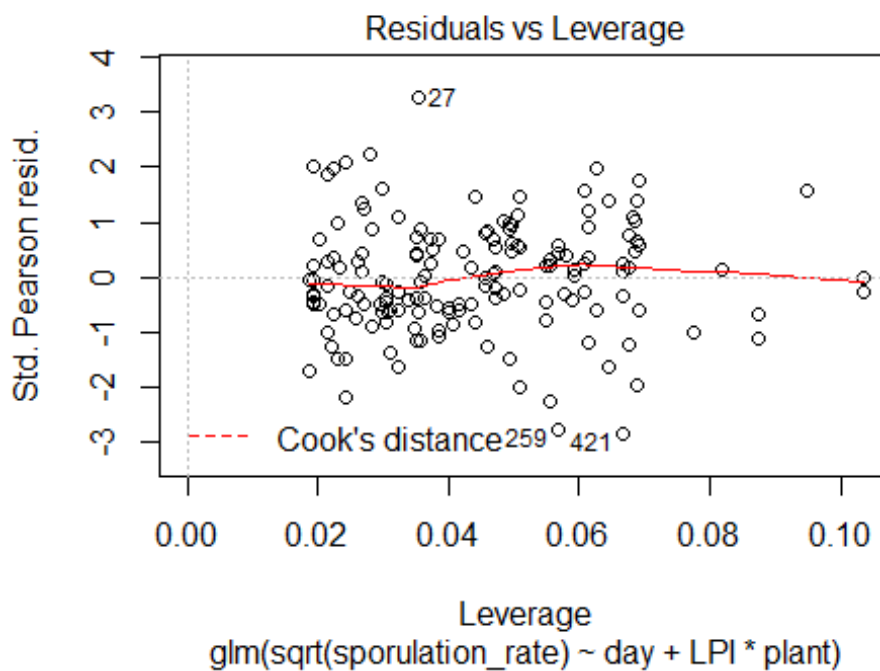

```
summary(glmrate) # Sign : Intercept, LPI, day
##
## Call:
## glm(formula = sqrt(sporulation_rate) ~ day + LPI * plant, family = gaussian,
##      data = results)
```

```
##
## Deviance Residuals:
##      Min        1Q      Median        3Q        Max
## -10.6398   -2.2896    0.0128    2.3649   12.4697
##
## Coefficients:
##              Estimate Std. Error t value Pr(>|t|)
## (Intercept)  16.3902    1.7623   9.301 < 2e-16 ***
## day          -0.6538    0.2796  -2.339 0.020653 *
## LPI           0.4390    0.1155   3.800 0.000209 ***
## plantpl2     -5.2921    2.4616  -2.150 0.033144 *
## plantpl3     -0.2790    2.1888  -0.127 0.898732
## LPI:plantpl2  0.2595    0.1690   1.535 0.126798
## LPI:plantpl3  0.1760    0.1587   1.109 0.269095
## ---
## Signif. codes:  0 '***' 0.001 '**' 0.01 '*' 0.05 '.' 0.1 ' ' 1
##
## (Dispersion parameter for gaussian family taken to be 15.12695)
##
##      Null deviance: 3778.7  on 158  degrees of freedom
## Residual deviance: 2299.3  on 152  degrees of freedom
## (417 observations deleted due to missingness)
## AIC: 891.98
##
## Number of Fisher Scoring iterations: 2

aov.rate <- anova(glmrate, test="Chisq")
kable(aov.rate) # LPI***, plant***, day*
```

|           | Df | Deviance  | Resid. Df | Resid. Dev | Pr(>Chi)  |
|-----------|----|-----------|-----------|------------|-----------|
| NULL      | NA | NA        | 158       | 3778.730   | NA        |
| day       | 1  | 87.98223  | 157       | 3690.748   | 0.0158787 |
| LPI       | 1  | 992.56956 | 156       | 2698.178   | 0.0000000 |
| plant     | 2  | 360.81320 | 154       | 2337.365   | 0.0000066 |
| LPI:plant | 2  | 38.06786  | 152       | 2299.297   | 0.2841426 |

```
Tukey_LPI <- HSD.test(glmrate, "LPI", group=TRUE, main="Sporulation rate for each LPI")
Tukey_plant <- HSD.test(glmrate, "plant", group=TRUE, main="Sporulation rate for each plant")
Tukey_day <- HSD.test(glmrate, "day", group=TRUE, main="Sporulation rate for each day")
kable(Tukey_LPI$groups)
```

|    | sqrt(sporulation_rate) | groups |
|----|------------------------|--------|
| 20 | 24.06006               | a      |

|    |          |     |
|----|----------|-----|
| 18 | 23.60081 | ab  |
| 16 | 23.28814 | ab  |
| 14 | 21.12870 | abc |
| 12 | 19.95987 | bc  |
| 8  | 17.99068 | c   |
| 10 | 17.96135 | c   |
| 6  | 17.67110 | c   |

```
kable(Tukey_plant$groups)
```

|     | sqrt(sporulation_rate) | groups |
|-----|------------------------|--------|
| pl3 | 22.21492               | a      |
| pl1 | 20.69748               | ab     |
| pl2 | 19.39211               | b      |

```
kable(Tukey_day$groups)
```

|  | sqrt(sporulation_rate) | groups |
|--|------------------------|--------|
|  | 22.04345               | a      |
|  | 20.77353               | a      |
|  | 20.18230               | a      |
|  | 20.12319               | a      |

LPI and plant have significant effects on sporulation rate.

Experimental data effect on sporulation capacity

```
# Distribution
```

```
hist(results$sporulation_capacity, col='blue')
```

## Histogram of results\$sporulation\_capacity

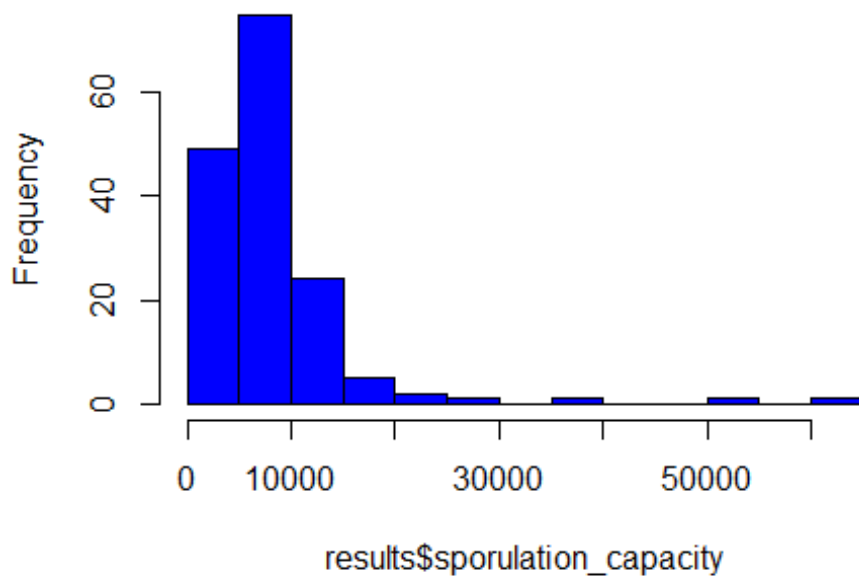

```
# Sporulation capacity per LPI
graphe=with(resna,bargraph.CI(x.factor=LPI,response=sporulation_capacity,fun=mean,xlab="LPI",ylab="Sporulation capacity (urediniospore/μm2/day)",main="Sporulation capacity for each leaf maturity", ylim=c(0,20000), col=cc, xpd=T,legend = T, lc=T,uc=T, ci.fun= function(x) c(mean(x)-se(x), mean(x) + se(x))))
text(graphe$xvals,graphe$vals+5000,c("a","b","c","f","d","e","h","g")) # add Tukey coefficients
```

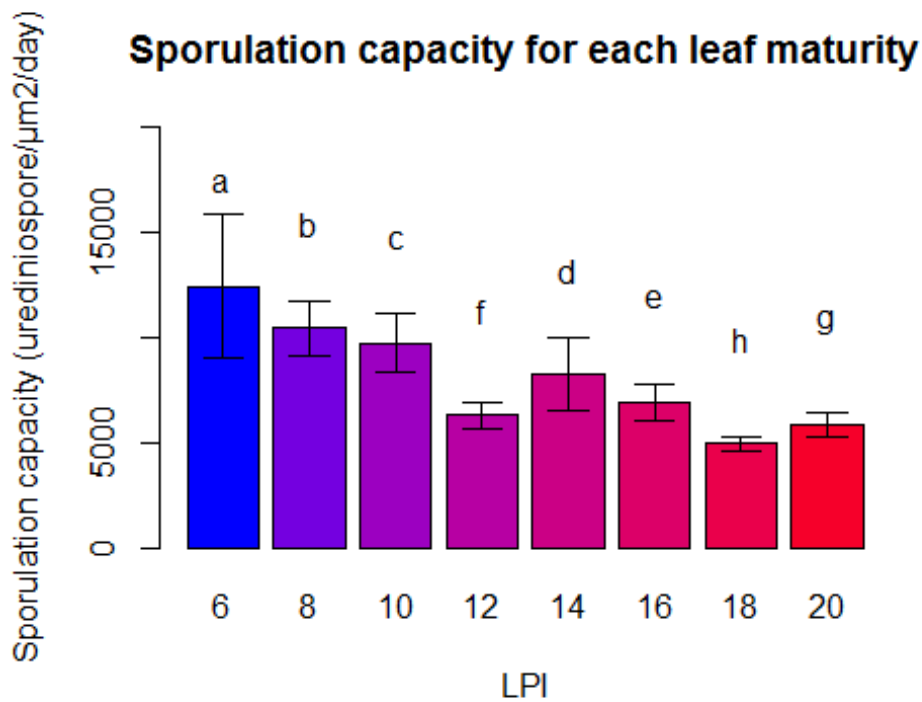

```
# Sporulation capacity per plant
graphe=with(resna,bargraph.CI(x.factor=plant,response=sporulation_capacity,
fun=mean,xlab="Plant",ylab="Sporulation capacity (urediniospore/μm²/day)",m
ain="Sporulation capacity for each plant",ylim=c(0,15000),col='grey',xpd=T,
legend = T, lc=T,uc=T, ci.fun= function(x) c(mean(x)-se(x), mean(x) + se(x)
)))
```

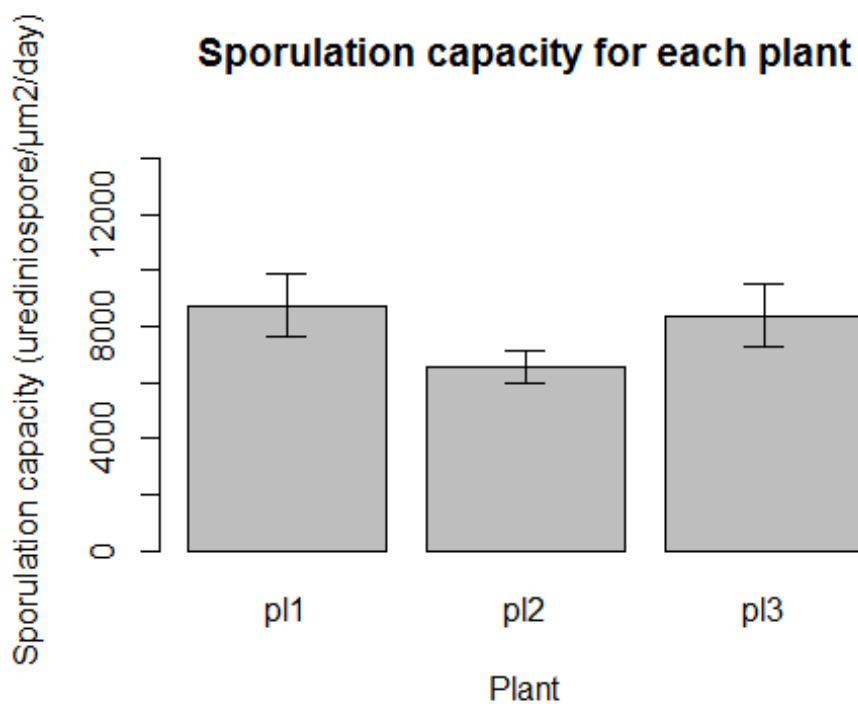



```
# Sporulation capacity per inoculation day
graphe=with(resna,bargraph.CI(x.factor=day,response=sporulation_capacity,fun=mean,xlab="Day",ylab="Sporulation capacity (urediniospore/μm2/day)",main="Sporulation capacity for each inoculation day",ylim=c(0,15000),col='grey',xpd=T,legend = T, lc=T,uc=T, ci.fun= function(x) c(mean(x)-se(x), mean(x) + se(x))))
```

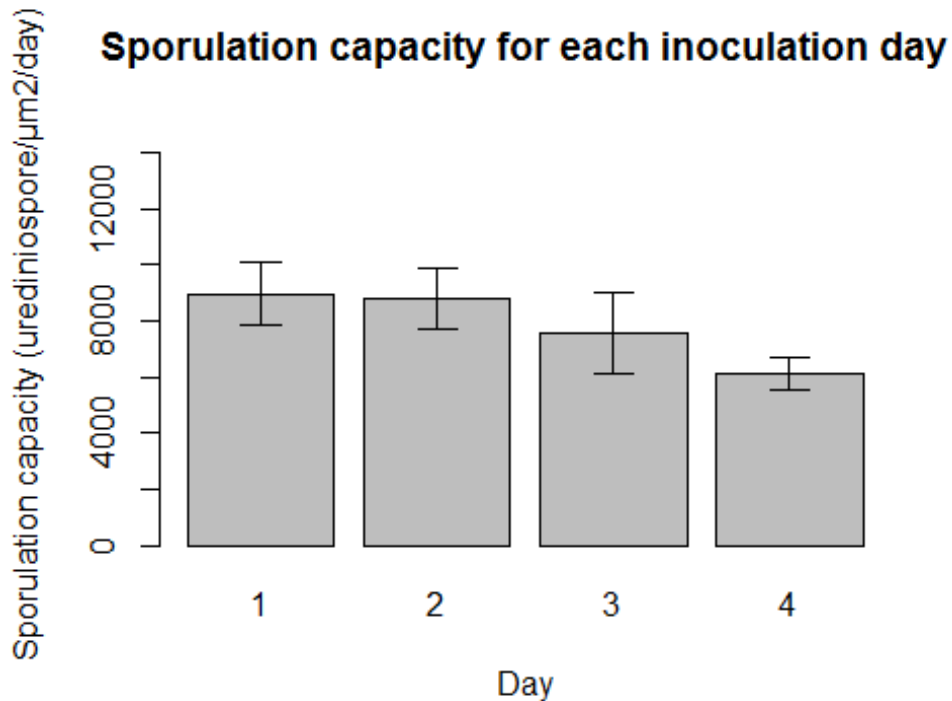

GLM

```
glmcapa = glm(sporulation_capacity ~ day+LPI*plant, results, family = Gamma(link= inverse))
plot(glmcapa, ask=F)
```

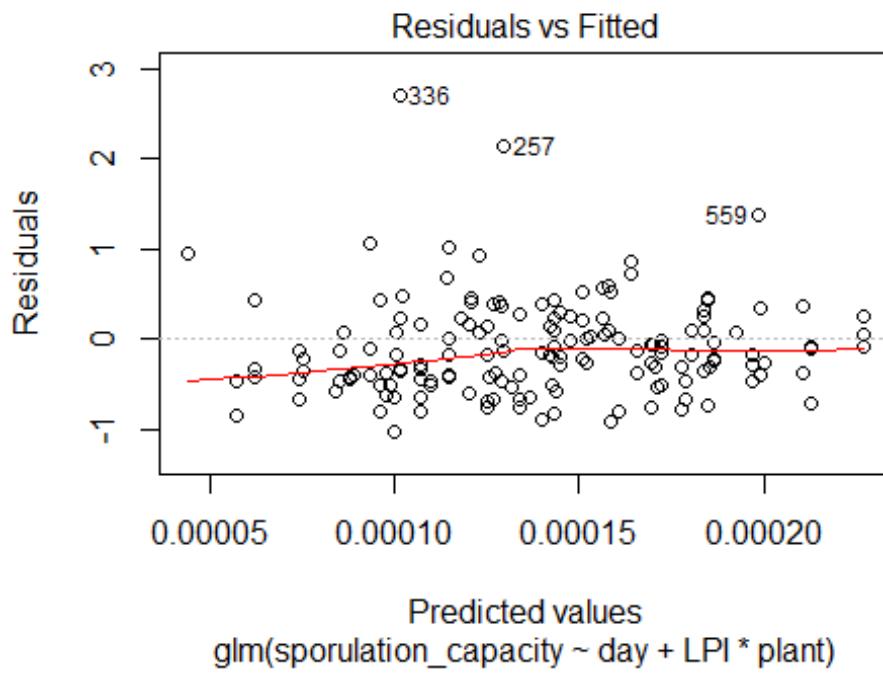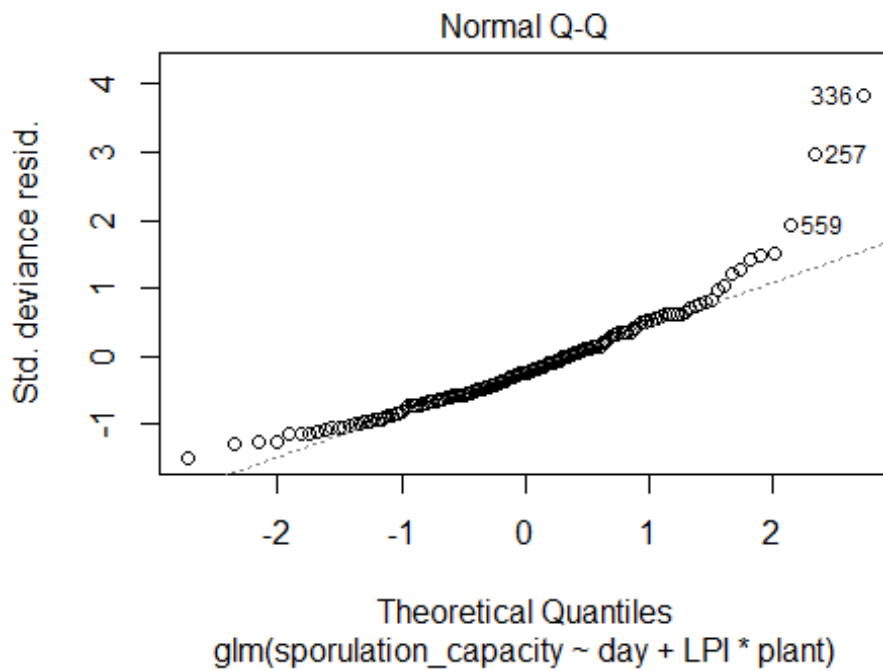

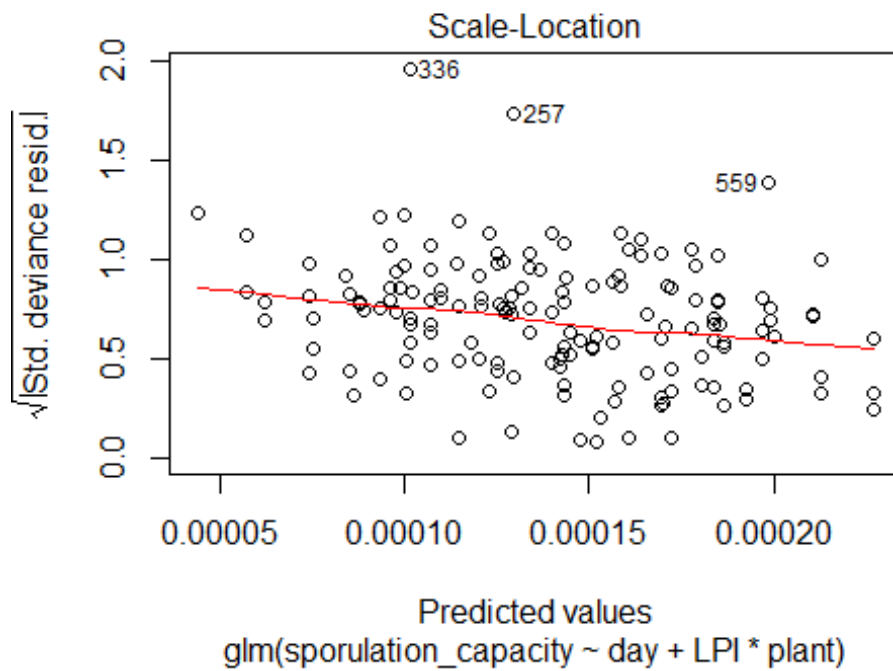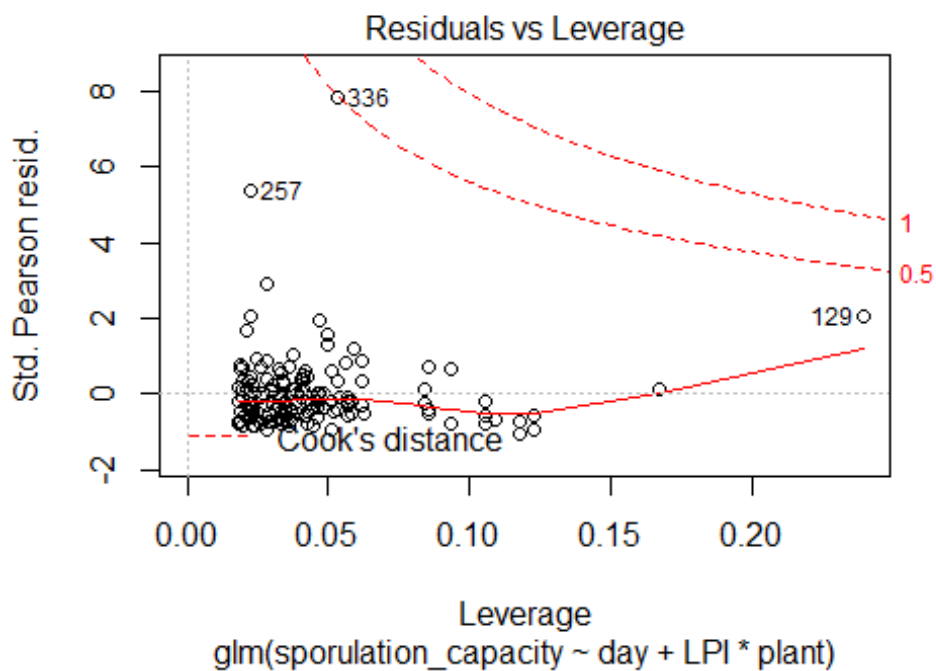

```
summary(glmcapa) # Sign : Intercept, LPI, day
##
## Call:
## glm(formula = sporulation_capacity ~ day + LPI * plant, family = Gamma(link = inverse),
##      data = results)
```

```
##
## Deviance Residuals:
##   Min       1Q   Median       3Q      Max
## -1.0213  -0.4491  -0.1678   0.1673   2.7031
##
## Coefficients:
##              Estimate Std. Error t value Pr(>|t|)
## (Intercept) -2.390e-05  2.899e-05  -0.825  0.410944
## day          1.350e-05  6.531e-06   2.067  0.040464 *
## LPI          9.026e-06  2.524e-06   3.576  0.000469 ***
## plantpl2     5.364e-05  5.026e-05   1.067  0.287589
## plantpl3     5.208e-05  3.987e-05   1.306  0.193420
## LPI:plantpl2 -1.864e-06  4.152e-06  -0.449  0.654047
## LPI:plantpl3 -3.580e-06  3.573e-06  -1.002  0.318040
## ---
## Signif. codes:  0 '***' 0.001 '**' 0.01 '*' 0.05 '.' 0.1 ' ' 1
##
## (Dispersion parameter for Gamma family taken to be 0.5271046)
##
##   Null deviance: 63.521  on 158  degrees of freedom
## Residual deviance: 46.222  on 152  degrees of freedom
## (417 observations deleted due to missingness)
## AIC: 3070.7
##
## Number of Fisher Scoring iterations: 7

aov.capa <- anova(glmcapa, test="Chisq")
kable(aov.capa) # LPI***
```

|           | Df | Deviance   | Resid. Df | Resid. Dev | Pr(>Chi)  |
|-----------|----|------------|-----------|------------|-----------|
| NULL      | NA | NA         | 158       | 63.52131   | NA        |
| day       | 1  | 2.7419613  | 157       | 60.77935   | 0.0225618 |
| LPI       | 1  | 12.1986333 | 156       | 48.58071   | 0.0000015 |
| plant     | 2  | 1.8302893  | 154       | 46.75043   | 0.1761935 |
| LPI:plant | 2  | 0.5286968  | 152       | 46.22173   | 0.6056153 |

```
Tukey_LPI <- HSD.test(glmcapa, "LPI", group=TRUE, main="Sporulation capacity f
or each LPI")
kable(Tukey_LPI$groups)
```

|    | sporulation_capacity | groups |
|----|----------------------|--------|
| 6  | 12423.577            | a      |
| 8  | 10445.532            | b      |
| 10 | 9525.264             | c      |
| 14 | 8255.382             | d      |

|    |          |   |
|----|----------|---|
| 16 | 6888.095 | e |
| 12 | 6300.009 | f |
| 20 | 5808.520 | g |
| 18 | 4933.928 | h |

LPI has significant effects on sporulation capacity.

Experimental data effect on mycelium quantity

```
# Distribution
hist(results$mycelium_quantity, col='blue')
```

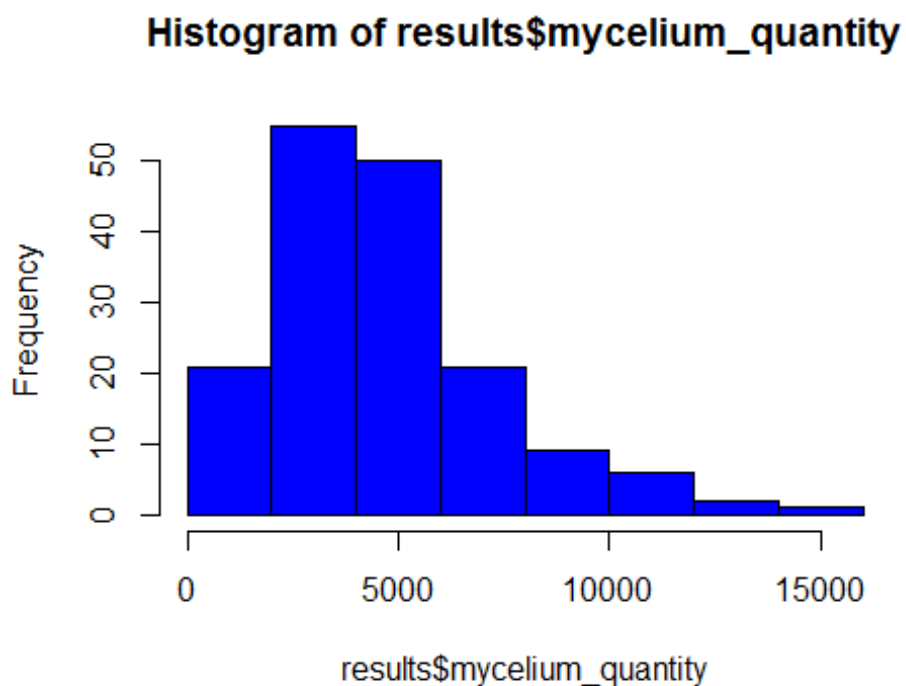

```
# Mycelium quantity per LPI
graphe=with(resna,bargraph.CI(x.factor=LPI,response=mycelium_quantity,fun=mean,xlab="LPI",ylab="Mycelium quantity (arbitrary unit)",main="Mycelium quantity for each leaf maturity",col=cc, xpd=T,legend = T, lc=T,uc=T, ci.fun=function(x) c(mean(x)-se(x), mean(x) + se(x))))
```

### Mycelium quantity for each leaf maturity

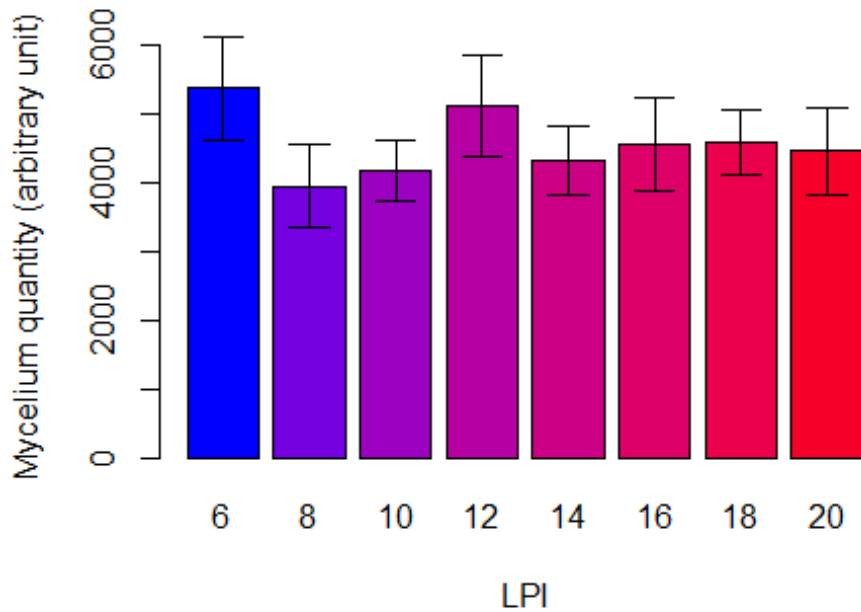

*# Mycelium quantity per plant*

```
graphe=with(resna,bargraph.CI(x.factor=plant,response=mycelium_quantity,fun  
=mean,xlab="Plant",ylab="Mycelium quantity (arbitrary unit)",main="Mycelium  
quantity for each plant",col='grey', xpd=T,legend = T, lc=T,uc=T, ci.fun= f  
unction(x) c(mean(x)-se(x), mean(x) + se(x))))
```

### Mycelium quantity for each plant

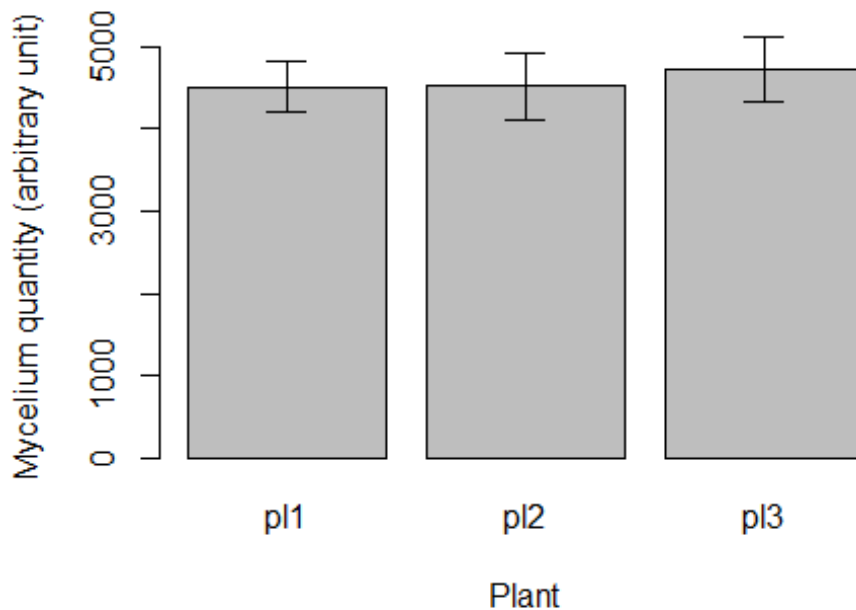

```
# Mycelium quantity per inoculation day
graphe=with(resna,bargraph.CI(x.factor=day,response=mycelium_quantity,fun=mean,xlab="Day",ylab="Mycelium quantity (arbitrary unit)",main="Mycelium quantity for each inoculation day",ylim=c(0,6500),col='grey',xpd=T,legend = T,lc=T,uc=T, ci.fun= function(x) c(mean(x)-se(x), mean(x) + se(x))))
```

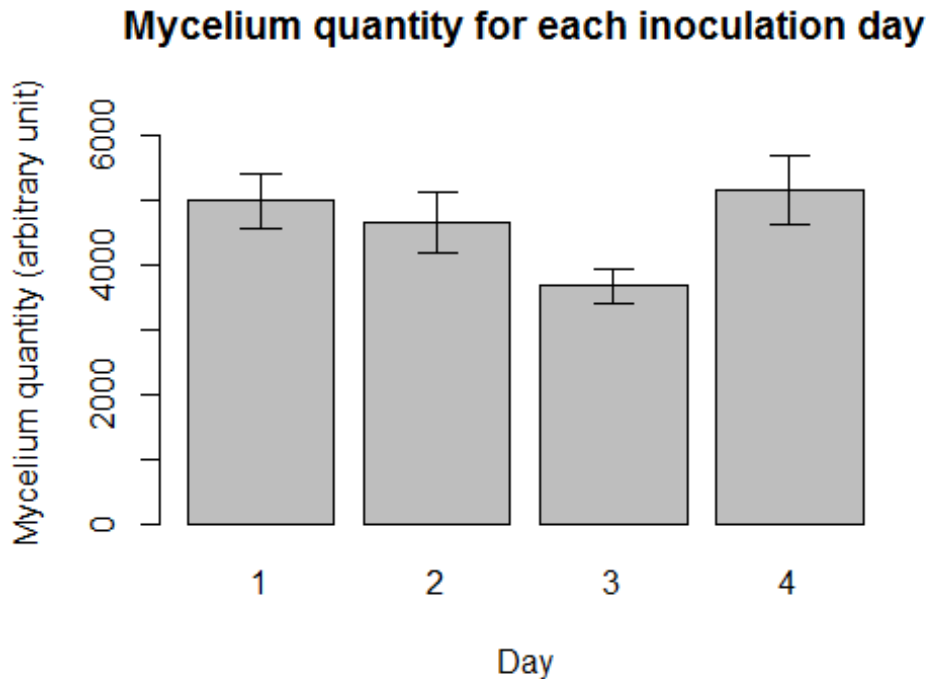

GLM

```
glmmyc <- glm(sqrt(mycelium_quantity) ~ day+LPI*plant, results, family = gaussian)
plot(glmmyc, ask=F)
```

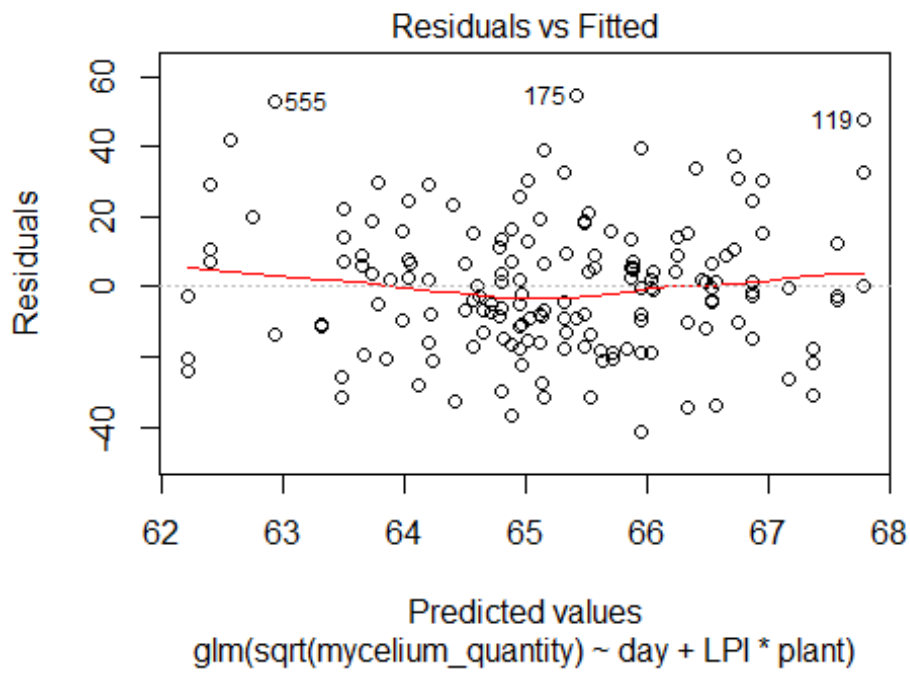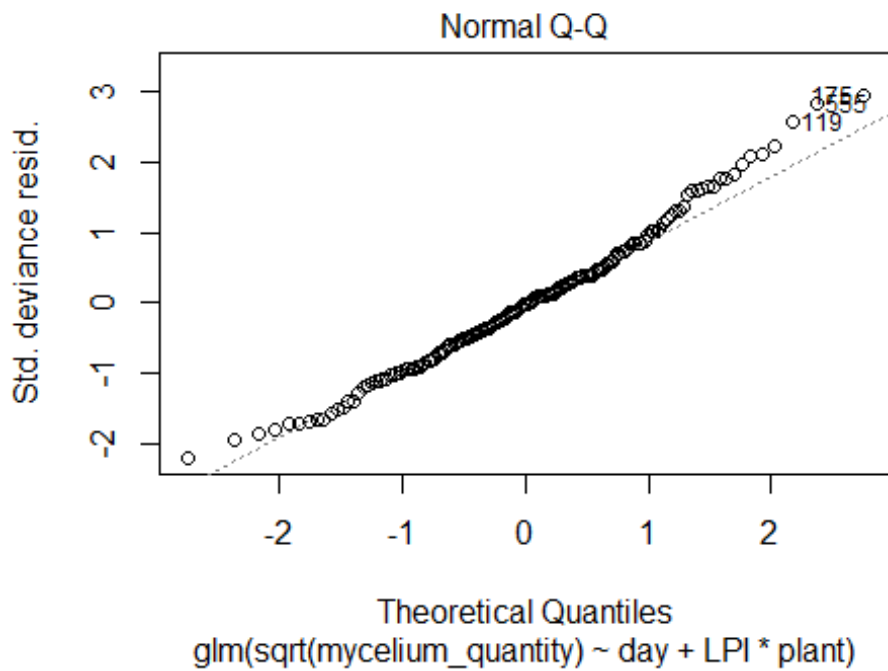



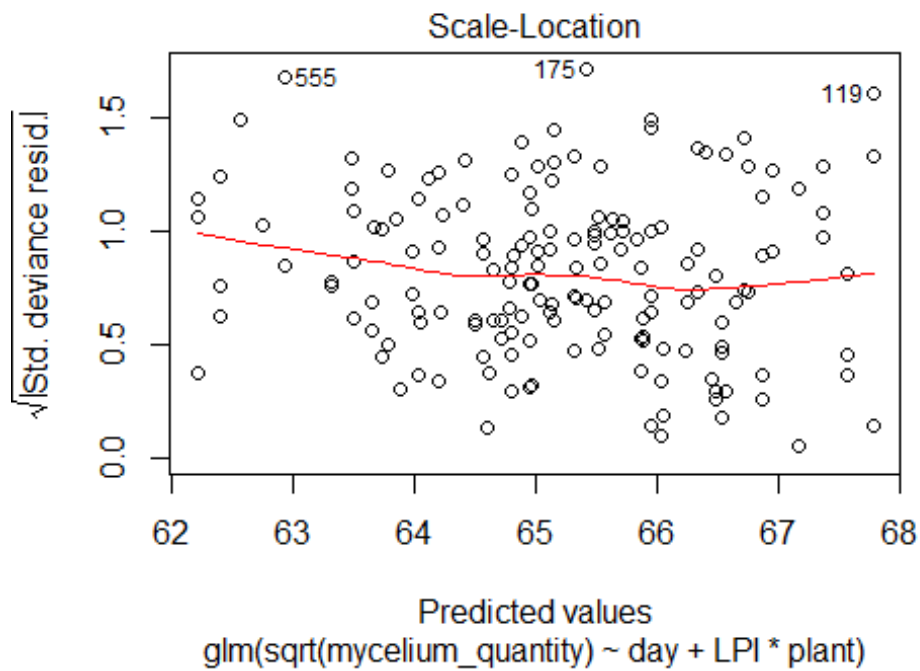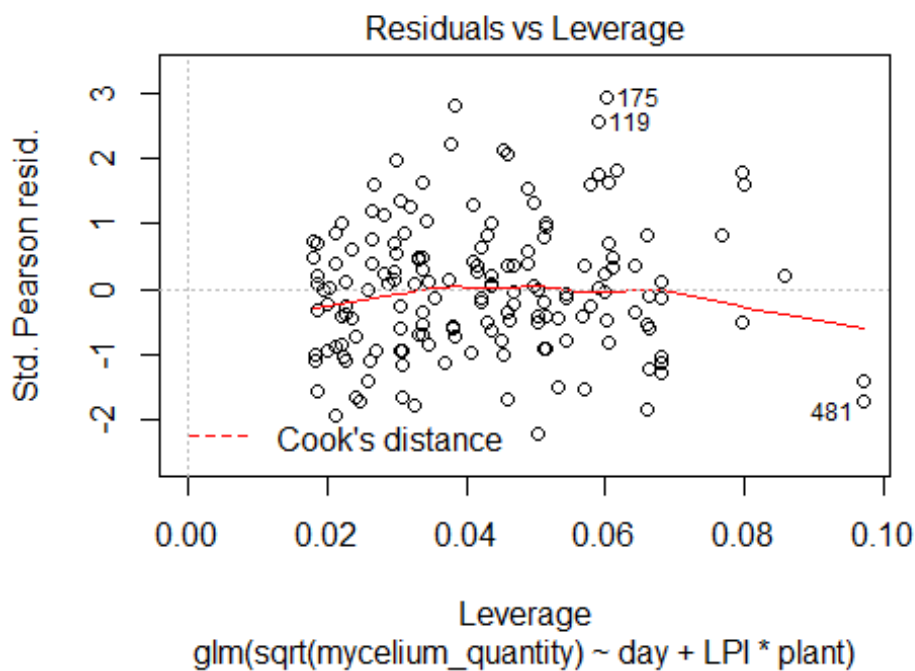

```
summary(glmmyc) # Sign: day
##
## Call:
## glm(formula = sqrt(mycelium_quantity) ~ day + LPI * plant, family = gaussian,
## data = results)
```

```
##
## Deviance Residuals:
##   Min       1Q   Median       3Q      Max
## -41.183  -13.137   -0.362   10.414   54.538
##
## Coefficients:
##              Estimate Std. Error t value Pr(>|t|)
## (Intercept)  68.09934    8.60147   7.917 4.03e-13 ***
## day          -0.91860    1.34491  -0.683   0.496
## LPI          -0.03875    0.55413  -0.070   0.944
## plantpl2    -0.39421   11.80883  -0.033   0.973
## plantpl3     1.21987   10.64487   0.115   0.909
## LPI:plantpl2 -0.05226    0.81174  -0.064   0.949
## LPI:plantpl3 -0.06455    0.76410  -0.084   0.933
## ---
## Signif. codes:  0 '***' 0.001 '**' 0.01 '*' 0.05 '.' 0.1 ' ' 1
##
## (Dispersion parameter for gaussian family taken to be 366.9218)
##
##   Null deviance: 58238  on 164  degrees of freedom
## Residual deviance: 57974  on 158  degrees of freedom
## (411 observations deleted due to missingness)
## AIC: 1451.4
##
## Number of Fisher Scoring iterations: 2

aov.myc <- anova(glmmyc, test="Chisq")
kable(aov.myc) # Sign: none
```

|           | Df | Deviance   | Resid. Df | Resid. Dev | Pr(>Chi)  |
|-----------|----|------------|-----------|------------|-----------|
| NULL      | NA | NA         | 164       | 58238.35   | NA        |
| day       | 1  | 169.736862 | 163       | 58068.61   | 0.4964128 |
| LPI       | 1  | 30.506287  | 162       | 58038.11   | 0.7730850 |
| plant     | 2  | 61.593745  | 160       | 57976.51   | 0.9194928 |
| LPI:plant | 2  | 2.868327   | 158       | 57973.65   | 0.9960990 |

No effect of environmental factors on in planta mycelium quantity.

## Summary of anova coefficients

```
aov.table <- matrix(nrow = 7, ncol=4, 'NA')
rownames(aov.table) <- c('Infection efficiency', 'Latent period', 'Uredinia size', 'Spore volume', 'Sporulation rate', 'Sporulation capacity', 'Mycelium quantity')
colnames(aov.table) <- c('LPI', 'Plant', 'LPI:Plant', 'day')
```

```

aov.table['Infection efficiency',1:4] <- round(aov.eff[c('LPI','plant', 'LPI:plant', 'day'), 'Pr(>Chi)'], 3)
aov.table['Latent period',1:4] <- round(aov.lat[c('LPI','plant', 'LPI:plant', 'day'), 'Pr(>Chi)'], 3)
aov.table['Uredinia size',1:4] <- round(aov.us[c('LPI','plant', 'LPI:plant', 'day'), 'Pr(>Chi)'], 3)
aov.table['Spore volume',1:4] <- round(aov.vol[c('LPI','plant', 'LPI:plant', 'day'), 'Pr(>Chi)'], 3)
aov.table['Sporulation rate',1:4] <- round(aov.rate[c('LPI','plant', 'LPI:plant', 'day'), 'Pr(>Chi)'], 3)
aov.table['Sporulation capacity',1:4] <- round(aov.capa[c('LPI','plant', 'LPI:plant', 'day'), 'Pr(>Chi)'], 3)
aov.table['Mycelium quantity',1:4] <- round(aov.myc[c('LPI','plant', 'LPI:plant', 'day'), 'Pr(>Chi)'], 3)

```

```
kable(aov.table)
```

|                      | LPI   | Plant | LPI:Plant | day   |
|----------------------|-------|-------|-----------|-------|
| Infection efficiency | 0.246 | 0.416 | 0.136     | 0.05  |
| Latent period        | 0.578 | 0.053 | 0.535     | 0.425 |
| Uredinia size        | 0     | 0.023 | 0.229     | 0.136 |
| Spore volume         | 0.945 | 0.155 | 0.617     | 0.555 |
| Sporulation rate     | 0     | 0     | 0.284     | 0.016 |
| Sporulation capacity | 0     | 0.176 | 0.606     | 0.023 |
| Mycelium quantity    | 0.773 | 0.919 | 0.996     | 0.496 |

```
# FDR correction for multiple tests
```

```

aov.adj <- p.adjust(aov.table, method='fdr')
aov.adj.table <- matrix(data = aov.adj, nrow = 7, ncol = 4)

```

```

colnames(aov.adj.table) <- colnames(aov.table)
rownames(aov.adj.table) <- rownames(aov.table)
kable(round(aov.adj.table, 3))

```

|                      | LPI   | Plant | LPI:Plant | day   |
|----------------------|-------|-------|-----------|-------|
| Infection efficiency | 0.459 | 0.661 | 0.346     | 0.165 |
| Latent period        | 0.720 | 0.165 | 0.720     | 0.661 |
| Uredinia size        | 0.000 | 0.092 | 0.458     | 0.346 |
| Spore volume         | 0.980 | 0.362 | 0.720     | 0.720 |
| Sporulation rate     | 0.000 | 0.000 | 0.497     | 0.090 |
| Sporulation capacity | 0.000 | 0.379 | 0.720     | 0.092 |
| Mycelium quantity    | 0.866 | 0.980 | 0.996     | 0.720 |

## Leaf characteristics data exploration: PCA

Describe the raw leaf characteristics

```
# Dataset
leaf <- merge(sugar, phenol, by='leaf_id')
leaf <- merge(leaf, phenolics, by='leaf_id')
leaf <- merge(leaf, CN, by='leaf_id')
leaf$total_phenolics <- leaf$polyphenols
leaf$LPI <- leaf$LPI.x
leaf$plant <- leaf$plant.x

#PCA

# pca <- dudi.pca(leaf[,c('Chlorogenic_acid', 'PA_dimer', 'Salicine', 'Caffeoyl
L_glucose_isomer1', 'Catechin', 'Coumaroyl_glucose_isomer1', 'Caffeoyl_glucose
_isomer2', 'Coumaroyl_glucose_isomer2', 'Caffeoyl_shikimate', 'Salicortin', 'Ru
tin', 'AcetylSalicortin', 'Quercitrin', 'Homaloside_D', 'Putative_populoside',
Tremulacin', 'sucrose', 'glucose', 'fructose', 'C', 'N')], center=T, scale=T,
nf=3, scannf=FALSE)
# OR
pca <- dudi.pca(leaf[,c('salicinoid', 'flavonol', 'hydroxycinnamic_acid_est
ers', 'flavan3ol', 'total_phenolics', 'sucrose', 'glucose', 'fructose', 'C', 'N'
)], center=T, scale=T, nf=3, scannf=FALSE)
sup <- supcol(pca, scalewt(leaf[c('LPI', 'plant')]))$cosup
p <- fviz_pca_var(pca,
  col.var = "contrib", # Color by contributions to the PC
  gradient.cols = c("#00AFBB", "#FC4E07"),
  repel = TRUE) # Avoid text overlapping
# Add experimental (LPI, plant and day) data as supplementary variables
fviz_add(p, sup, geom="arrow", linetype='solid', color ="black")
```

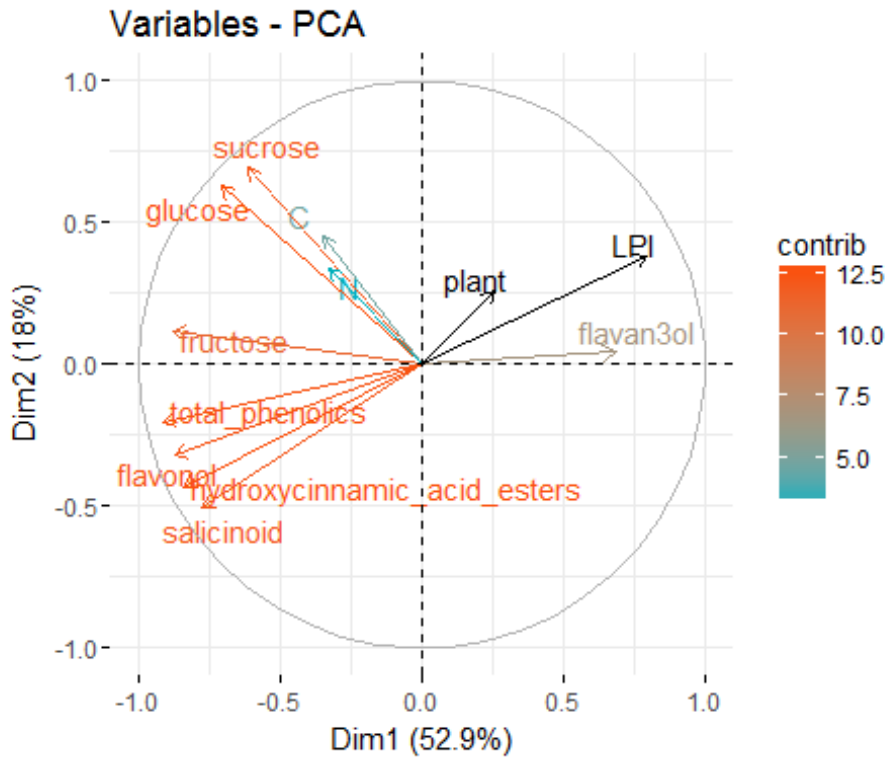

```
# color scale for LPI representation on 1st and 2nd axis
cc <- scales::seq_gradient_pal("blue", "red", "Lab")(seq(0,1,length.out=8))
s.class(dfxy = pca$li, fac = as.factor(leaf$LPI), col = cc, clabel = 0.9, gr
id= 0, xax = 1, yax = 2, add.plot= F, cellipse = F)
```

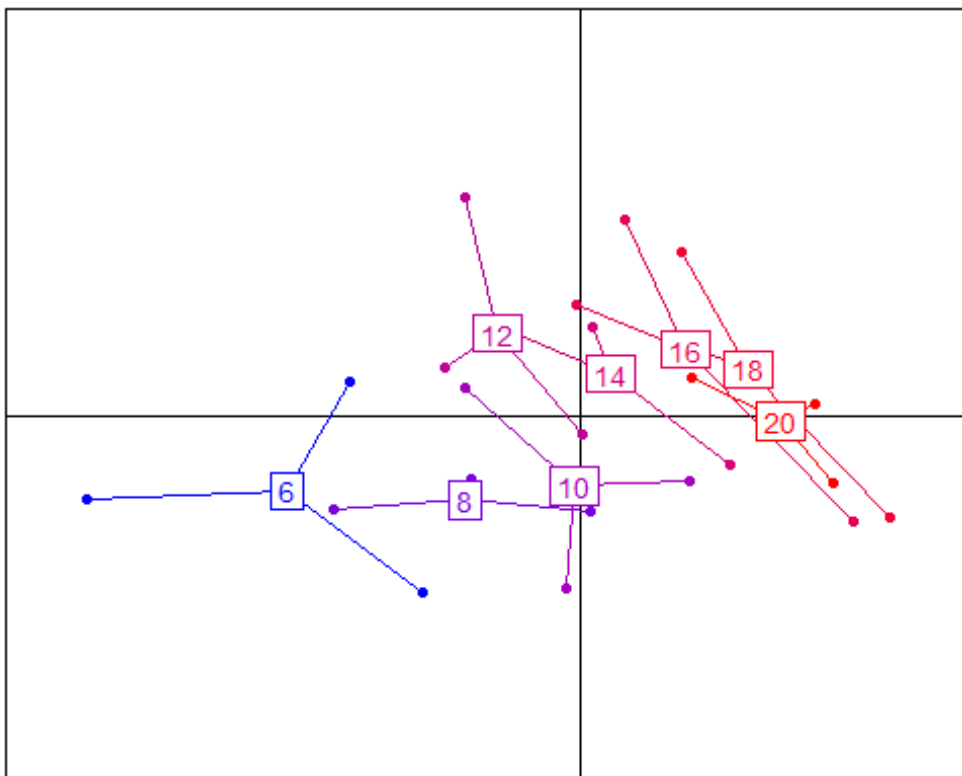

```
# PCA representation of 1st and 3rd axis
fviz_pca_var(pca, axes = c(2, 3),
             col.var = "contrib", # Color by contributions to the PC
             gradient.cols = c("#00AFBB", "#FC4E07"),
             repel = TRUE) # Avoid text overlapping)
```

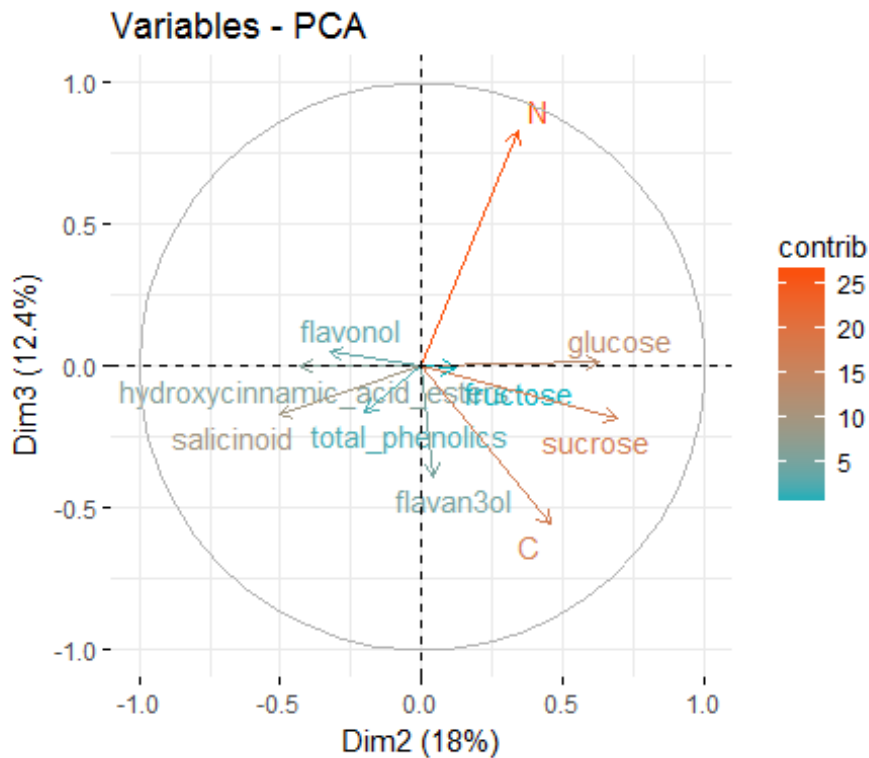

```
# PCA variances explained on the 3 first axis
pca.var <- data.frame(pca$co)
kable(pca.var)
```

|                             | Comp1      | Comp2     | Comp3      |
|-----------------------------|------------|-----------|------------|
| salicinoid                  | -0.7762155 | -         | -0.1709359 |
|                             |            | 0.5066011 |            |
| flavonol                    | -0.8752044 | -         | 0.0513348  |
|                             |            | 0.3217504 |            |
| hydroxycinnamic_acid_esters | -0.8427070 | -         | 0.0006166  |
|                             |            | 0.4295869 |            |
| flavan3ol                   | 0.6857073  | 0.0424990 | -0.3891061 |
| total_phenolics             | -0.9172491 | -         | -0.1639736 |
|                             |            | 0.2029745 |            |
| sucrose                     | -0.6179250 | 0.6931257 | -0.1816724 |
| glucose                     | -0.7108893 | 0.6289603 | 0.0154362  |
| fructose                    | -0.8805084 | 0.1174024 | -0.0073086 |

|   |            |           |            |
|---|------------|-----------|------------|
| C | -0.3524496 | 0.4545417 | -0.5561184 |
| N | -0.3311749 | 0.3417146 | 0.8290247  |

PC1 is related to all phenolic compounds and explains most 53% of the total inertia. Sugars variation is not depending on LPI.

LPI can be well discriminated according to their site content (especially through total phenolics and 3 phenolic subclasses, flavonols, salicinoids and hydroxycinnamic acid esters).

### Heatmap

```
leaf_hm <- as.matrix(leaf[,c('sucrose', 'glucose', 'fructose', 'total_phenolics', 'C', 'N')])
leaf_hm <- as.matrix(leaf[,c('sucrose', 'glucose', 'fructose', 'Chlorogenic_acid', 'PA_dimer', 'Salicine', 'Caffeoyl_glucose_isomer1', 'Catechin', 'Coumaroyl_glucose_isomer1', 'Caffeoyl_glucose_isomer2', 'Coumaroyl_glucose_isomer2', 'Caffeoyl_shikimate', 'Salicortin', 'Rutin', 'AcetylSalicortin', 'Quercitrin', 'Homaloside_D', 'Putative_populoside', 'Tremulacin', 'C', 'N')])
rownames(leaf_hm) <- leaf$leaf_id
hm <- heatmap(leaf_hm, xlab="Leaf characteristics", ylab = "LPI", scale='col', col=cc)
```

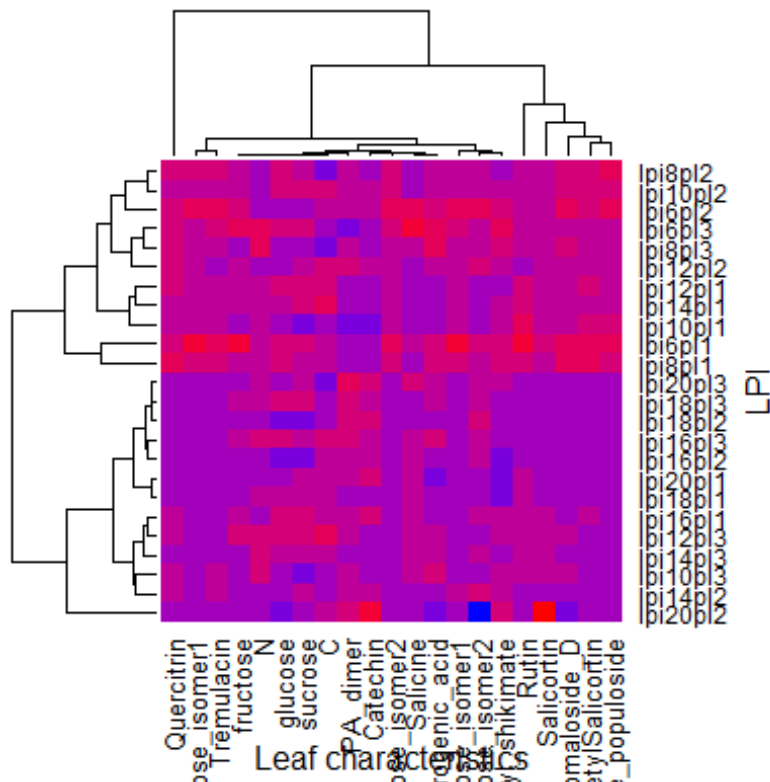

## Test for leaf data: on 24 observations (3 plants x 8 LPI)

Test the correlation between leaf data and fungal data. On aggregated fungal data per LPI and plant to fit to the leaf data's scale.

```
# Aggregate fungal data
resag <- aggregate(results[c('infection_efficiency','latent_period', 'uredinia_size', 'spore_volume', 'sporulation_rate', 'sporulation_capacity', 'mycelium_quantity', 'sucrose', 'glucose', 'fructose', 'C', 'N', 'total_phenolics', 'salicinoid', 'flavanol', 'hydroxycinnamic_acid_esters', 'flavan3ol')], results[c('leaf_id')], function(a) c(mean(a, na.rm=T)))

# Correlation matrix (on ordered variables)
#resag0 <- resag[,c('leaf_id', 'C', 'N', 'sucrose', 'glucose', 'fructose', 'salicin', 'total_phenolics', 'mycelium_quantity', 'uredinia_size', 'sporulation_rate', 'sporulation_capacity', 'spore_volume', 'infection_efficiency', 'latent_period')]
#mat <- rcorr(as.matrix(resag0[,2:ncol(resag0)]), type="spearman") # Spearman test because nonparametric variables
mat <- rcorr(as.matrix(resag[,2:ncol(resag)]), type="spearman") # Spearman test because nonparametric variables
corrplot(mat$r, p.mat=mat$p, sig.level =1.5e-03, insig = "label_sig", pch.col = 'black', type='upper', order='original', tl.col='black', tl.srt=45, diag=F, title='Plot of Spearman correlation coefficients') # order = 'hclust' ie for the hierarchical clustering order OR 'original' ie as in the table
```

**Plot of Spearman correlation coefficients**

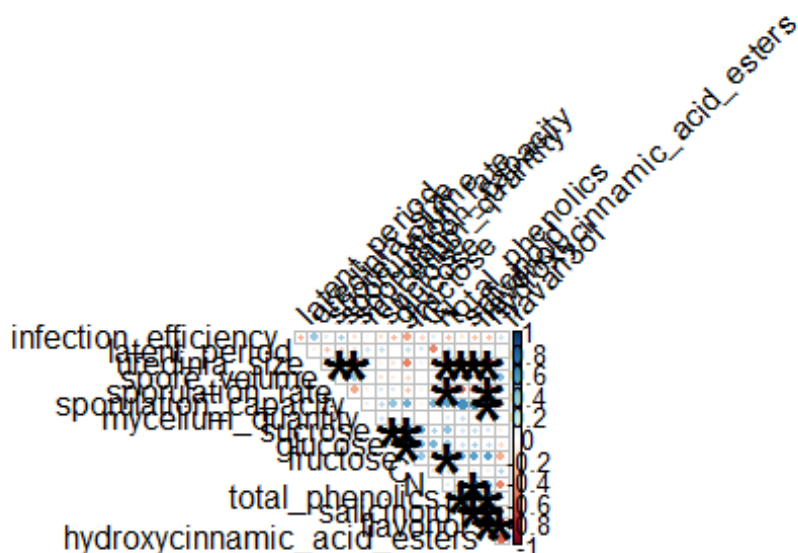



blue = positive correlations  
red = negative correlations  
dot size = absolute value

```
# Correction of Pvalues for multiple tests : False Discovery Rate: to fix s
ig.level in corrplot
# flatten matrices of correlation coefficients and Pvalues
flattenCorrMatrix <- function(cormat, pmat) {
  ut <- upper.tri(cormat)
  data.frame(
    row = rownames(cormat)[row(cormat)[ut]],
    column = rownames(cormat)[col(cormat)[ut]],
    cor = (cormat)[ut],
    p = pmat[ut]
  )
}
flatmat <- flattenCorrMatrix(cormat=mat$r, pmat=mat$P)
print(flatmat[1:5,])

##           row      column      cor      p
## 1 infection_efficiency latent_period -0.34411128 0.09965466
## 2 infection_efficiency uredinia_size  0.37673367 0.06958357
## 3      latent_period uredinia_size -0.07091583 0.74194120
## 4 infection_efficiency spore_volume  0.13943168 0.51582531
## 5      latent_period spore_volume -0.28061785 0.18410347

# Calculate the adjusted Pvalues
flatmat$adjusted <- p.adjust(flatmat$p, method='fdr', n=length(flatmat$p))
# Display significant correlations
flatmat[which(flatmat$adjusted < 0.01),]

##           row      column      cor
## 9      uredinia_size sporulation_rate  0.8686957
## 13     uredinia_size sporulation_capacity -0.7330435
## 36           sucrose      glucose  0.8469565
## 44           sucrose      fructose  0.7765217
## 45           glucose      fructose  0.8200000
## 69     uredinia_size total_phenolics -0.7666884
## 71     sporulation_rate total_phenolics -0.6140465
## 76           fructose total_phenolics  0.6997173
## 81     uredinia_size salicinoid -0.7252174
## 91     total_phenolics salicinoid  0.7184171
## 94     uredinia_size flavonol -0.6713043
## 103            N      flavonol  0.6504348
## 105     salicinoid      flavonol  0.7626087
## 108     uredinia_size hydroxycinnamic_acid_esters -0.8260870
## 110    sporulation_rate hydroxycinnamic_acid_esters -0.6834783
## 111 sporulation_capacity hydroxycinnamic_acid_esters  0.6843478
```

```

## 118      total_phenolics hydroxycinnamic_acid_esters  0.6966732
## 119          salicinoid hydroxycinnamic_acid_esters  0.8139130
## 120             flavonol hydroxycinnamic_acid_esters  0.8791304
## 135             flavonol                               flavan3ol -0.7834783
##
##          p      adjusted
## 9  3.708598e-08 2.521847e-06
## 13 4.612599e-05 5.702849e-04
## 36 1.799033e-07 8.155616e-06
## 44 8.151910e-06 1.385825e-04
## 45 9.382600e-07 2.552067e-05
## 69 1.245372e-05 1.881896e-04
## 71 1.413677e-03 9.613006e-03
## 76 1.414401e-04 1.373990e-03
## 81 6.086815e-05 6.898390e-04
## 91 7.688471e-05 8.043324e-04
## 94 3.290656e-04 2.486273e-03
## 103 5.793123e-04 4.146656e-03
## 105 1.476022e-05 2.007390e-04
## 108 6.623409e-07 2.251959e-05
## 110 2.317540e-04 1.854032e-03
## 111 2.258819e-04 1.854032e-03
## 118 1.555306e-04 1.410144e-03
## 119 1.312388e-06 2.974747e-05
## 120 1.568836e-08 2.133617e-06
## 135 5.962930e-06 1.158512e-04

```

Adjusted P-values on Spearman correlation coefficients highlight significant correlation between :

- all sugars,
- salicin and total\_phenolics (precursor of and defense components respectively),
- fructose and total\_phenolics,
- total\_phenolics and uredinai size,
- total\_phenolics and sporulation rate,
- total\_phenolics and sporulation capacity,
- uredinia size and sporulation rate,
- uredinia size and sporulation capacity.

Biplots on correlated data

```

# Aggregate fungal data
results$LPI <- as.numeric(as.character(results$LPI))
resag2 <- aggregate(results[c('LPI','infection_efficiency','latent_period',
'uredinia_size','spore_volume','sporulation_rate','mycelium_quantity','
sucrose','salicin','glucose','fructose','C','N','salicinoid','flavon
ol','hydroxycinnamic_acid_esters','flavan3ol','total_phenolics')],result
s[c('leaf_id')], function(a) c(mean(a, na.rm=T)))

```

```

# add traits standard error to data
resag2$us_se <- NA
resag2$sp_rate_se <- NA
for (i in 1:nrow(resag2)){ # se for each ranplan from results
  resag2$us_se[i] <- se(results[which(results$leaf_id == resag2$leaf_id[i])
,]$uredinia_size, na.rm=T)
}

for (i in 1:nrow(resag2)){ # se for each ranplan from results
  resag2$sp_rate_se[i] <- se(results[which(results$leaf_id == resag2$leaf_id[i])
,]$sporulation_rate, na.rm=T)
}

## Biplot uredinia size
# with phenol
mod <- lm(uredinia_size~total_phenolics,data=resag2)
ggplot(data=resag2,aes(x=total_phenolics,y=uredinia_size,color=LPI)) +
  geom_point() +
  scale_colour_gradient(low="blue",high = "red") +
  geom_errorbar(aes(ymin=resag2$uredinia_size - resag2$us_se,
                    ymax=resag2$uredinia_size + resag2$us_se)) +
  ylab('uredinia_size (mm2)') +
  xlab('total_phenolics (mg.g DW-1)') +
  geom_text(label = paste('R2 = ',round(summary(mod)$adj.r.squared,2)), x=50,
            y=0.8, color='black') # x, y, label, alpha, angle, color, family, fontface, hjust, lineheight, size, vjust

```

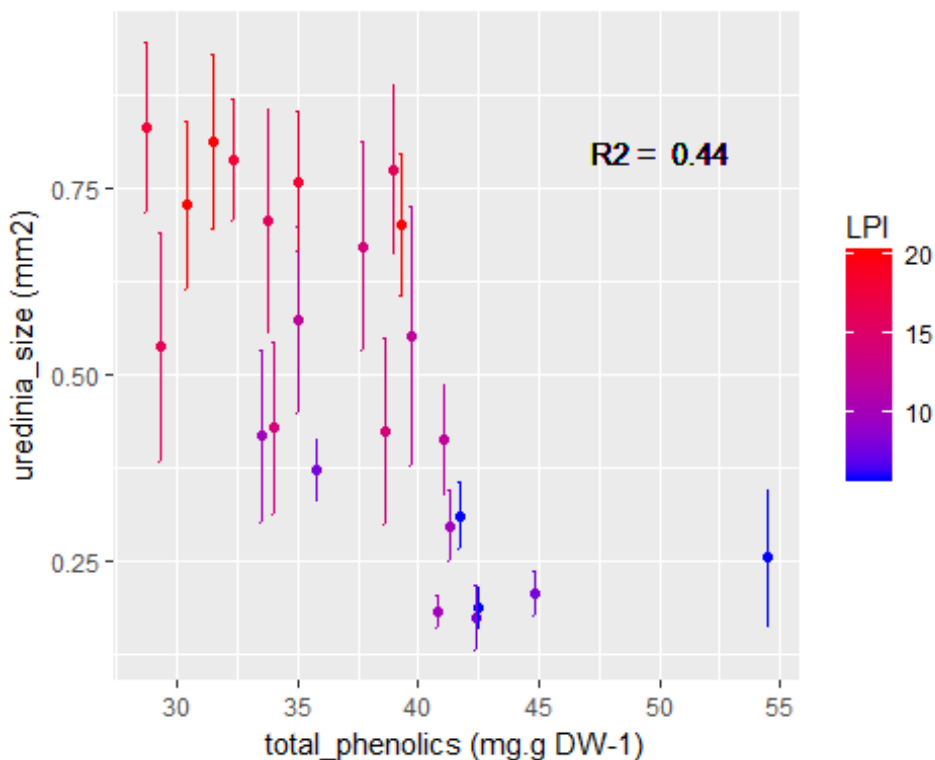

```

# without Plant1 LPI6 (outlier)
mod <- lm(uredinia_size~total_phenolics,data=resag2[which(resag2$leaf_id !=
'lp16p11'),])
ggplot(data=resag2[which(resag2$leaf_id != 'lp16p11'),], aes(x=total_phenol
ics,y=uredinia_size,color=LPI)) +
  geom_point() +
  scale_colour_gradient(low="blue",high = "red") +
  geom_errorbar(aes(ymin=resag2[which(resag2$leaf_id != 'lp16p11'),]$uredin
ia_size - resag2[which(resag2$leaf_id != 'lp16p11'),]$us_se,
  ymax=resag2[which(resag2$leaf_id != 'lp16p11'),]$uredin
ia_size + resag2[which(resag2$leaf_id != 'lp16p11'),]$us_se)) +
  geom_text(label = paste('R2 = ',round(summary(mod)$adj.r.squared,2)), x=4
2.5, y=0.8, color='black')

```

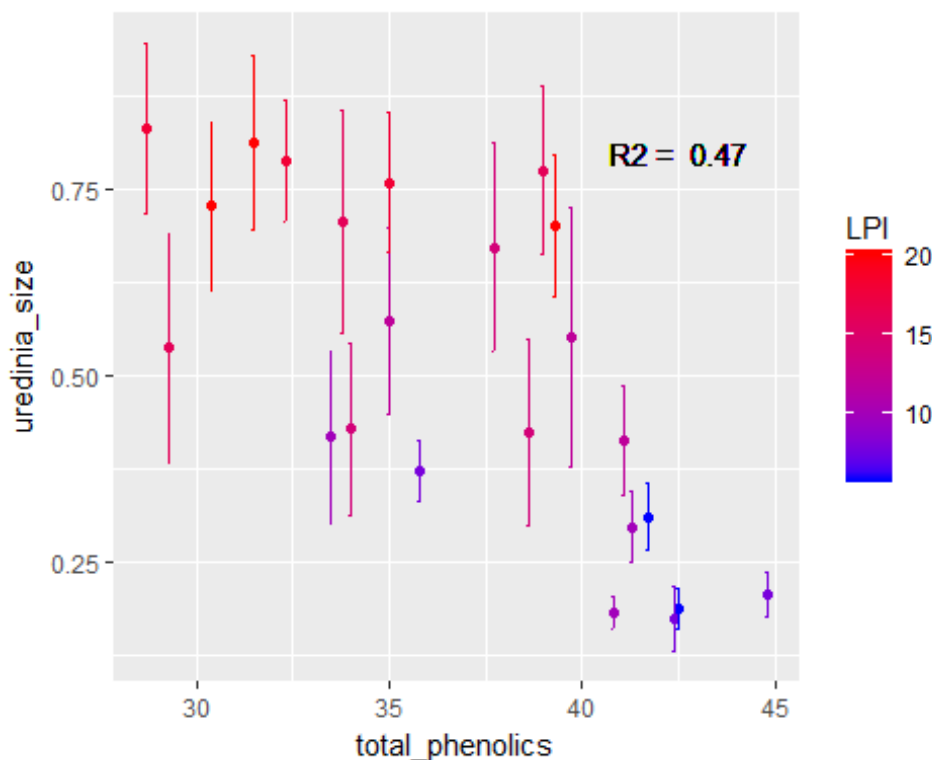

```

# with hydroxycinnamic_acid_esters
mod <- lm(uredinia_size~hydroxycinnamic_acid_esters,data=resag2)
ggplot(data=resag2,aes(x=hydroxycinnamic_acid_esters,y=uredinia_size,color=
LPI)) +
  geom_point() +
  scale_colour_gradient(low="blue",high = "red") +
  geom_errorbar(aes(ymin=resag2$uredinia_size - resag2$us_se,
  ymax=resag2$uredinia_size + resag2$us_se)) +
  ylab('uredinia_size (mm2)') +
  xlab('hydroxycinnamic_acid_esters (mg.g DW-1)') +
  geom_text(label = paste('R2 = ',round(summary(mod)$adj.r.squared,2)), x=5
000, y=0.8, color='black') # x, y, label, alpha, angle, color, family, font
face, hjust, lineheight, size, vjust

```

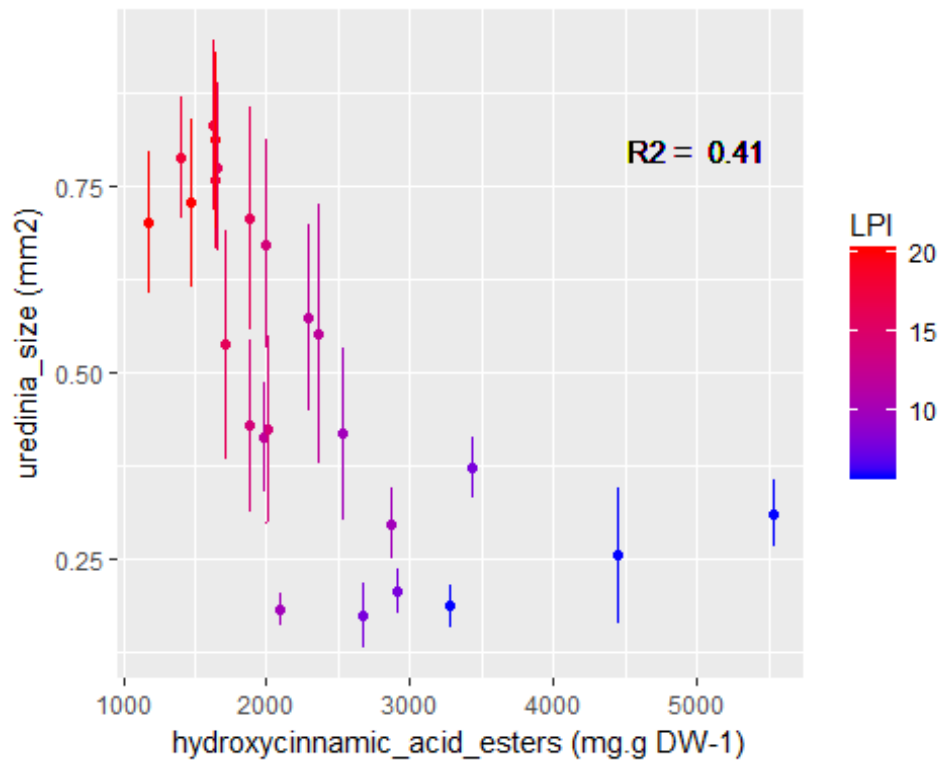

```
# without Plant1 LPI6 (outlier)
mod <- lm(uredinia_size~total_phenolics,data=resag2[which(resag2$leaf_id !=
'lp16p11'),])
ggplot(data=resag2[which(resag2$leaf_id != 'lp16p11'),], aes(x=total_phenol
ics,y=uredinia_size,color=LPI)) +
  geom_point() +
  scale_colour_gradient(low="blue",high = "red") +
  geom_errorbar(aes(ymin=resag2[which(resag2$leaf_id != 'lp16p11'),]$uredin
ia_size - resag2[which(resag2$leaf_id != 'lp16p11'),]$us_se,
  ymax=resag2[which(resag2$leaf_id != 'lp16p11'),]$uredin
ia_size + resag2[which(resag2$leaf_id != 'lp16p11'),]$us_se)) +
  geom_text(label = paste('R2 = ',round(summary(mod)$adj.r.squared,2)), x=4
2.5, y=0.8, color='black')
```

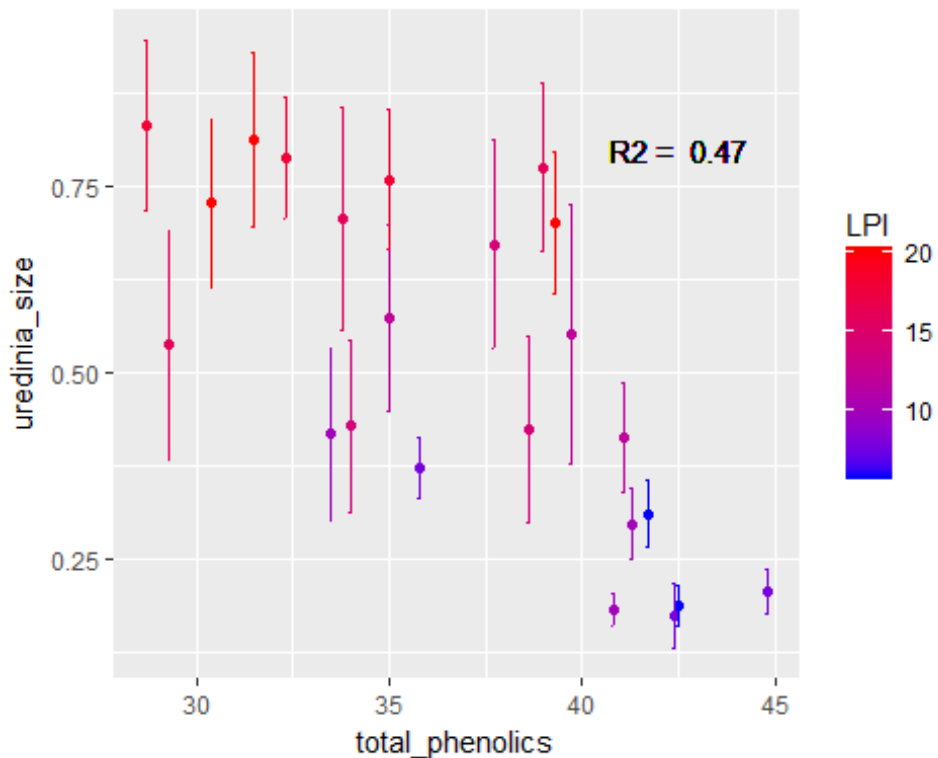

```
## Biplot sporulation rate
# with phenolics
mod <- lm(sporulation_rate~total_phenolics,data=resag2)
ggplot(data=resag2,aes(x=total_phenolics,y=sporulation_rate,color=LPI)) +
  geom_point() +
  scale_colour_gradient(low="blue",high = "red") +
  geom_errorbar(aes(ymin=resag2$sporulation_rate - resag2$sp_rate_se,
                    ymax=resag2$sporulation_rate + resag2$sp_rate_se)) +
  ylab('sporulation rate (urediniospore/day)') +
  xlab('total_phenolics (mg.g DW-1)') +
  geom_text(label = paste('R2 = ',round(summary(mod)$adj.r.squared,2)), x=50, y=750, color='black')
```

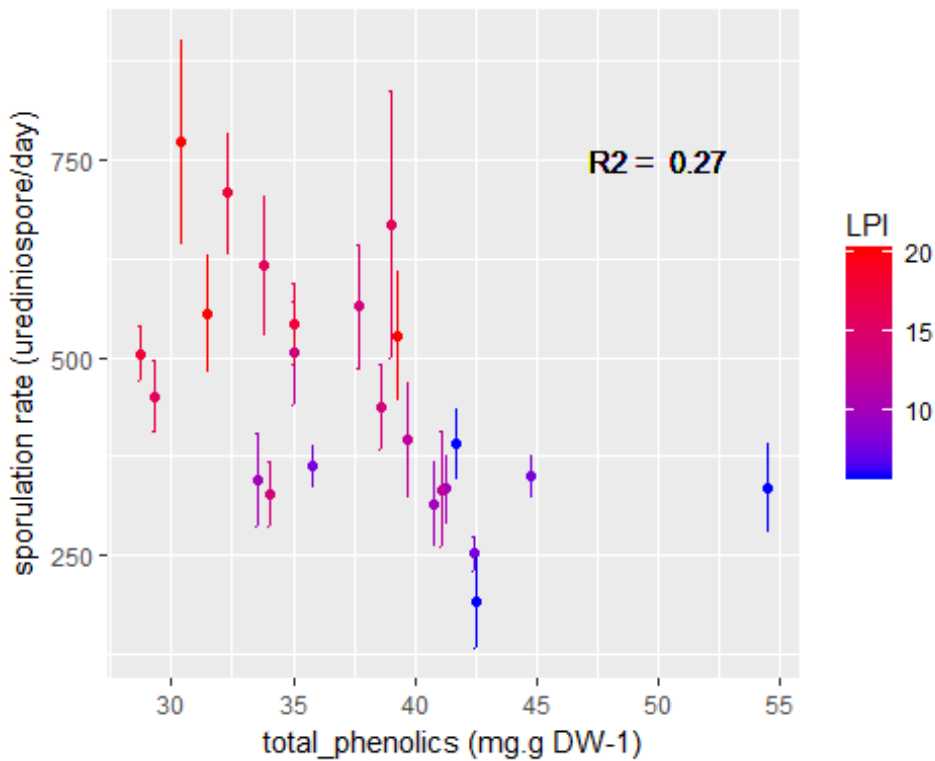

```
# without Plant1 LPI6 (outlier)
mod <- lm(sporulation_rate~total_phenolics,data=resag2[which(resag2$leaf_id
! = 'lpi6p11'),])
ggplot(data=resag2[which(resag2$leaf_id != 'lpi6p11'),],aes(x=total_phenoli
cs,y=sporulation_rate,color=LPI)) +
  geom_point() +
  scale_colour_gradient(low="blue",high = "red") +
  geom_errorbar(aes(ymin=resag2[which(resag2$leaf_id != 'lpi6p11'),]$sporul
ation_rate - resag2[which(resag2$leaf_id != 'lpi6p11'),]$sp_rate_se,
  ymax=resag2[which(resag2$leaf_id != 'lpi6p11'),]$sporul
ation_rate + resag2[which(resag2$leaf_id != 'lpi6p11'),]$sp_rate_se)) +
  geom_text(label = paste('R2 = ',round(summary(mod)$adj.r.squared,2)), x=4
2.5, y=750, color='black')
```

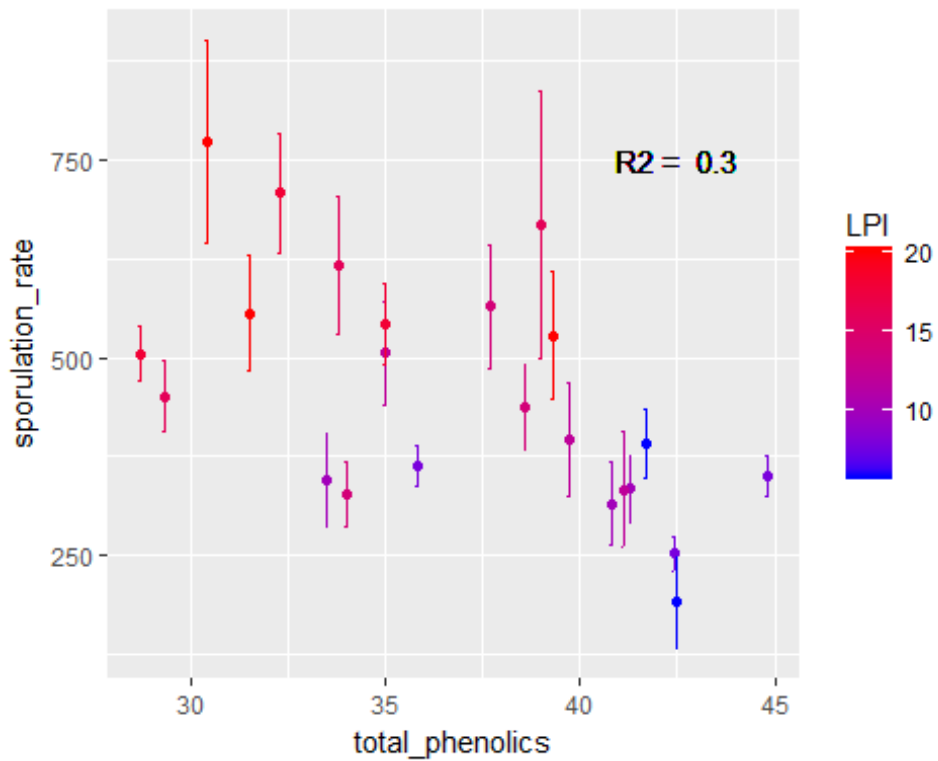

```
# with hydroxycinnamic_acid_esters
mod <- lm(sporulation_rate~hydroxycinnamic_acid_esters,data=resag2)
ggplot(data=resag2,aes(x=hydroxycinnamic_acid_esters,y=sporulation_rate,color=LPI)) +
  geom_point() +
  scale_colour_gradient(low="blue",high = "red") +
  geom_errorbar(aes(ymin=resag2$sporulation_rate - resag2$sp_rate_se,
                    ymax=resag2$sporulation_rate + resag2$sp_rate_se)) +
  ylab('sporulation_rate (urediniospore/day)') +
  xlab('hydroxycinnamic_acid_esters (mg.g DW-1)') +
  geom_text(label = paste('R2 = ',round(summary(mod)$adj.r.squared,2)), x=5000, y=750, color='black')
```



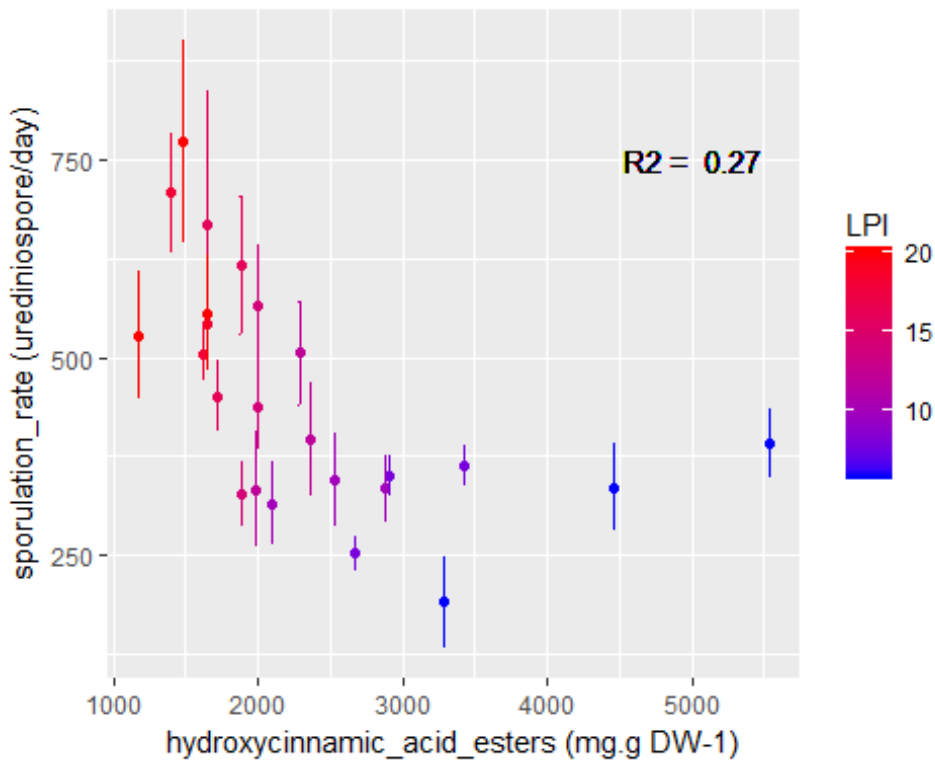

```
# without Plant1 LPI6 (outlier)
mod <- lm(sporulation_rate~total_phenolics,data=resag2[which(resag2$leaf_id
!= 'lpi6p11'),])
ggplot(data=resag2[which(resag2$leaf_id != 'lpi6p11'),],aes(x=total_phenoli
cs,y=sporulation_rate,color=LPI)) +
  geom_point() +
  scale_colour_gradient(low="blue",high = "red") +
  geom_errorbar(aes(ymin=resag2[which(resag2$leaf_id != 'lpi6p11'),]$sporul
ation_rate - resag2[which(resag2$leaf_id != 'lpi6p11'),]$sp_rate_se,
  ymax=resag2[which(resag2$leaf_id != 'lpi6p11'),]$sporul
ation_rate + resag2[which(resag2$leaf_id != 'lpi6p11'),]$sp_rate_se)) +
  geom_text(label = paste('R2 = ',round(summary(mod)$adj.r.squared,2)), x=4
2.5, y=750, color='black')
```

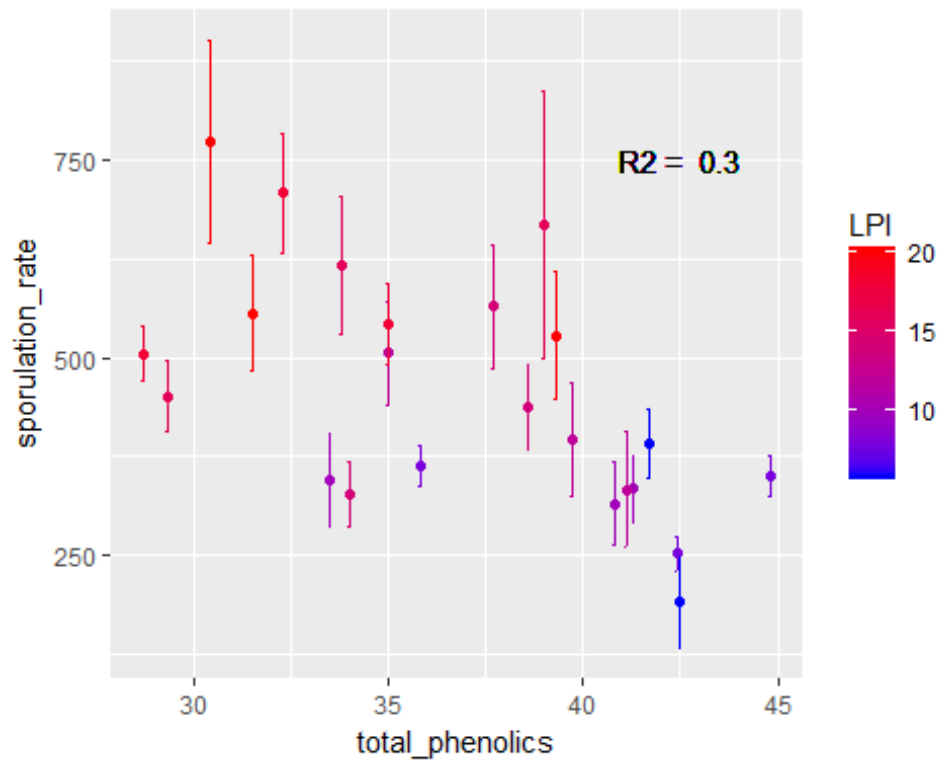

Supplement: Data_Sheet_1.pdf [file Data_Sheet_1.pdf]
